# Supplementary material for: Catalysis by FeF3 in water: a green synthesis of 2-substituted 1,3-benzazoles and 1,2-disubstituted benzimidazoles
Source: Royal Society of Chemistry journal article supplement (doi:10.1039/c2ra22302c), 2012-01-01
Supplement: c2ra22302c.pdf [file c2ra22302c.pdf]

# Multi-Recording

Sample : FeF<sub>3</sub>\_RECOVERED  
File : PX-120330-092.1120  
Comment : IDC-1/P138  
Date : 30-Mar-12 16:22  
Operator : S.V.Narasayya

X-ray : Cu K-ALPHA1 / 50 kV / 34 mA  
Gonio : RINT2000 Wide angle goniometer  
Attachment : Standard Sample Holder  
Filter : Not installed  
I. Monochro :  
C. Monochro : Automatic monochromator  
Divergence slit : "1deg."  
Scattering slit : "1deg."  
Receiving slit : "0.15mm"

Counter : Scintillation counter  
Scan mode : CONTINUOUS  
Scan speed : 3 deg./min.  
Scan step : 0.02 deg.  
Scan axis : 2 Theta / Theta  
Scan range : 3 -> 45 deg.  
Theta offset: 0 deg.  
Sample rotation: 0 deg.

*SV*  
*30/03/2012*

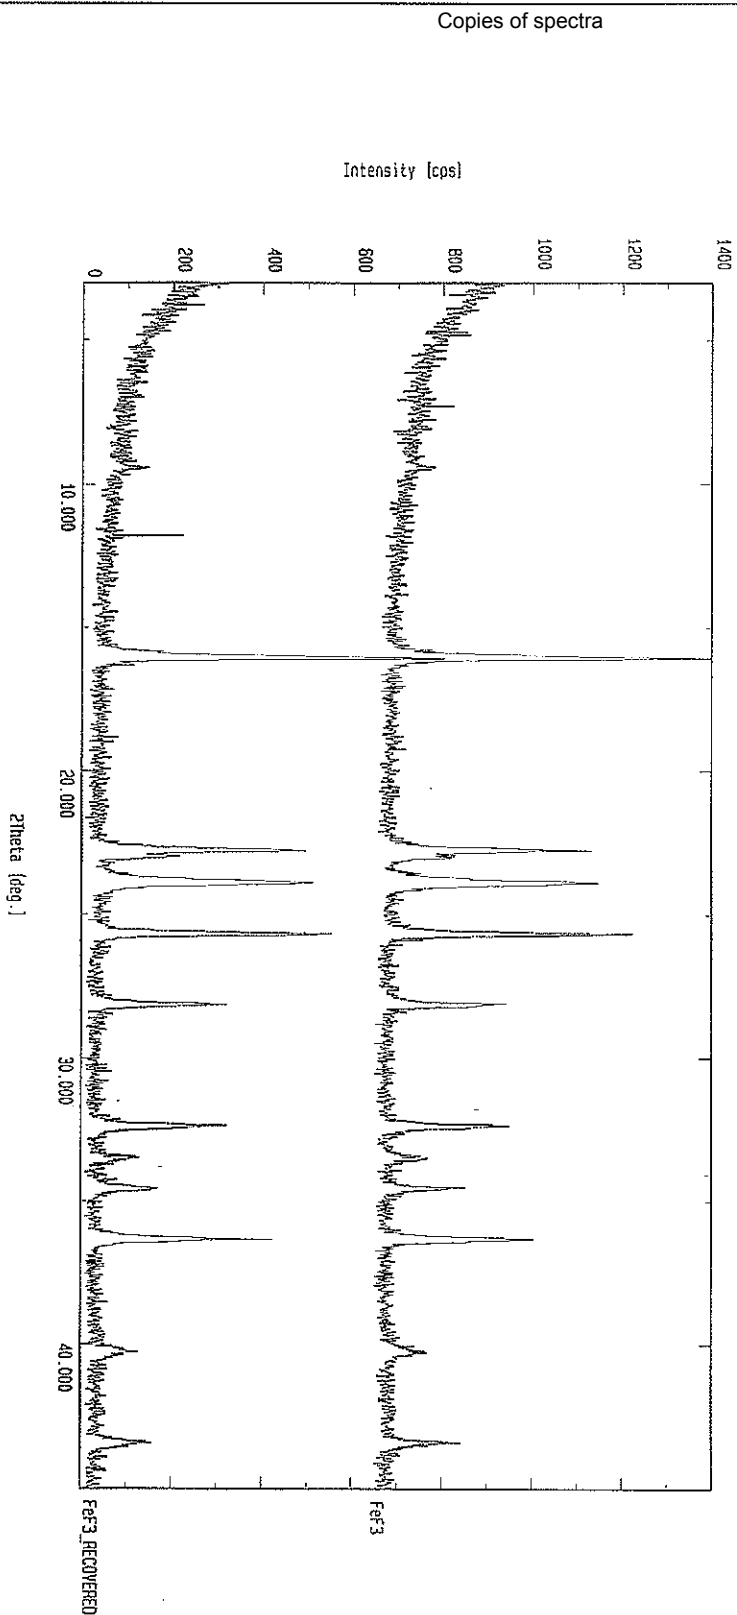

Copies of spectra

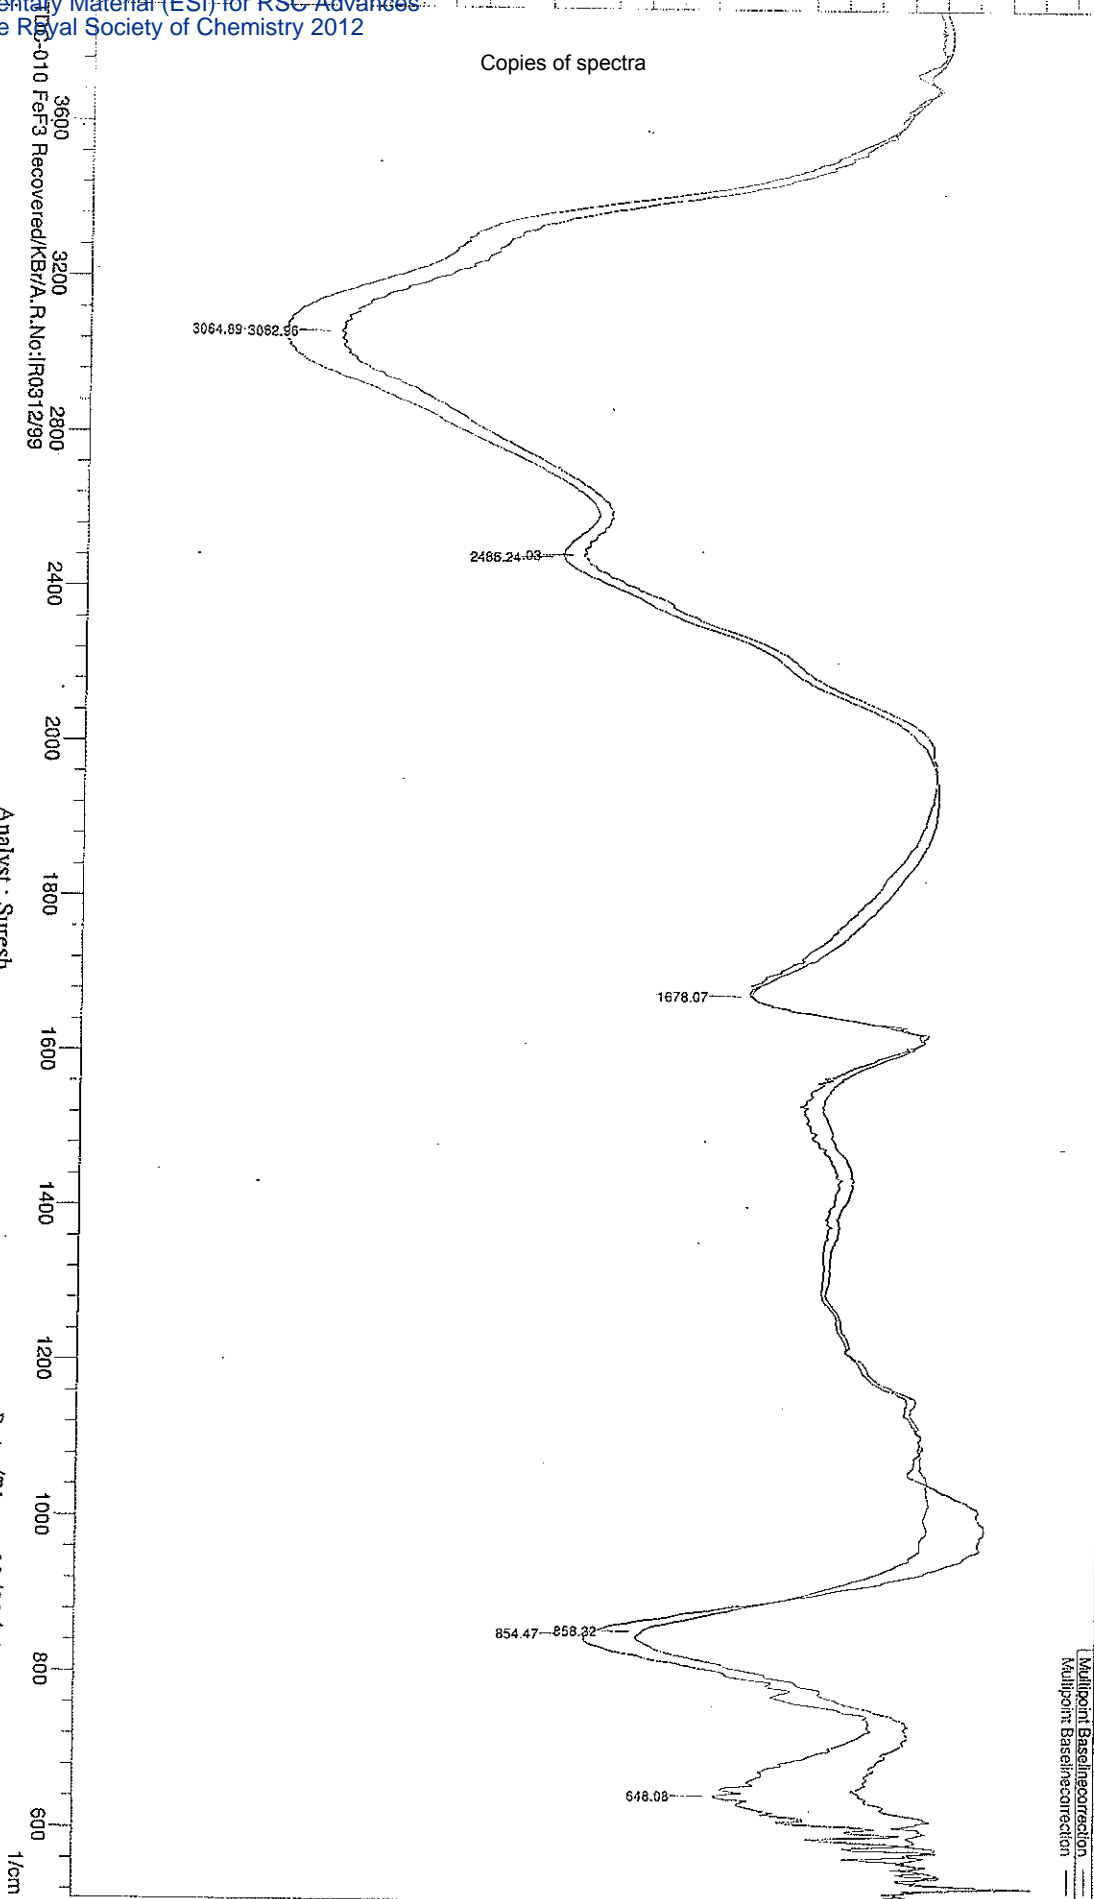

3600  
3200  
2800  
2400  
2000  
1800  
1600  
1400  
1200  
1000  
800  
600  
1/cm

Analyst: Suresh

03/30/12 08:04:44 PM

03/30/12 08:08:33 PM

03/30/12 08:08:33 PM

Date/Time: 03/30/12 08:04:44 PM  
 03/30/12 08:08:33 PM  
 User: lib-3

Copies of spectra

NMR-400MHz in DMSO  
AR.No:ME0710/688  
Date:9th July 2010

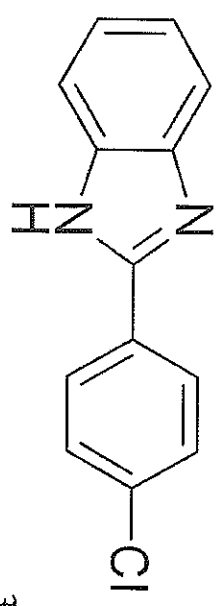

3a

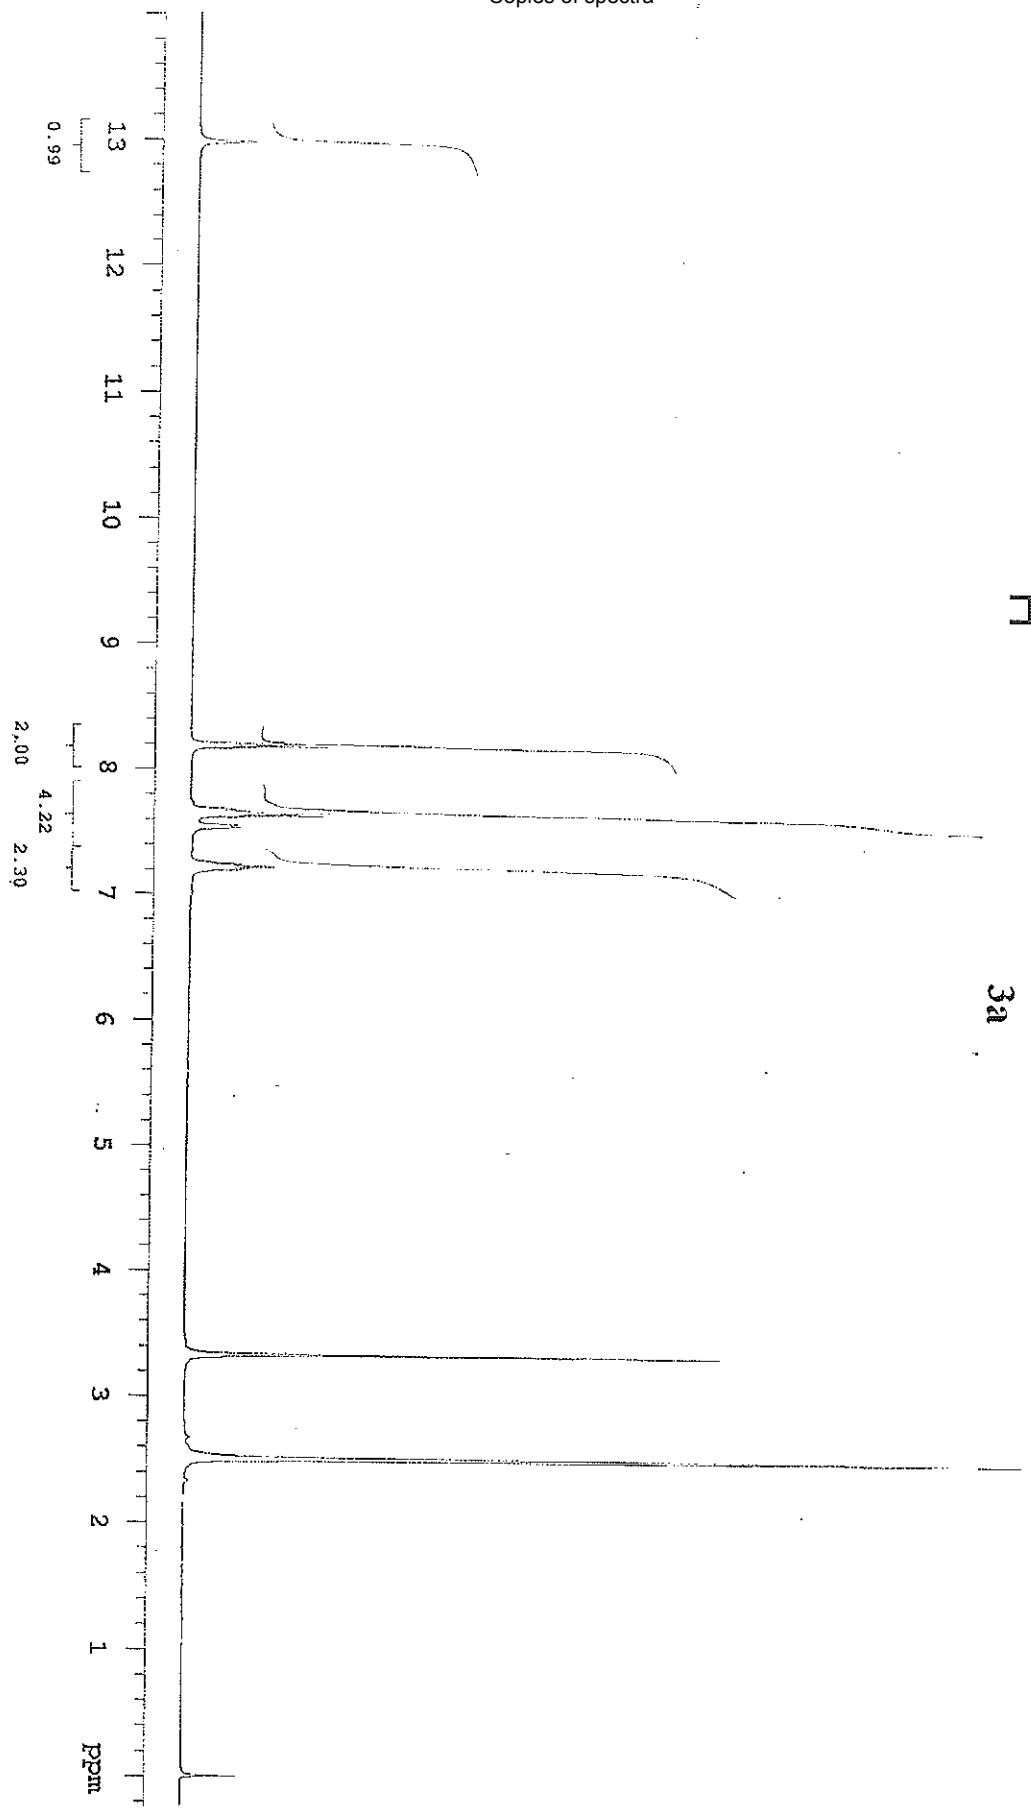

Copies of spectra

MSR-400 in DMSO  
AR NO:GE1210/12  
Date:06 th Dec. 2010

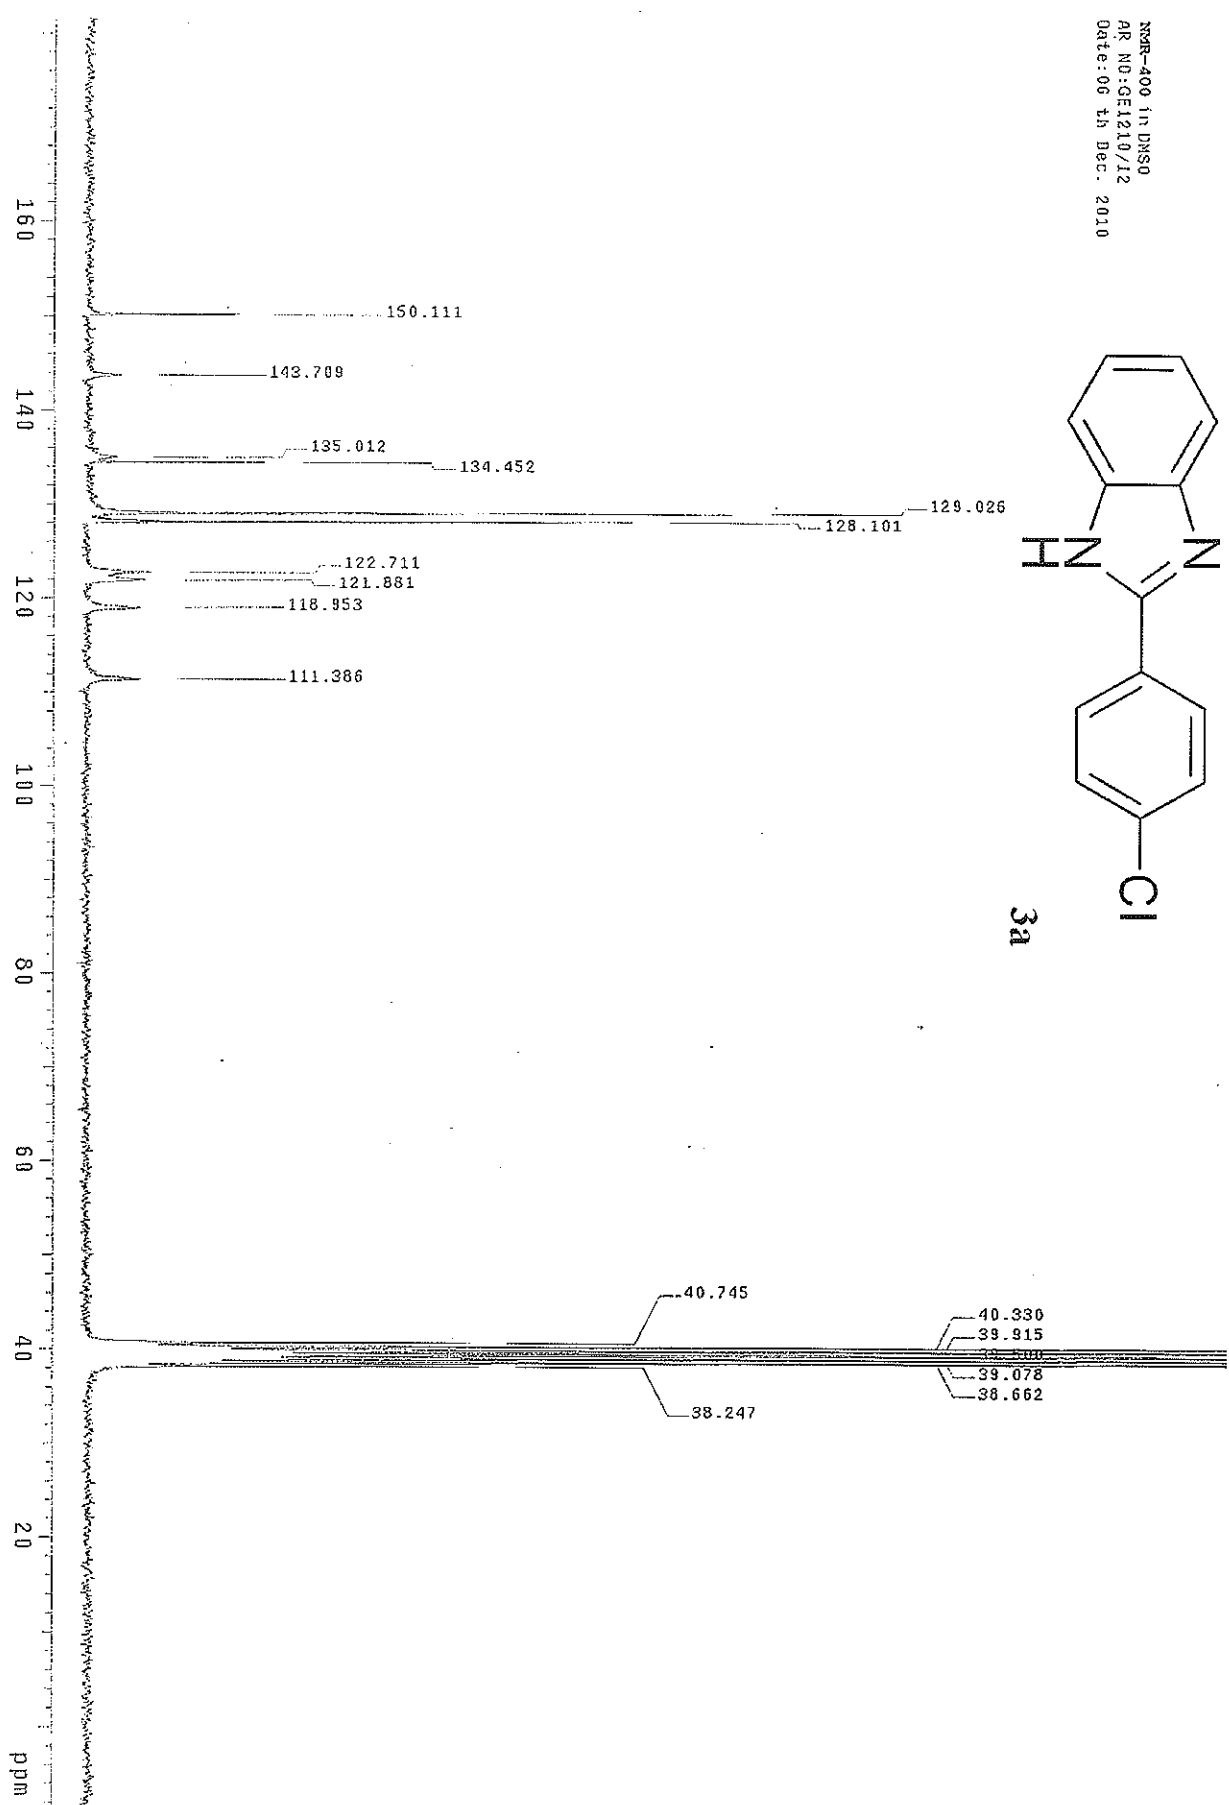

# Elemental Composition Report

## Single Mass Analysis

Tolerance = 5.0 PPM / DBE: min = -1.0, max = 80.0

Element prediction: Off

Number of isotope peaks used for I-FIT = 3

Monoisotopic Mass: Even Electron Ions

3 formula(e) evaluated with 1 results within limits (up to 4 best isotopic matches for each mass)

Elements Used:

C: 0-15 H: 0-10 N: 0-2 Cl: 0-1

UT0312\_1613 (0.251) Cm (13:15)

Dr.Reddy's Laboratories Ltd, ARD, TDC-1

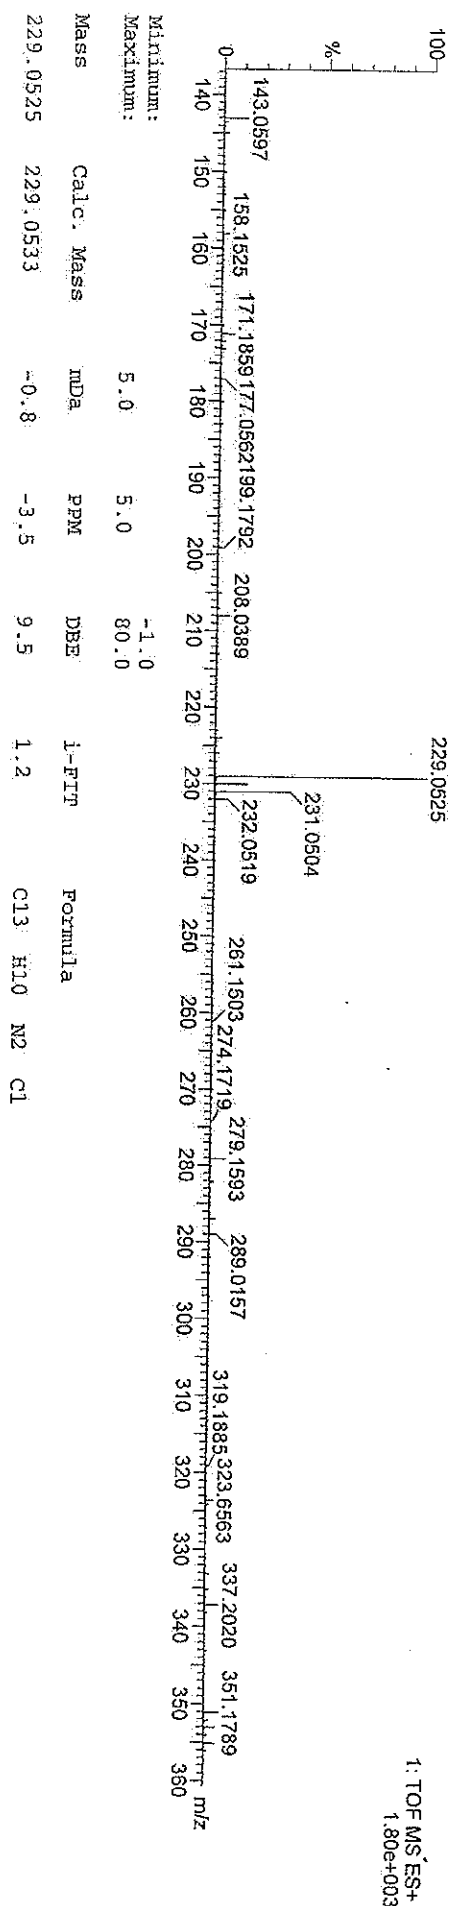

Minimum: 5.0  
Maximum: 5.0  
-1.0  
80.0

| Mass     | Calc. Mass | MDA  | PPM  | DBE | I-FIT | Formula       |
|----------|------------|------|------|-----|-------|---------------|
| 229.0525 | 229.0533   | -0.8 | -3.5 | 9.5 | 1.2   | C13 H10 N2 Cl |

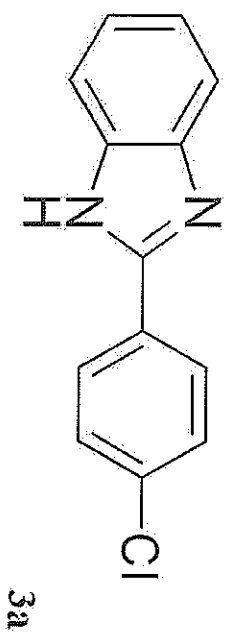

Copies of spectra

NMR-400MHz in DMSO  
Ac.No:ME0212/1138  
Date: 13th Feb.2012

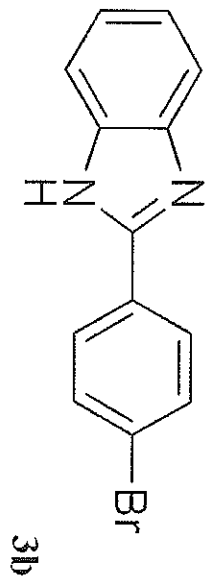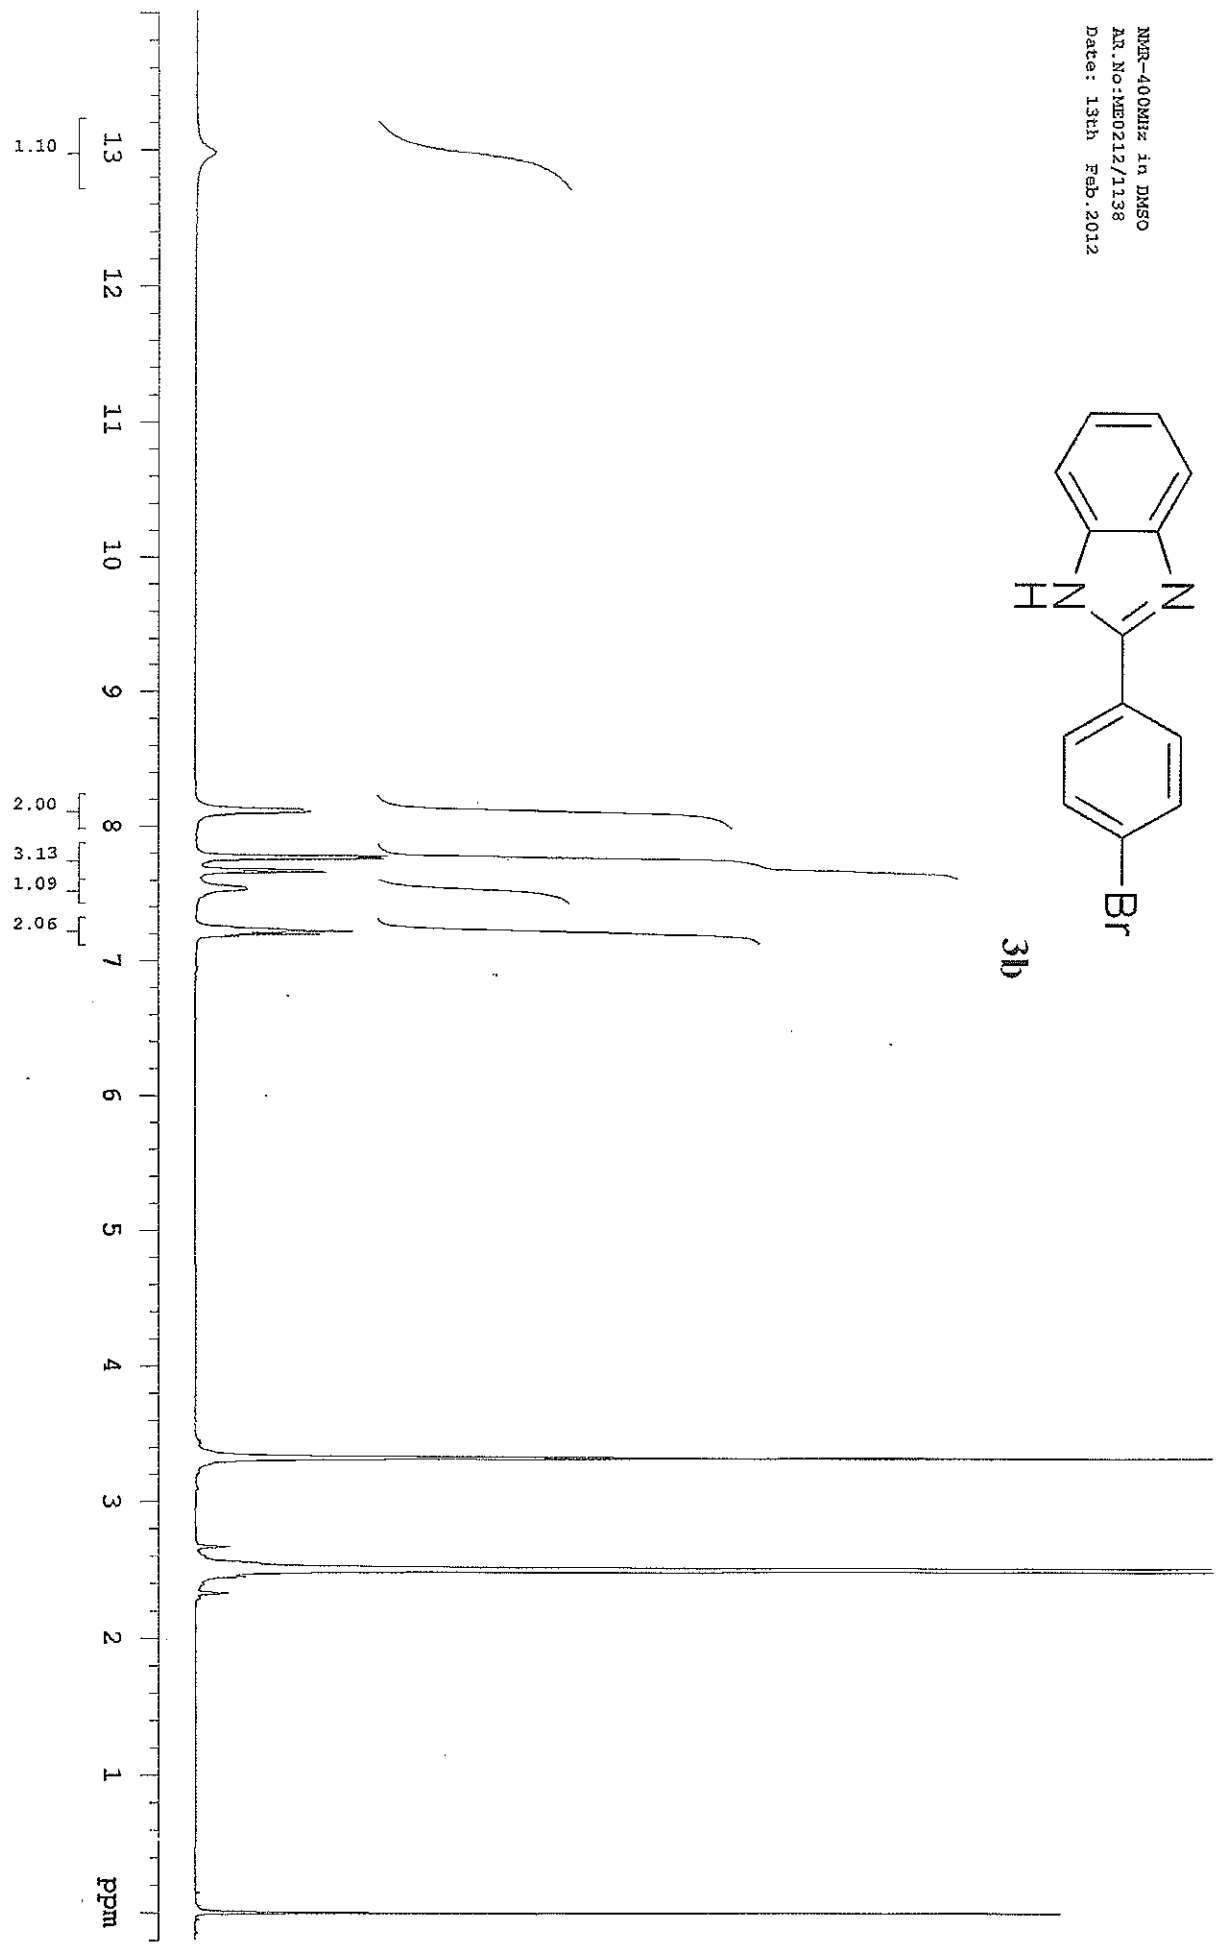

NMR-400 in DMSO  
AR.No:ME1110/1117  
Date: 16 th Nov 2010

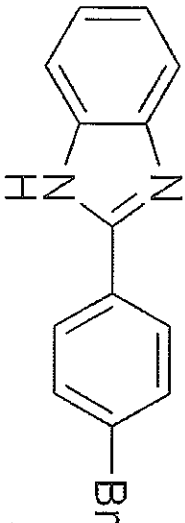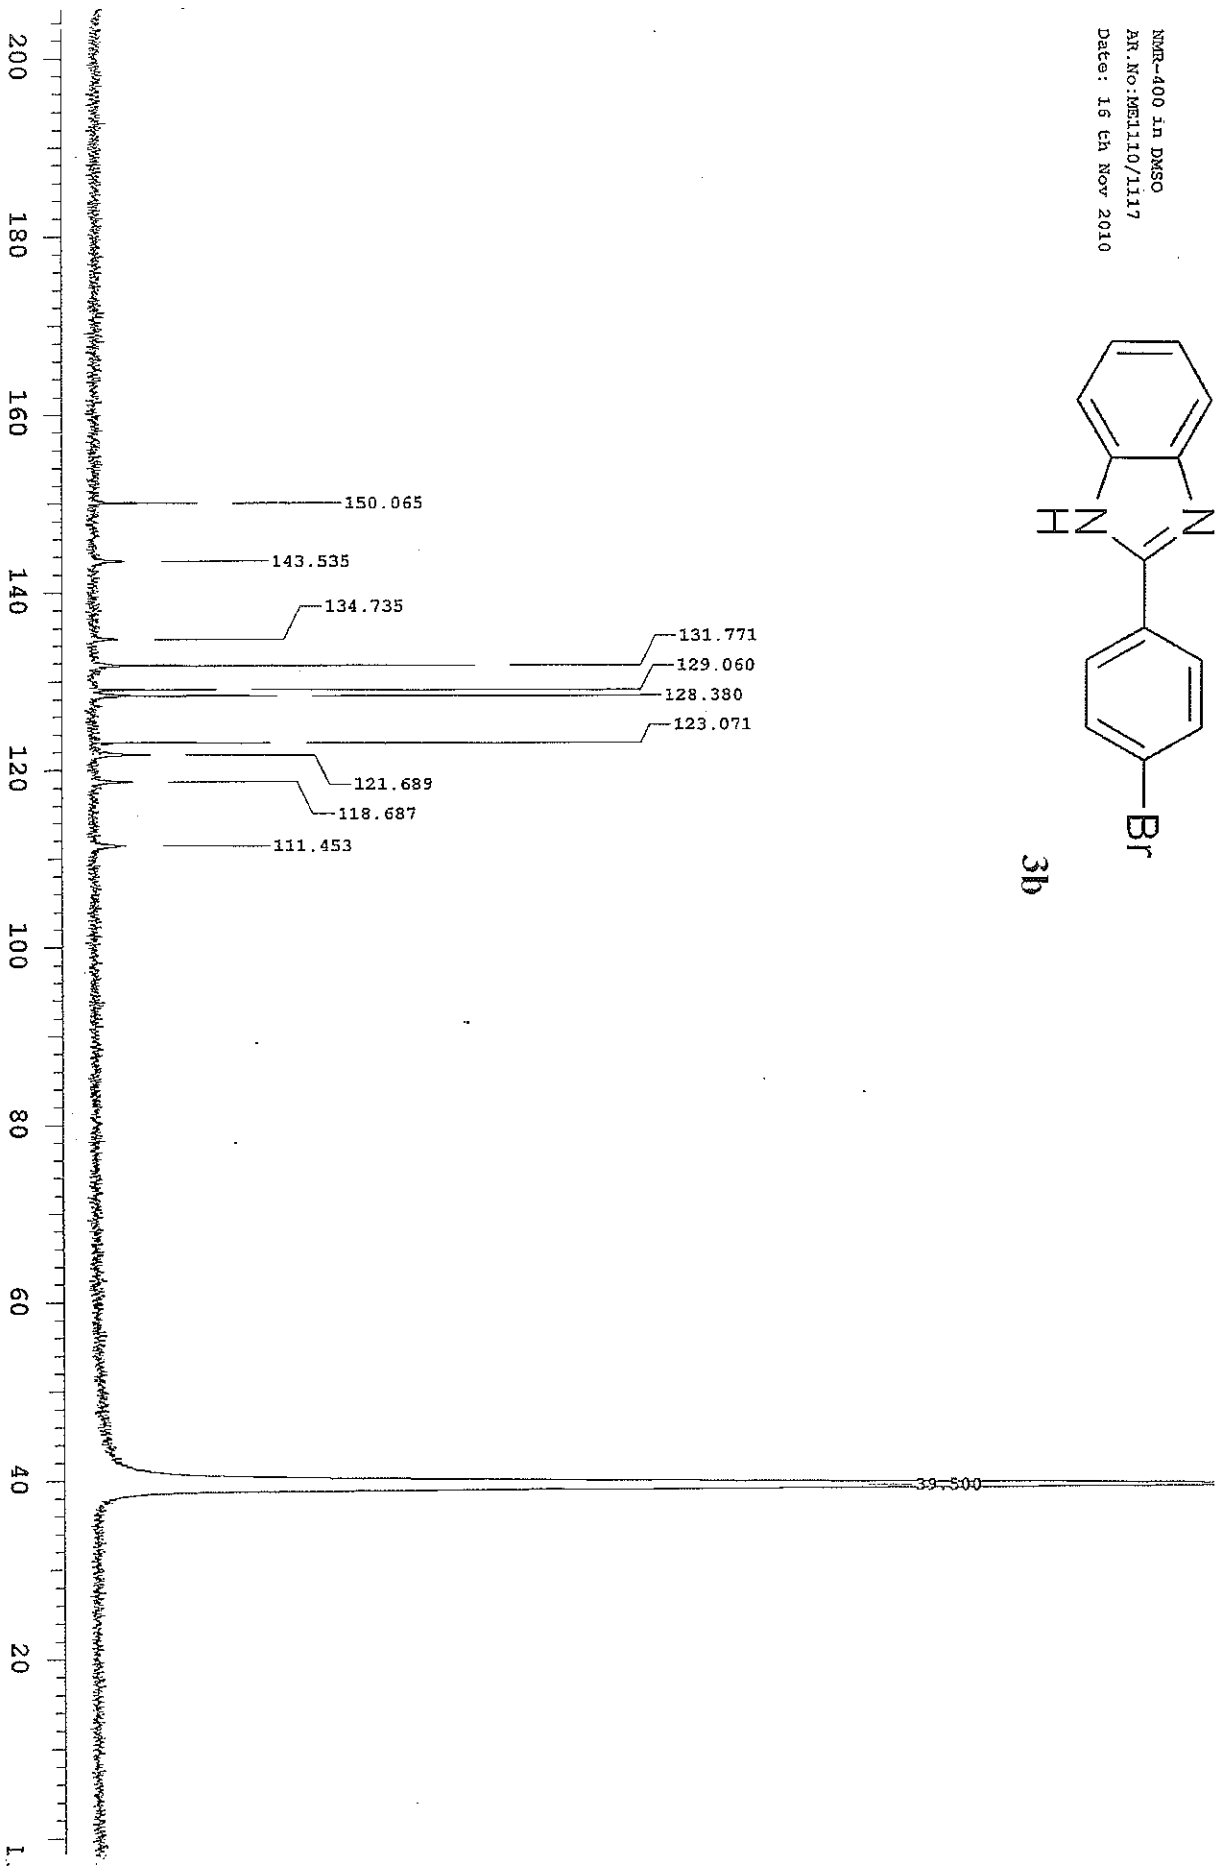

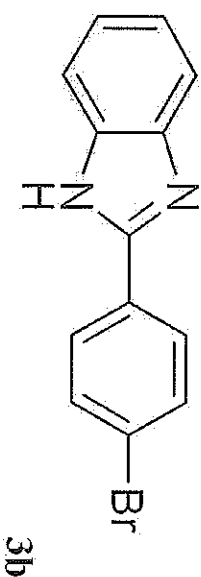



Copies of spectra

NMR-400 in DMSO  
Ac.No: ME1010/41  
Date: 01 st Oct 2010

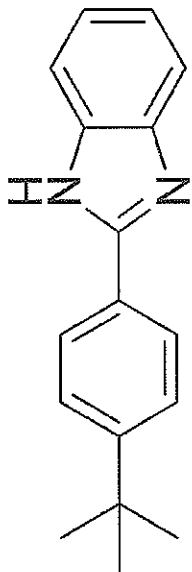

3c

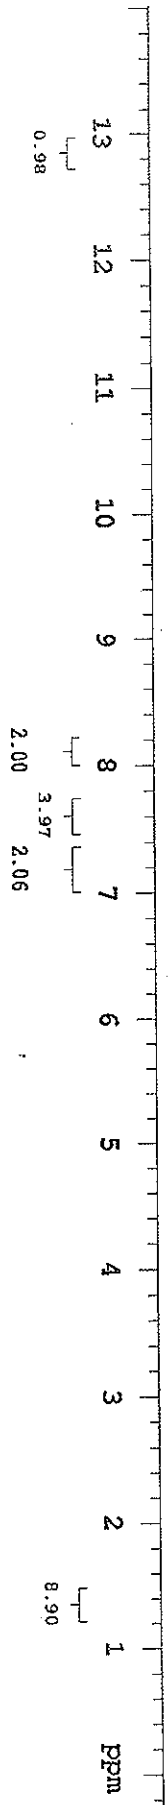

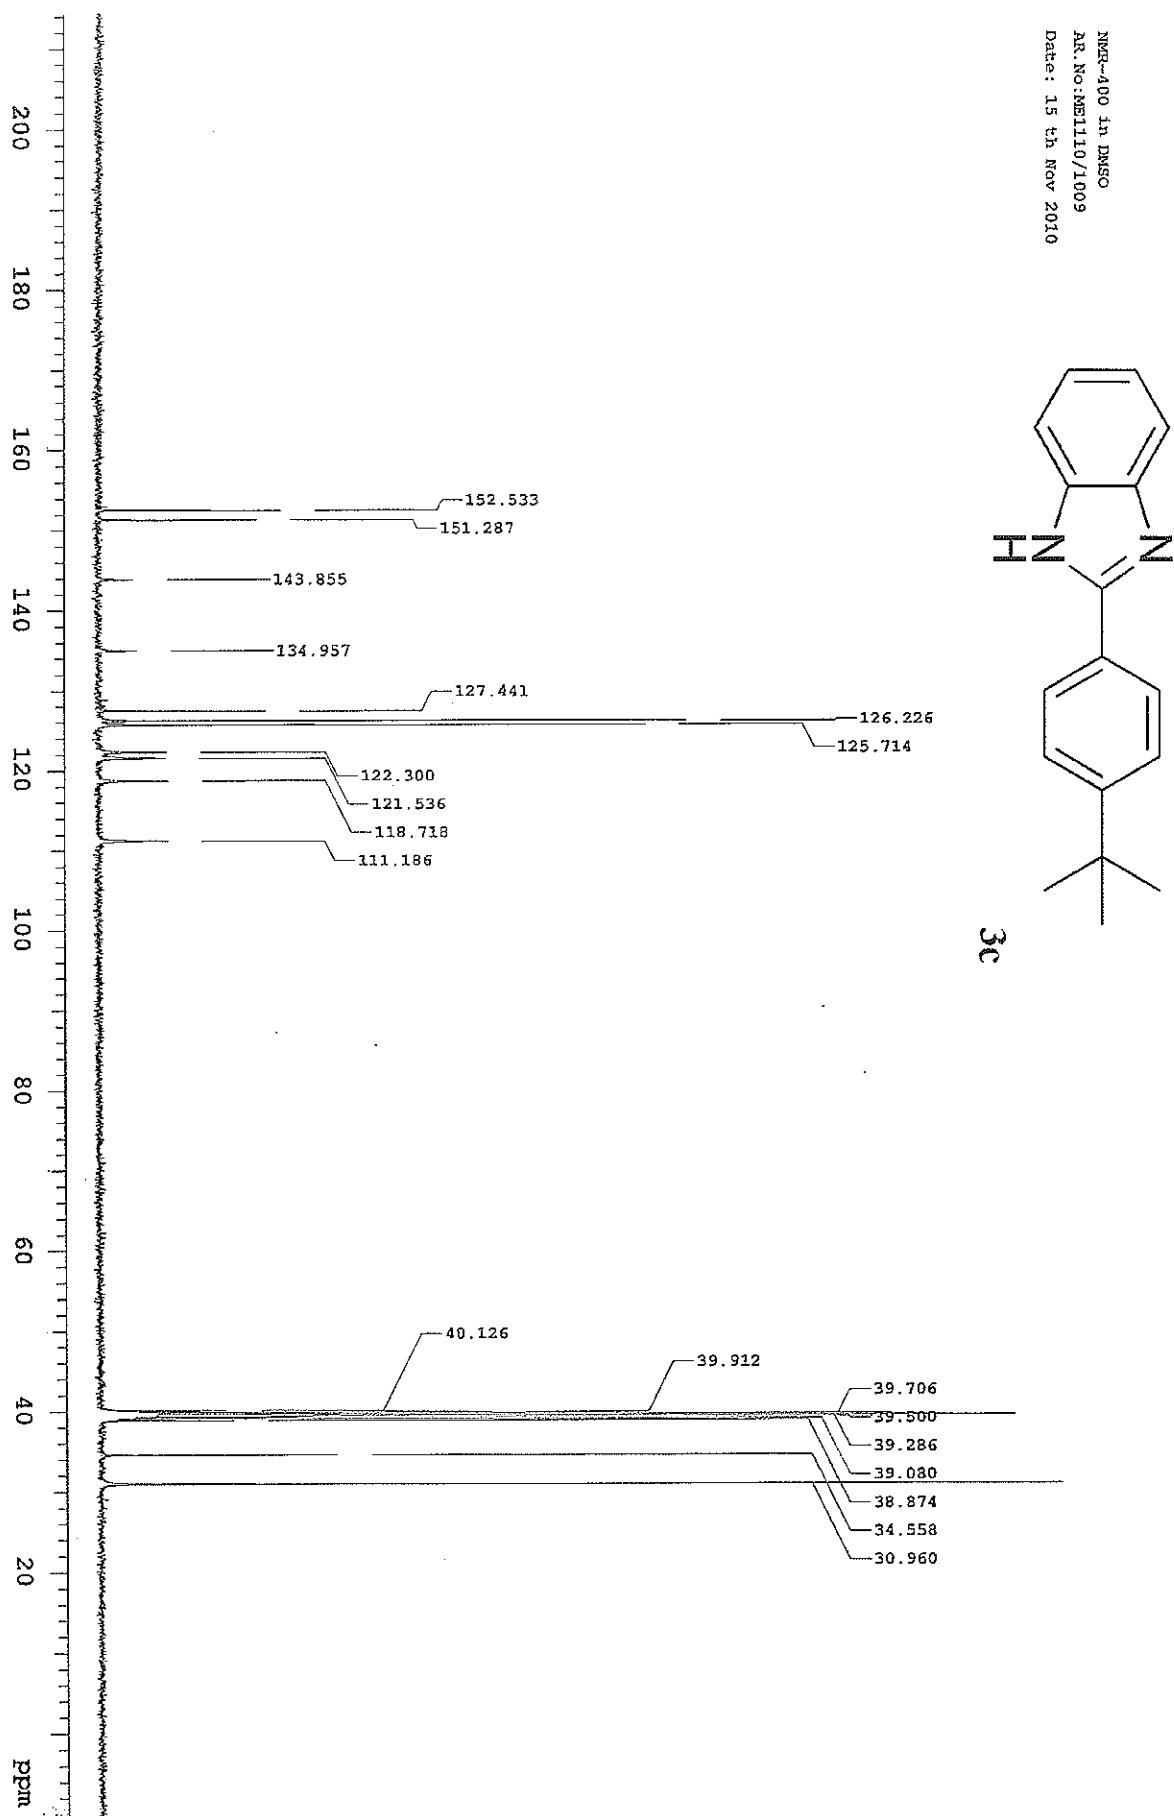

NMR-400 in DMSO  
AR.No:ME110/1009  
Date: 15 th Nov 2010

3c

### Single Mass Analysis

Element prediction: Off

### Monoisotopic Mass, Even Electron Ions

4 formula(e) evaluated with 1 results within limits (up to 4 best isotopic matches for each mass)

Elements Used:

C: 0-20 H: 0-20 N: 0-2

Dr.Reddy's Laboratories Ltd, ARD, TDC-1

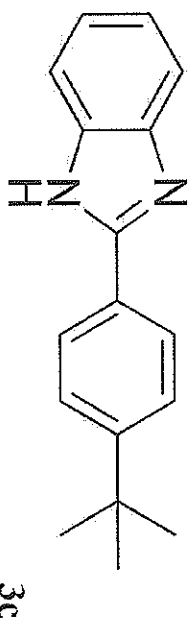

HNMR-400MHz in DMSO  
Ac.No: MS0212/1139  
Date: 13th Feb, 2012

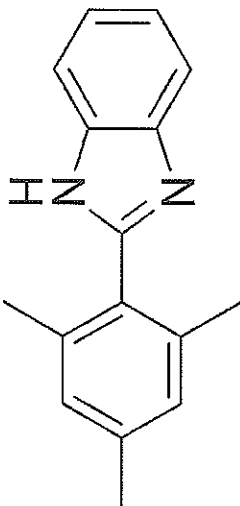

3d

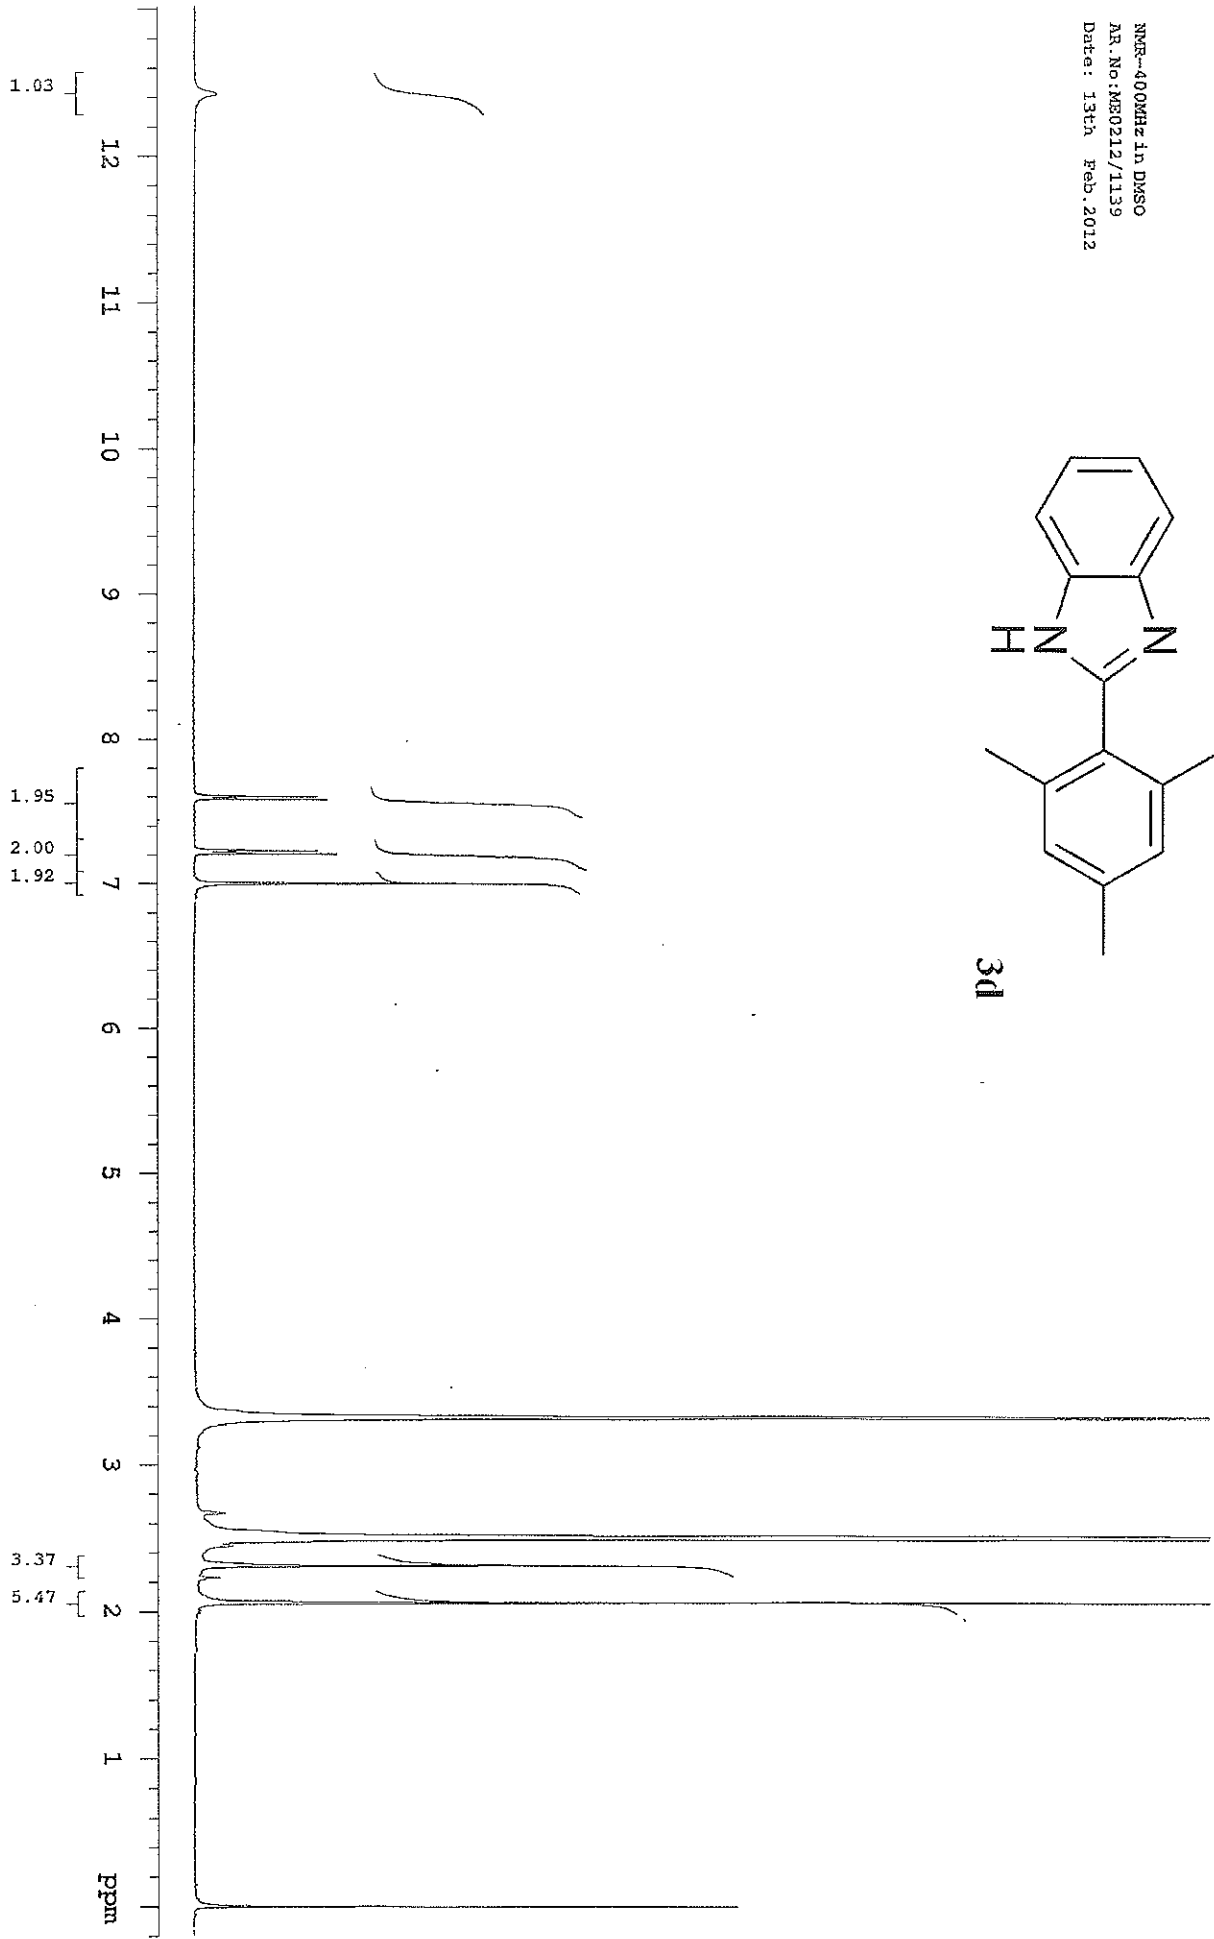

NR-400 1h DMSO  
IR.No:ME110/1118  
Date: 16 th Nov 2010

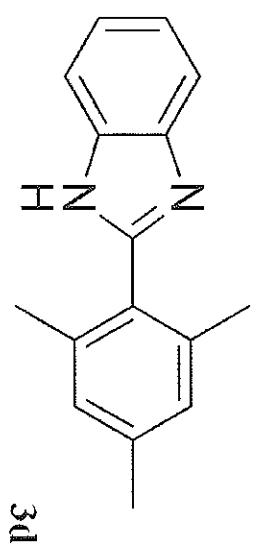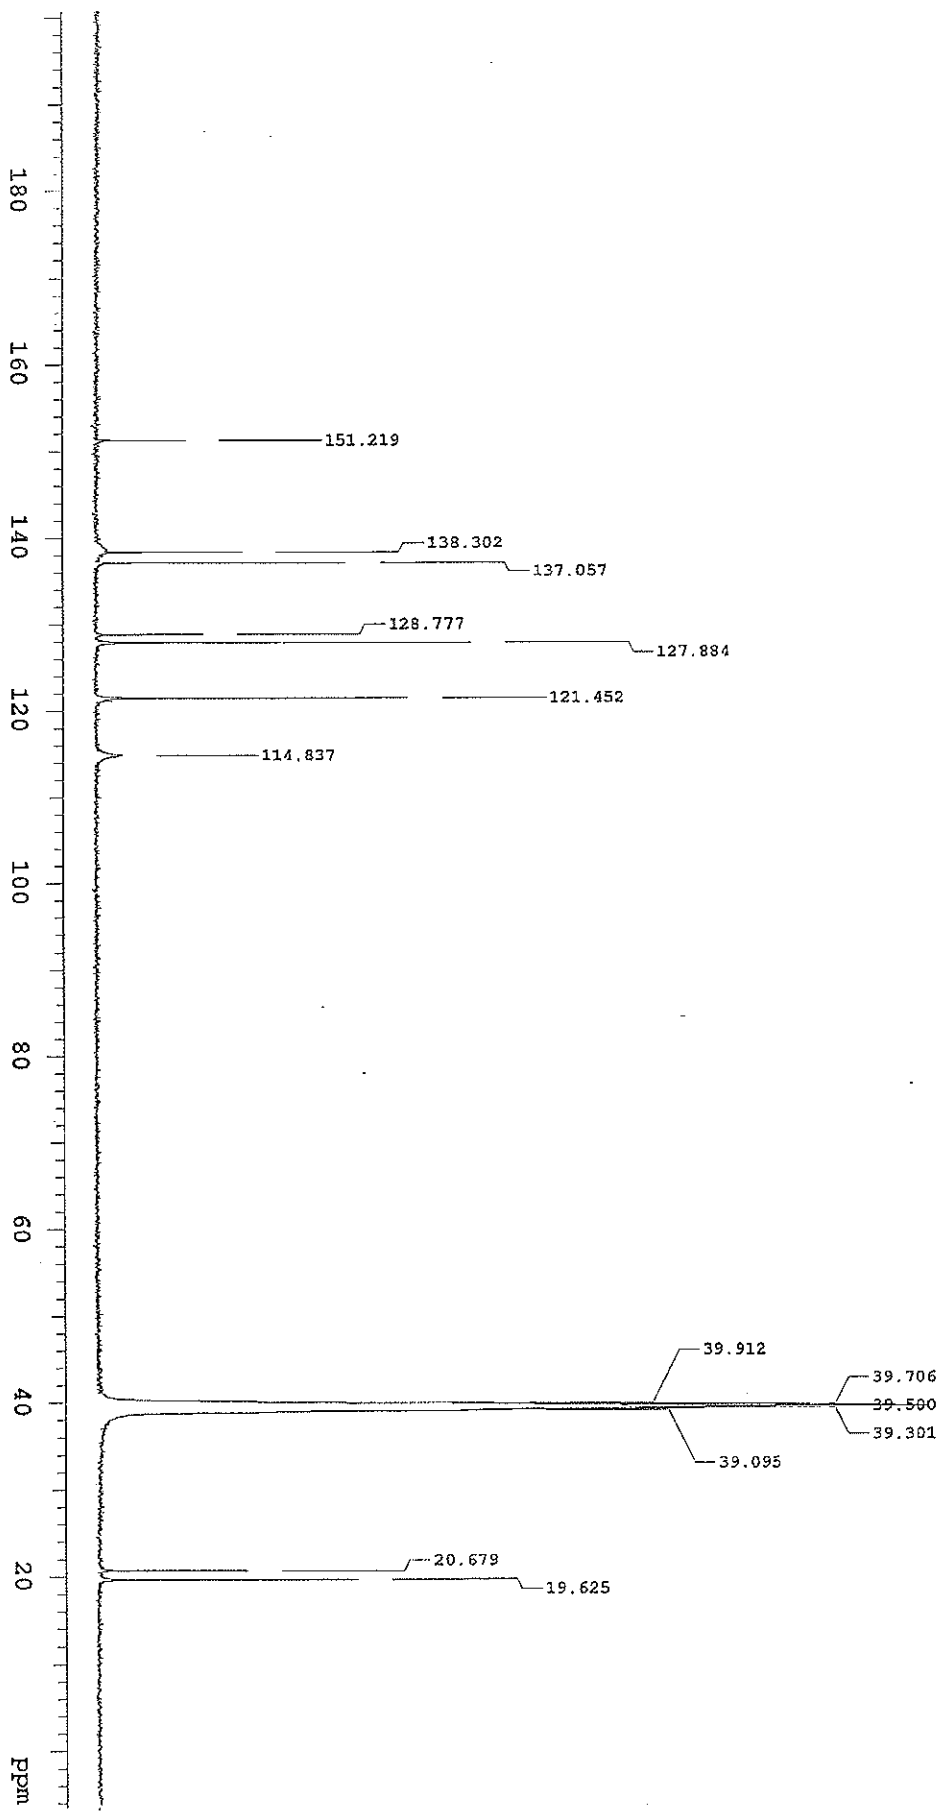

Copies of spectra

### Elemental Composition Report

#### Single Mass Analysis

Tolerance = 5.0 PPM / DBE: min = -1.0, max = 80.0

Element prediction: Off

Number of isotope peaks used for i-FIT = 3

Monoisotopic Mass, Even Electron Ions

5 formula(e) evaluated with 1 results within limits (up to 4 best isotopic matches for each mass)

Elements Used:

C: 0-20 H: 0-20 N: 0-2

Dr. Reddy's Laboratories Ltd, ARD, TDC-1

UT0312\_18 22 (0.413) Cm (21:24\*(1:2+37:42)x0.010)

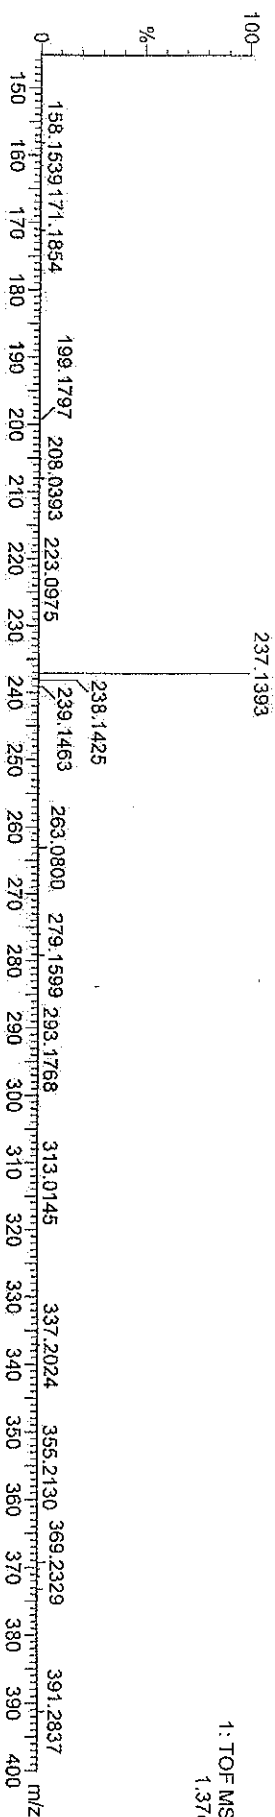

Minimum: 5.0  
Maximum: 5.0  
-1.0  
80.0

| Mass     | Calc. Mass | mDa | PPM | DBE | i-FIT | Formula    |
|----------|------------|-----|-----|-----|-------|------------|
| 237.1393 | 237.1392   | 0.1 | 0.4 | 9.5 | 3.3   | C16 H17 N2 |

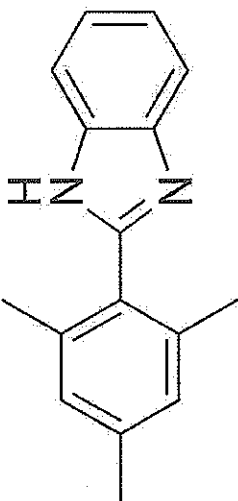

3d

NMR-400MHz in DMSO  
AR.No:ME0212/1137  
Date: 13th Feb. 2012

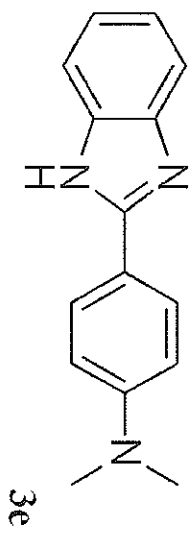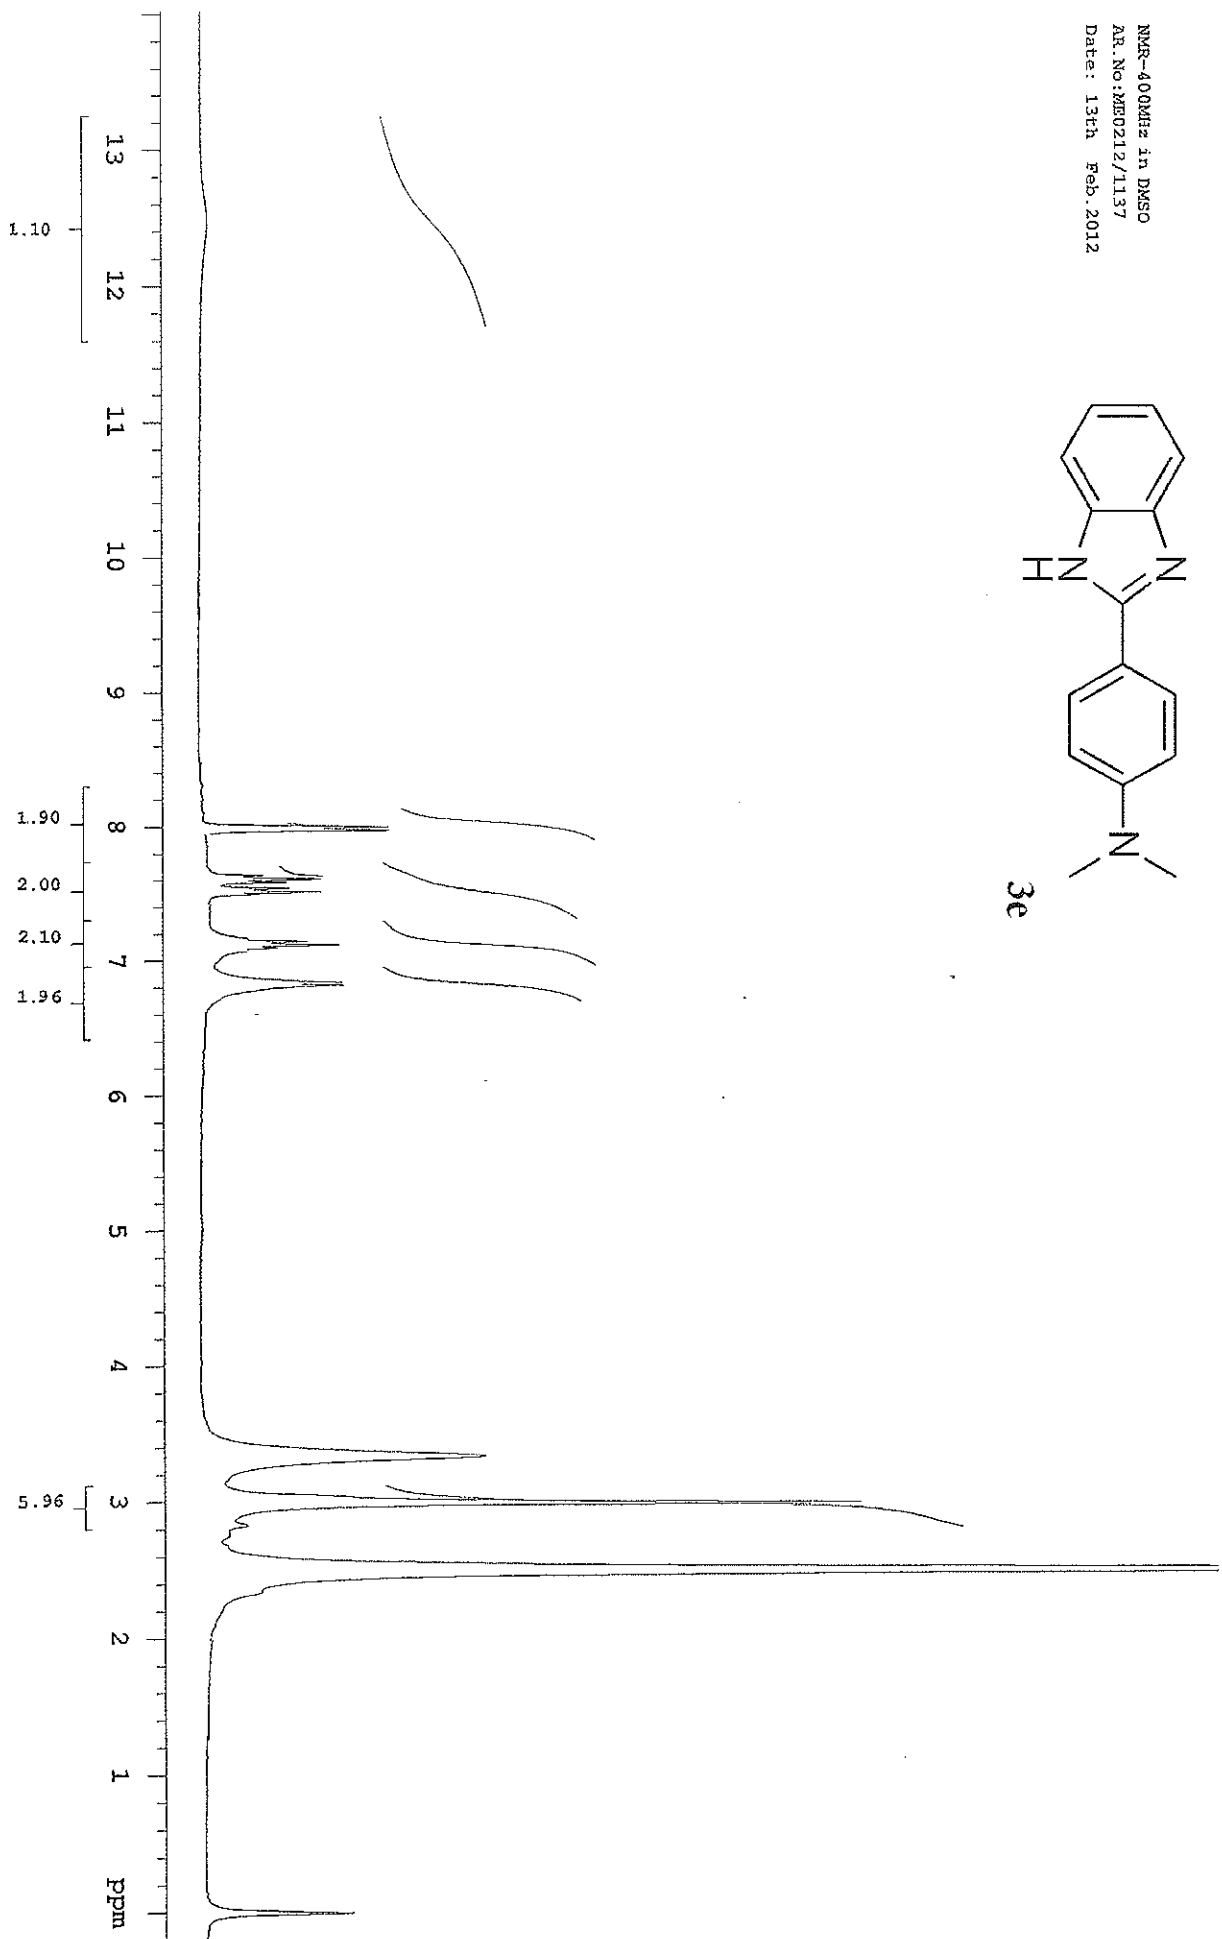

NMR-400MHz in DMSO  
AR.No: ME0312/778  
Date: 07th March, 2012

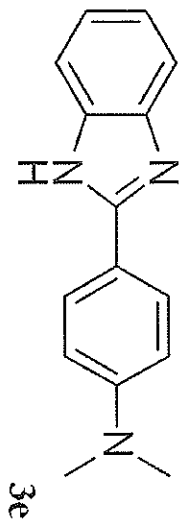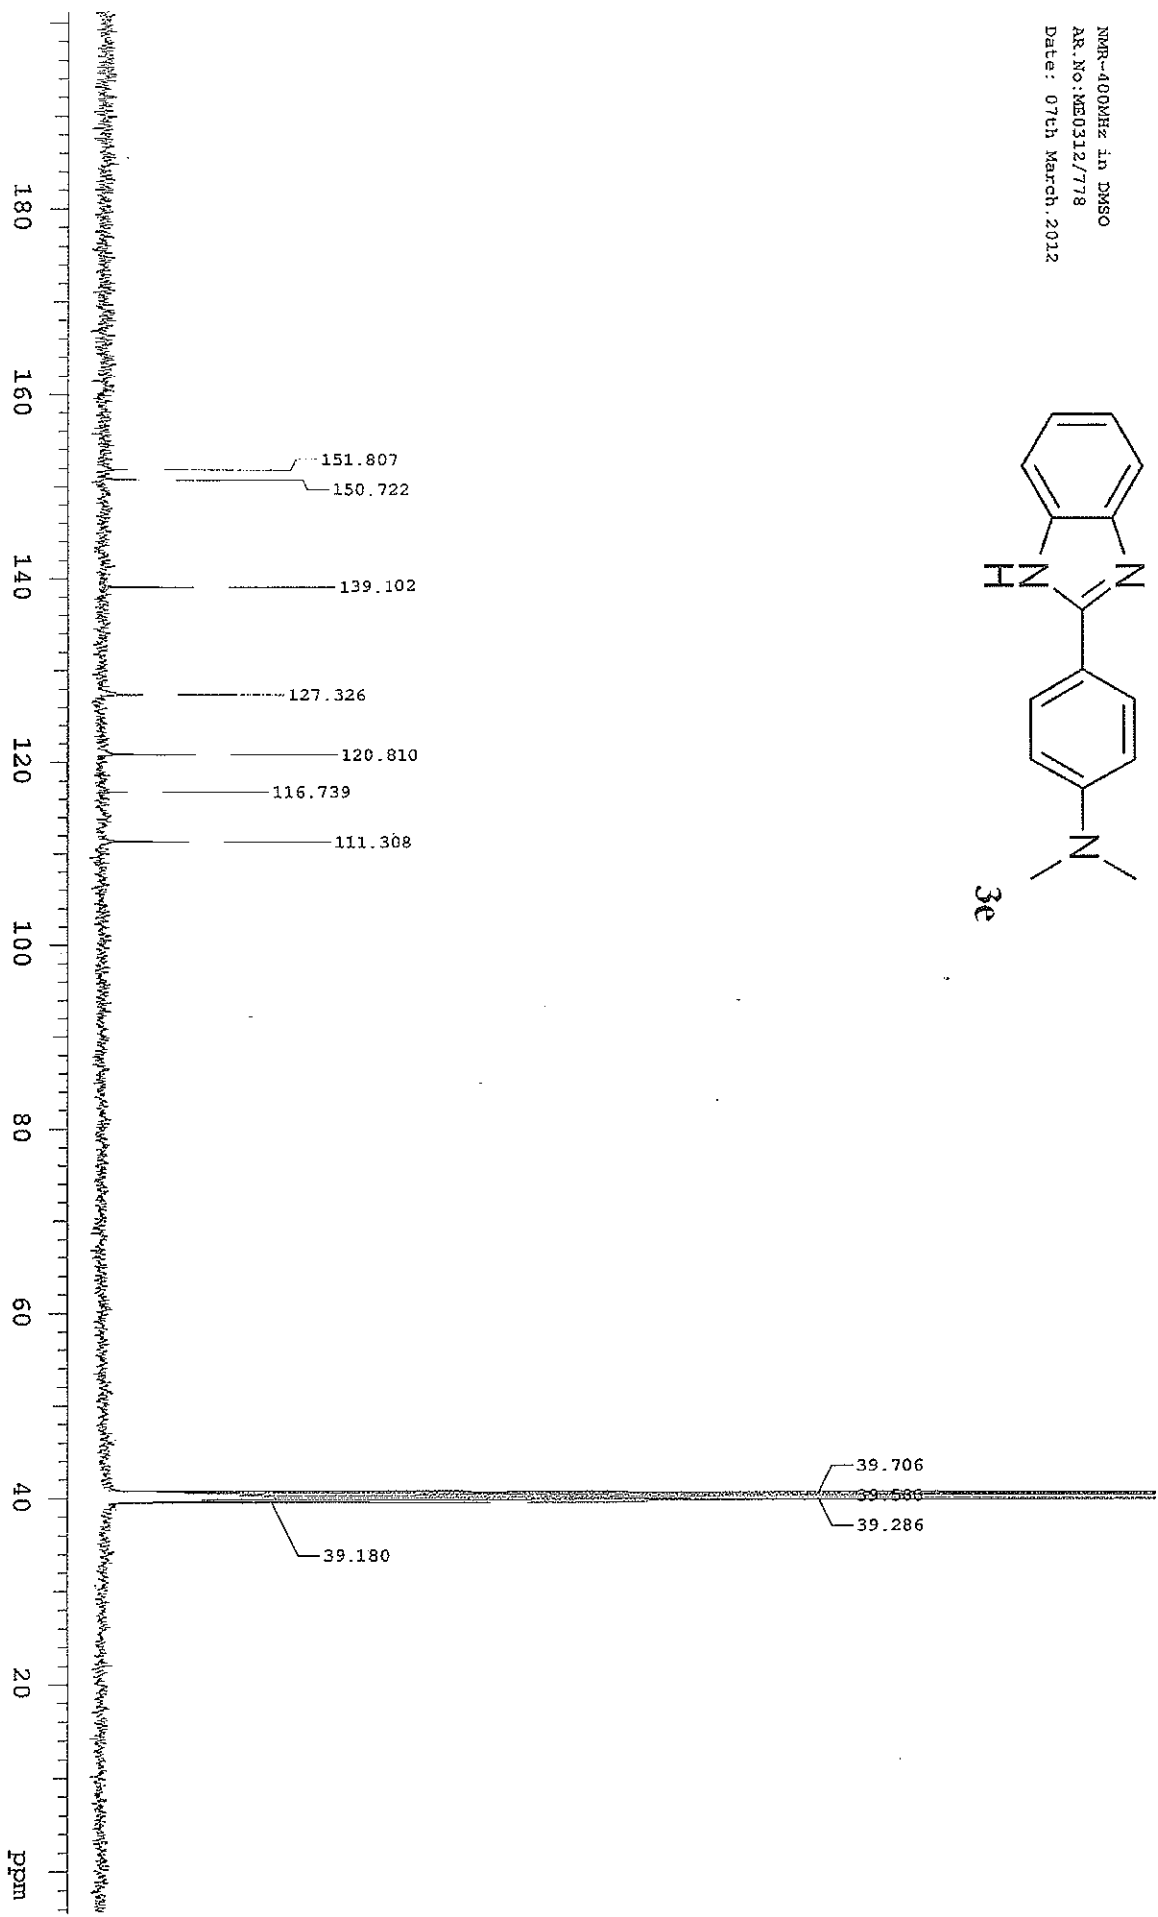



# Elemental Composition Report

## Single Mass Analysis

Tolerance = 5.0 PPM / DBE: min = -1.0, max = 80.0  
Element prediction: Off  
Number of isotope peaks used for i-FIT = 3

Monoisotopic Mass, Even Electron Ions  
3 formula(e) evaluated with 1 results within limits (up to 4 best isotopic matches for each mass)  
Elements Used:  
C: 0-15 H: 0-20 N: 0-3

Dr.Reddy's Laboratories Ltd, ARD,TDC-1

UT0312\_07 15 (0.279) Cm (12.20-14x0.010)

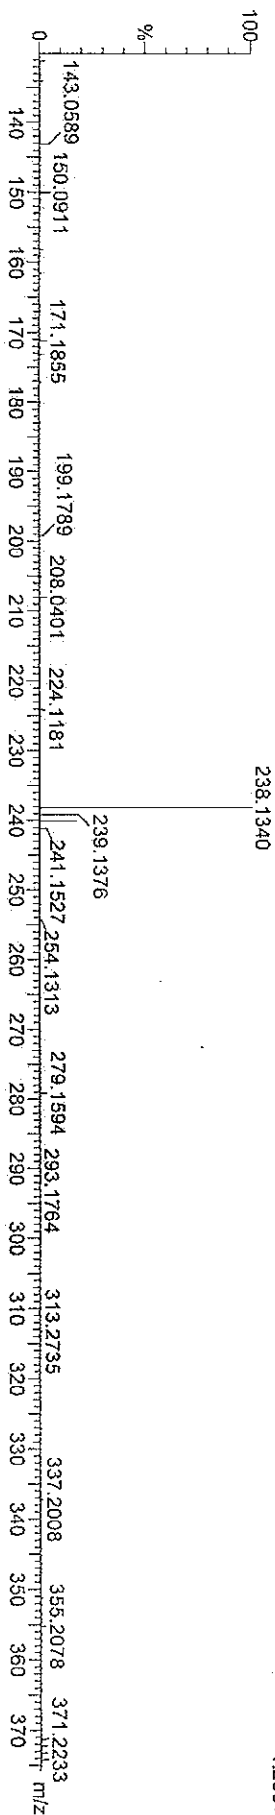

1: TOF MS ES+  
1.28e+004

Copies of spectra

|          |            |      |      |     |       |            |
|----------|------------|------|------|-----|-------|------------|
| Minimum: |            |      |      |     |       |            |
| Maximum: |            |      |      |     |       |            |
| Mass     | Calc. Mass | mDa  | PPM  | DBE | i-FIT | Formula    |
| 238.1340 | 238.1344   | -0.4 | -1.7 | 9.5 | 935.6 | C15 H16 N3 |

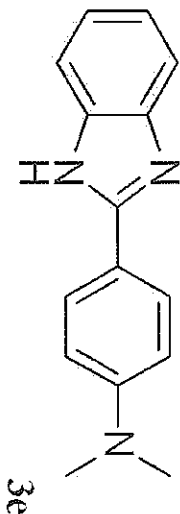

NMR-400MHz in DMSO  
Ac.No:ME0212/1136  
Date: 13th Feb. 2012

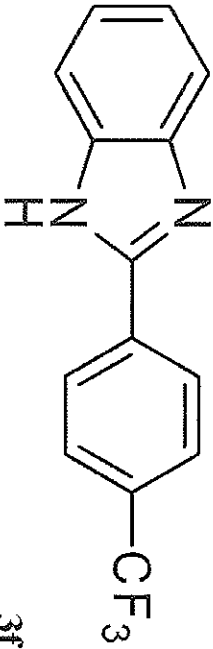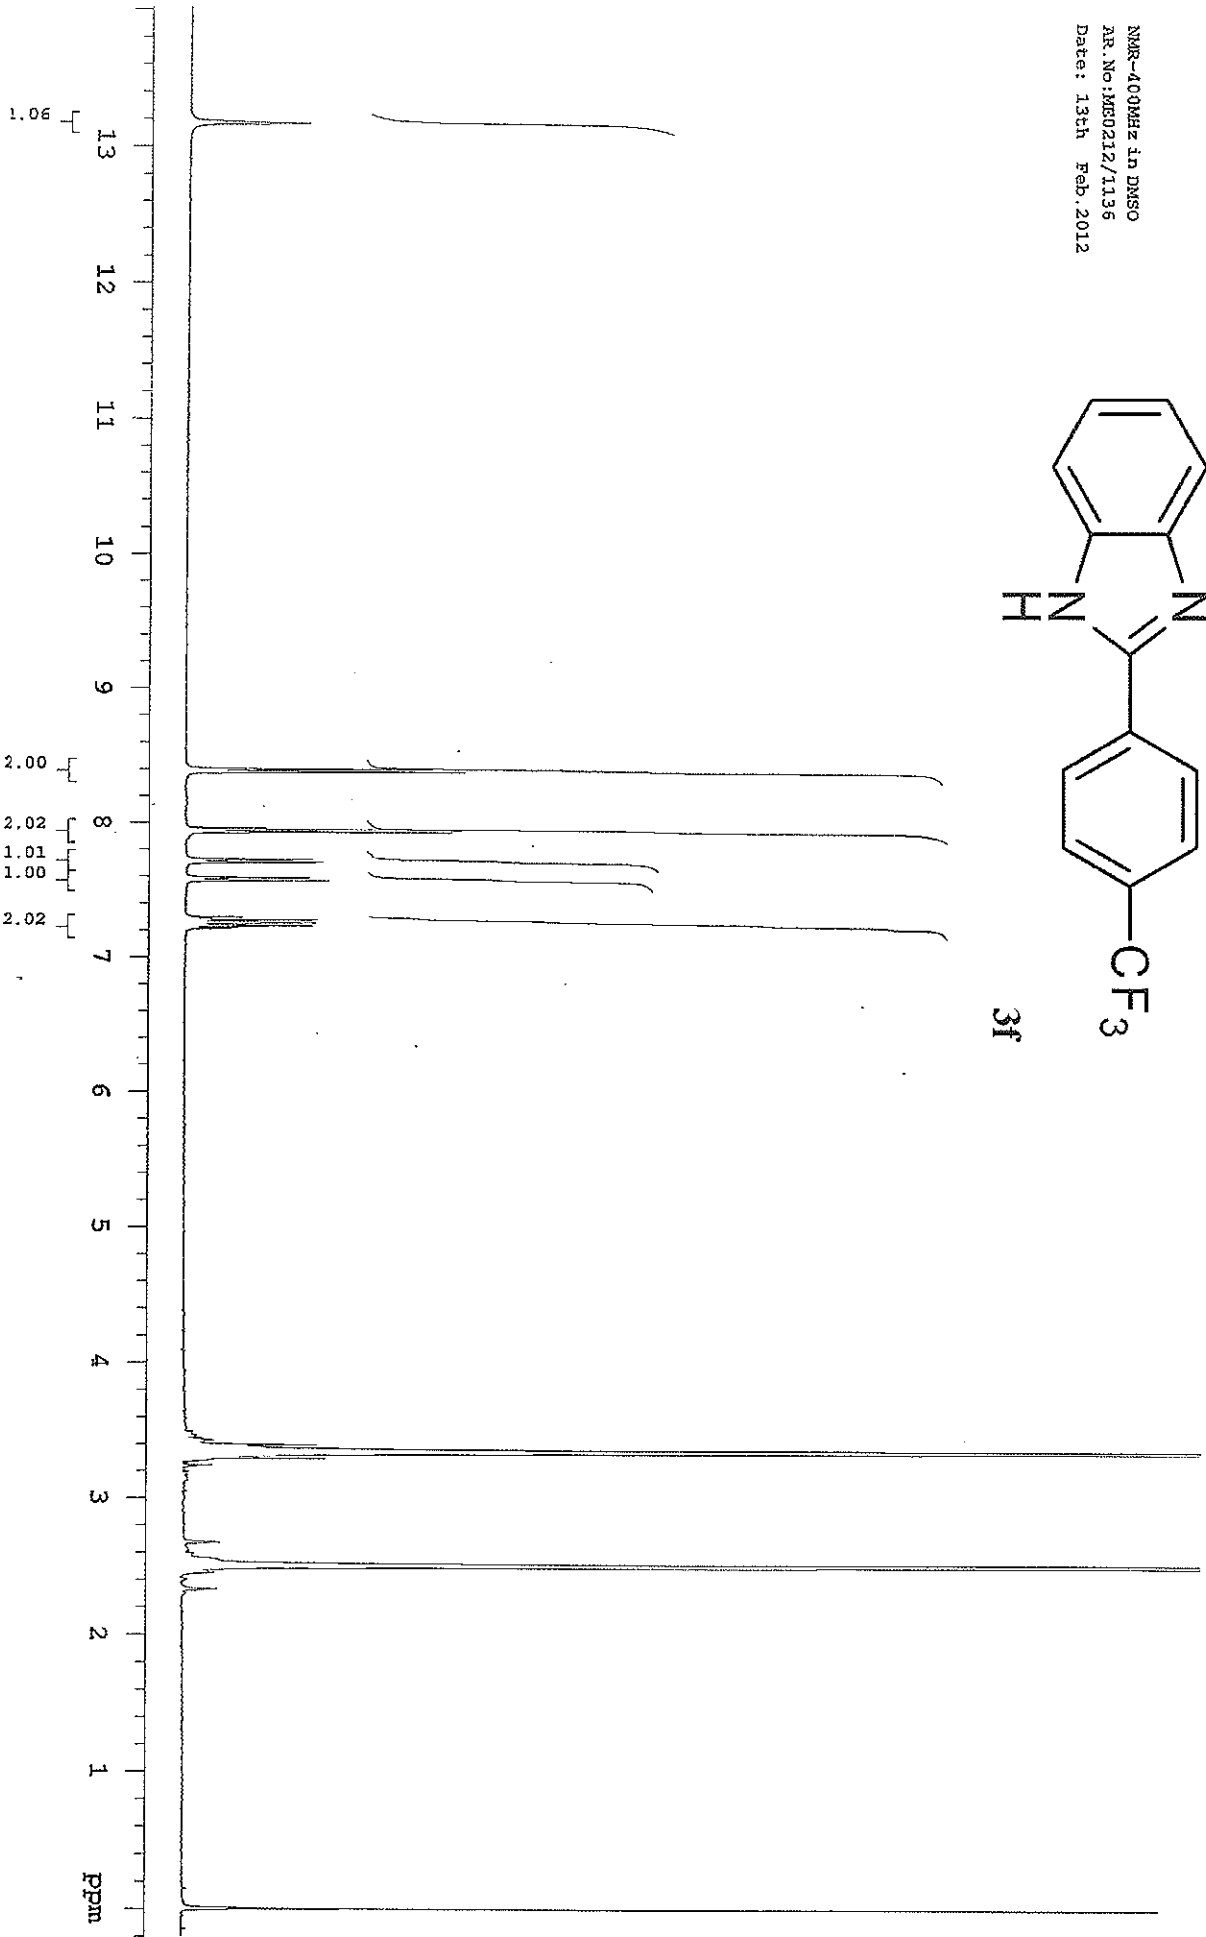

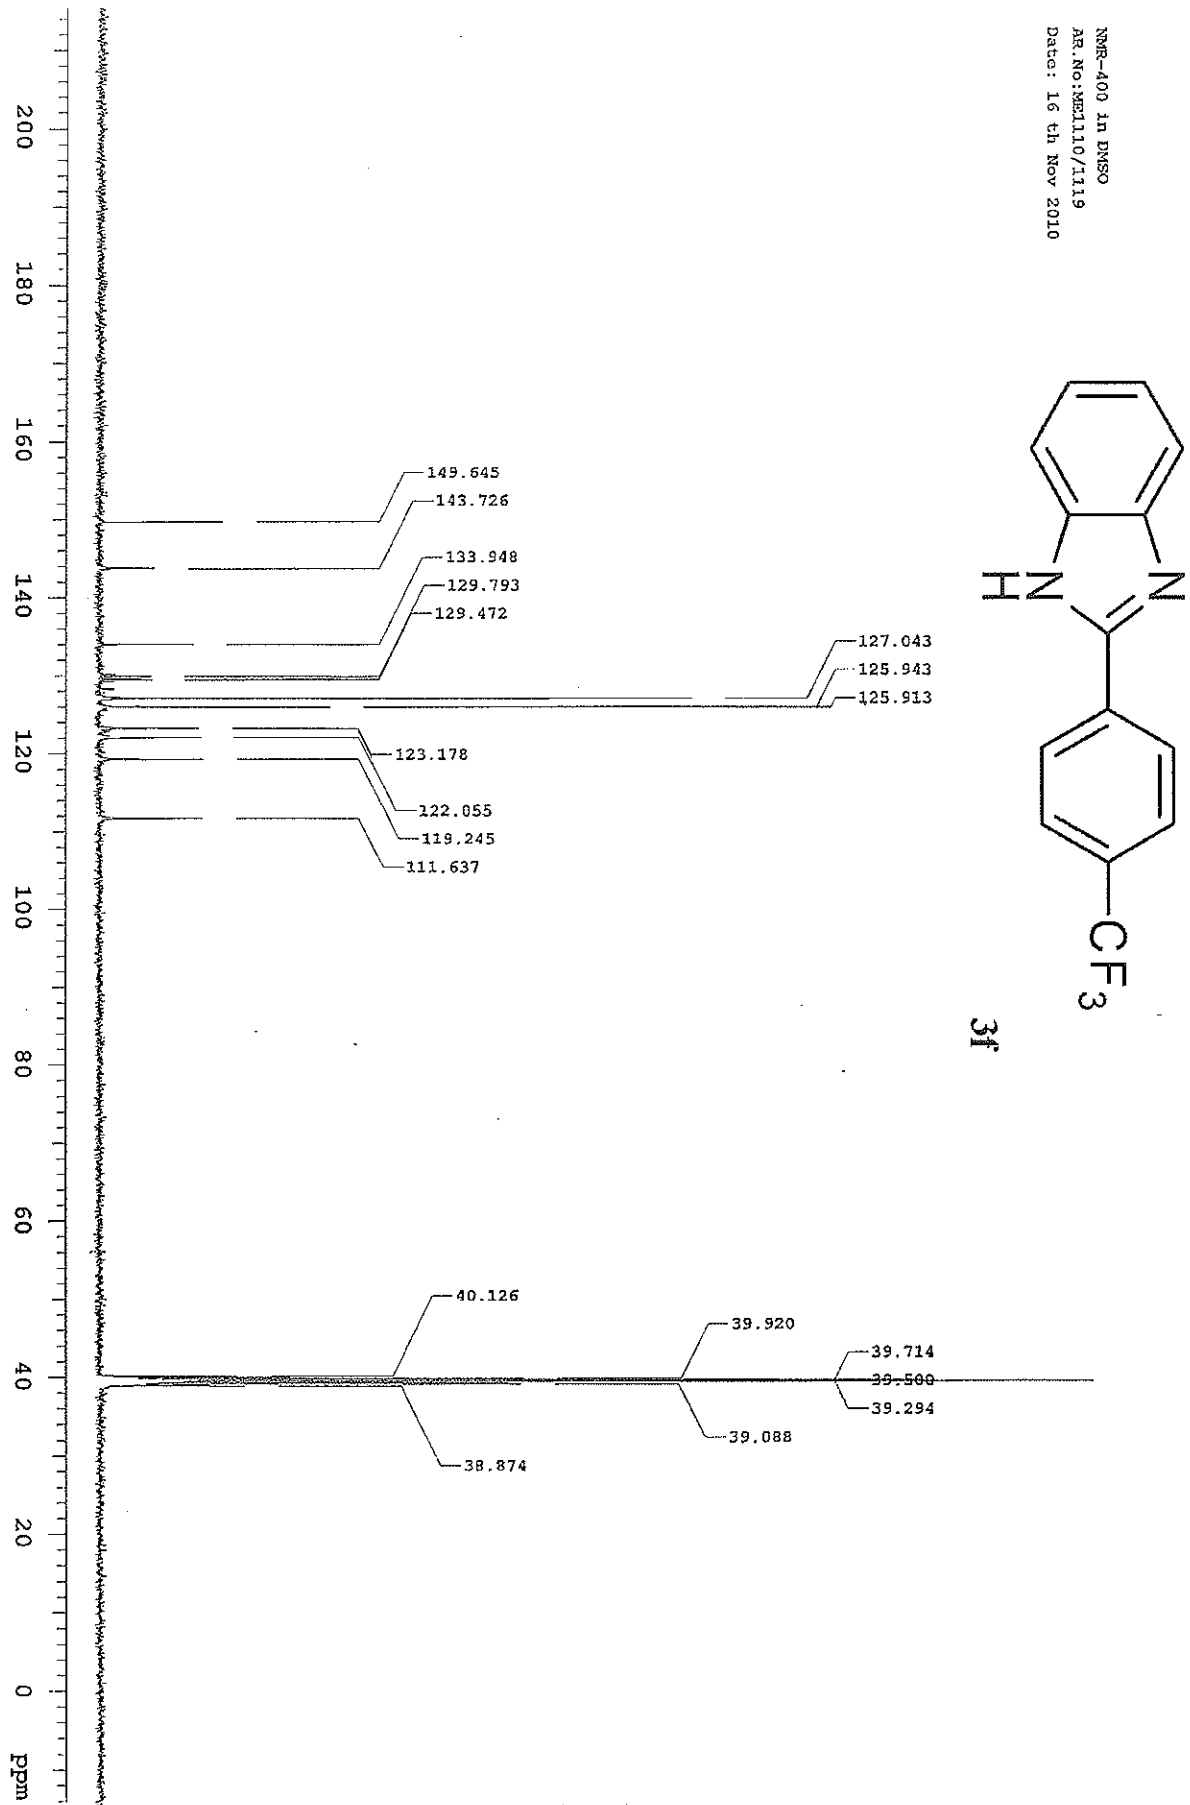

### Single Mass Analysis

Element prediction: Off

### Monoisotopic Mass, Even Electron Ions

19 formula(e) evaluated with 1 result(s) within limits (up to 4 best isotopic matches for each mass)  
Elements Used:

C: 0-20    H: 0-20    N: 0-2    F: 0-3

Dr.Reddy's Laboratories Ltd, ARD,TDC-1

UT0312\_17 32 (0.588) Cm (30:34-45:46x0.010)

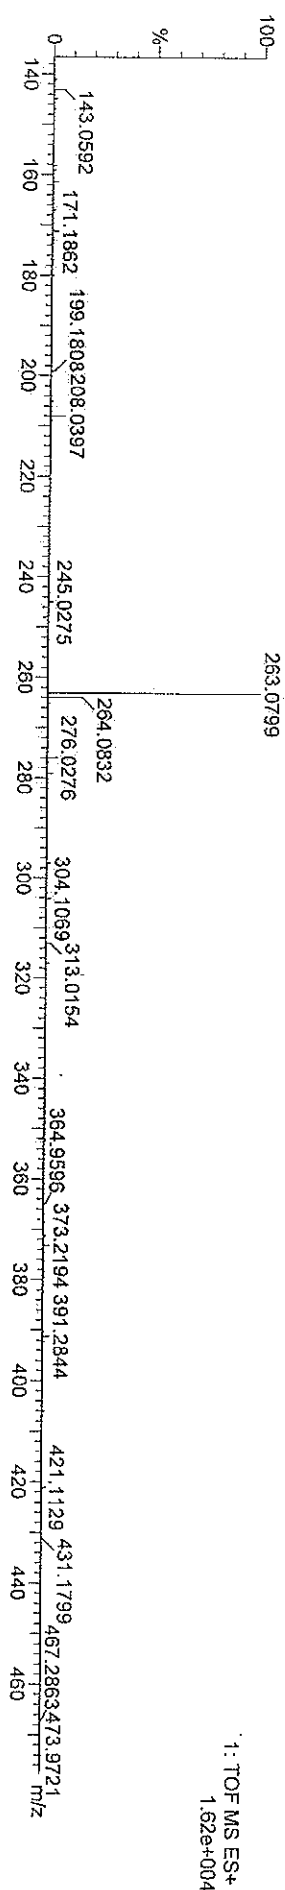

|          |            |     |     |     |       |               |  |  |  |
|----------|------------|-----|-----|-----|-------|---------------|--|--|--|
| Minimum: |            |     |     |     |       |               |  |  |  |
| Maximum: |            |     | 5.0 | 5.0 | -1.0  |               |  |  |  |
|          |            |     |     |     | 80.0  |               |  |  |  |
| Mass     | Calc. Mass | mDa | PPM | DBE | 1-Fit | Formula       |  |  |  |
| 263.0799 | 263.0796   | 0.3 | 1.1 | 9.5 | 0.5   | C14 H10 N2 F3 |  |  |  |

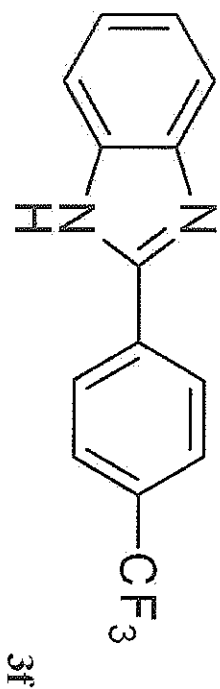

Copies of spectra

NMR-400MHz 4h DMSO  
AR.No:ME0710/933  
Date:13th July 2010

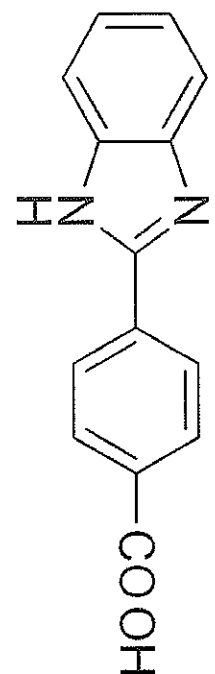

3g

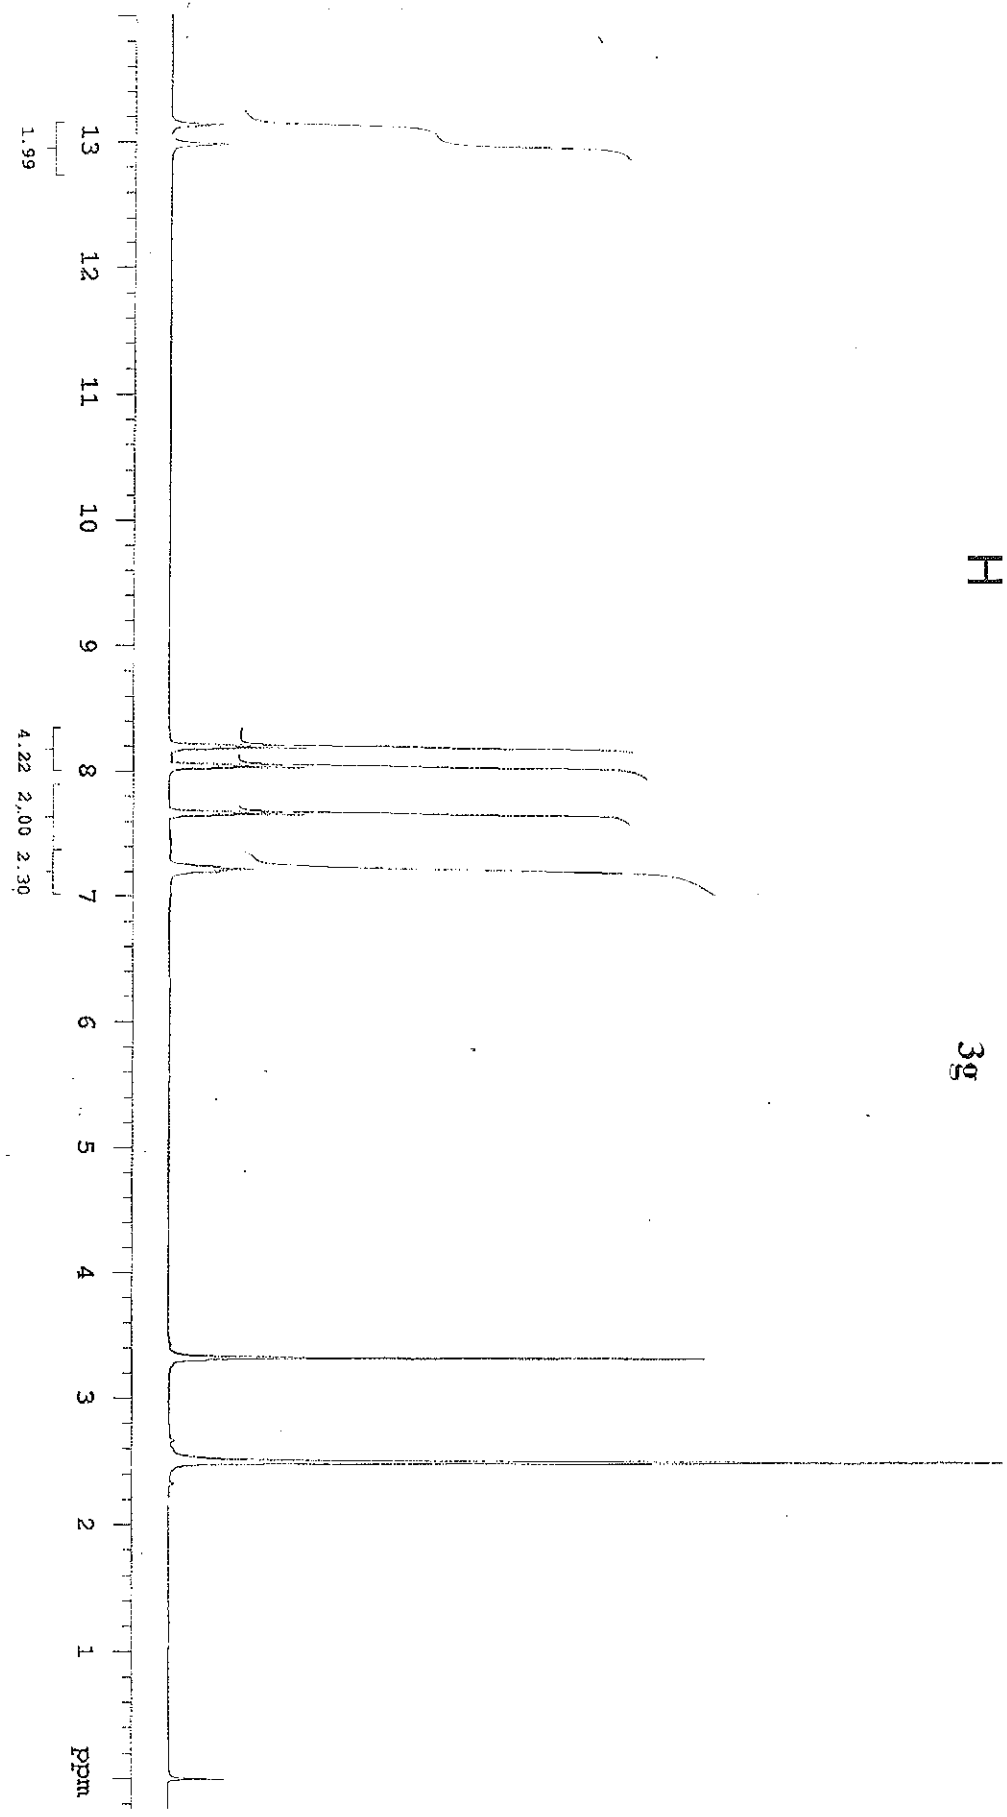

Copies of spectra

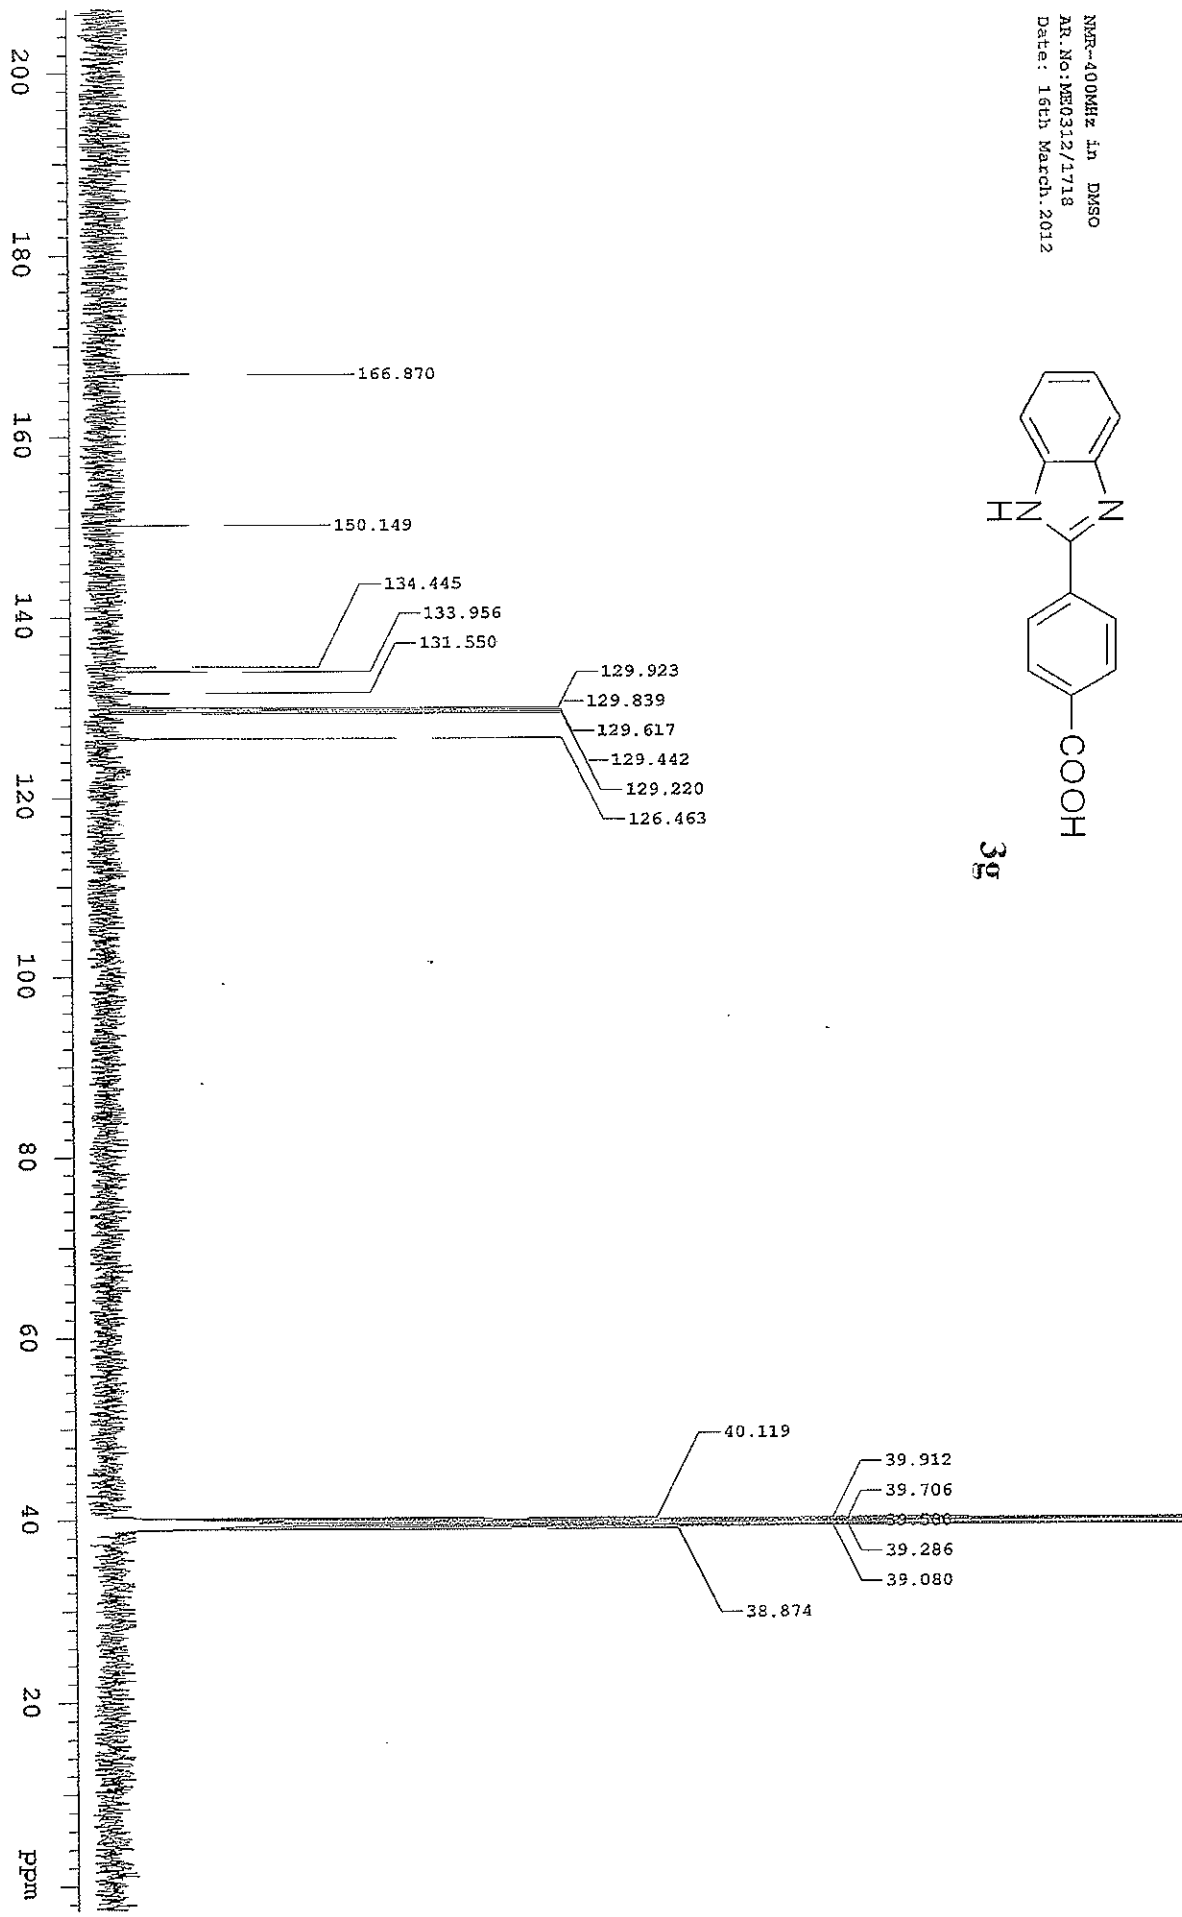

NMR-400MHz in DMSO  
AR.No:ME0312/1718  
Date: 16th March, 2012

Copies of spectra

Elemental Composition Report

Single Mass Analysis

Tolerance = 5.0 PPM / DBE: min = -1.0, max = 80.0  
Element prediction: Off  
Number of isotope peaks used for i-FIT = 3

Monoisotopic Mass, Even Electron Ions  
17 formula(e) evaluated with 1 results within limits (up to 4 best isotopic matches for each mass)  
Elements Used:  
C: 0-20 H: 0-20 N: 0-2 O: 0-2

Dr. Reddy's Laboratories Ltd, ARD, TDC-1

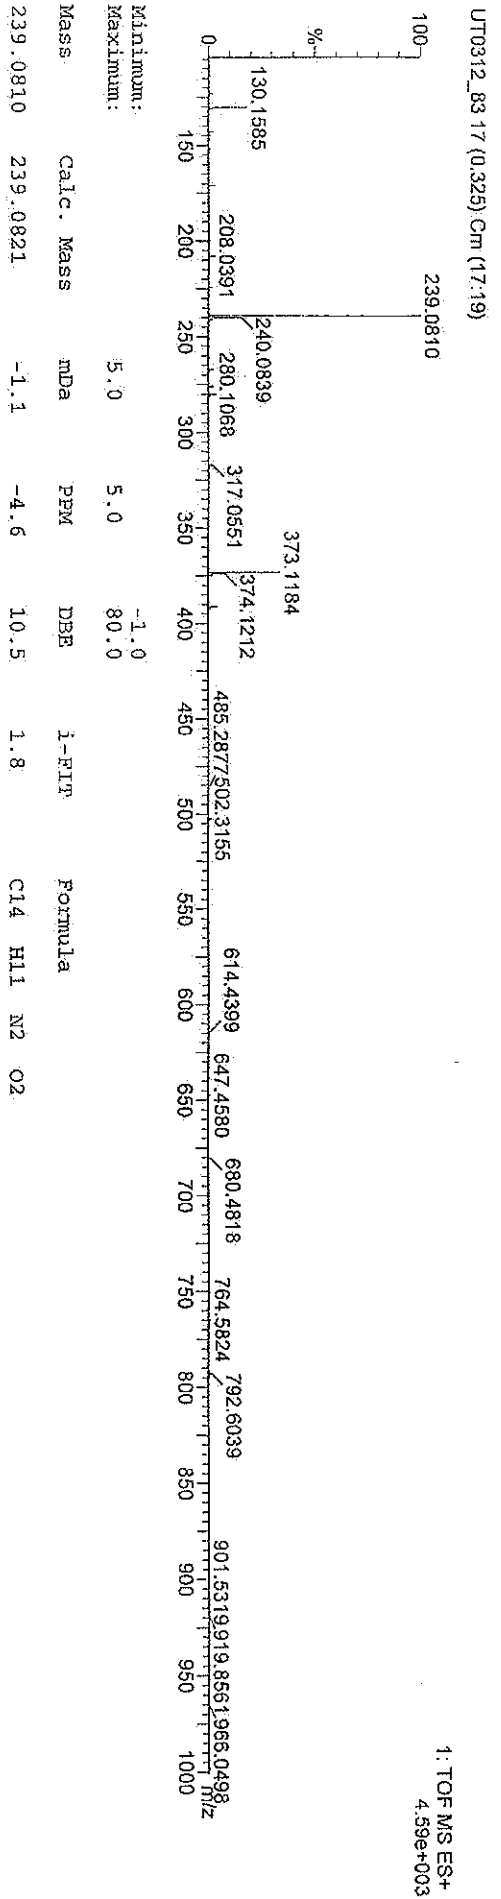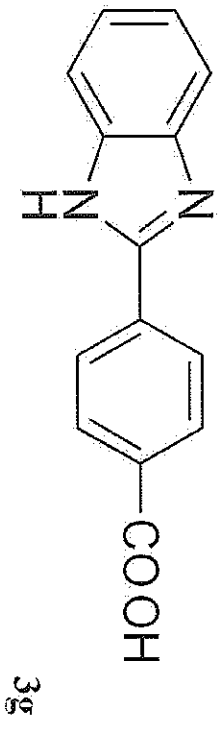

1H NMR-400 in DMSO  
AR.No:ME0411/2524  
Date: 26 th April, 2011

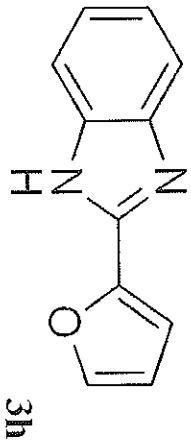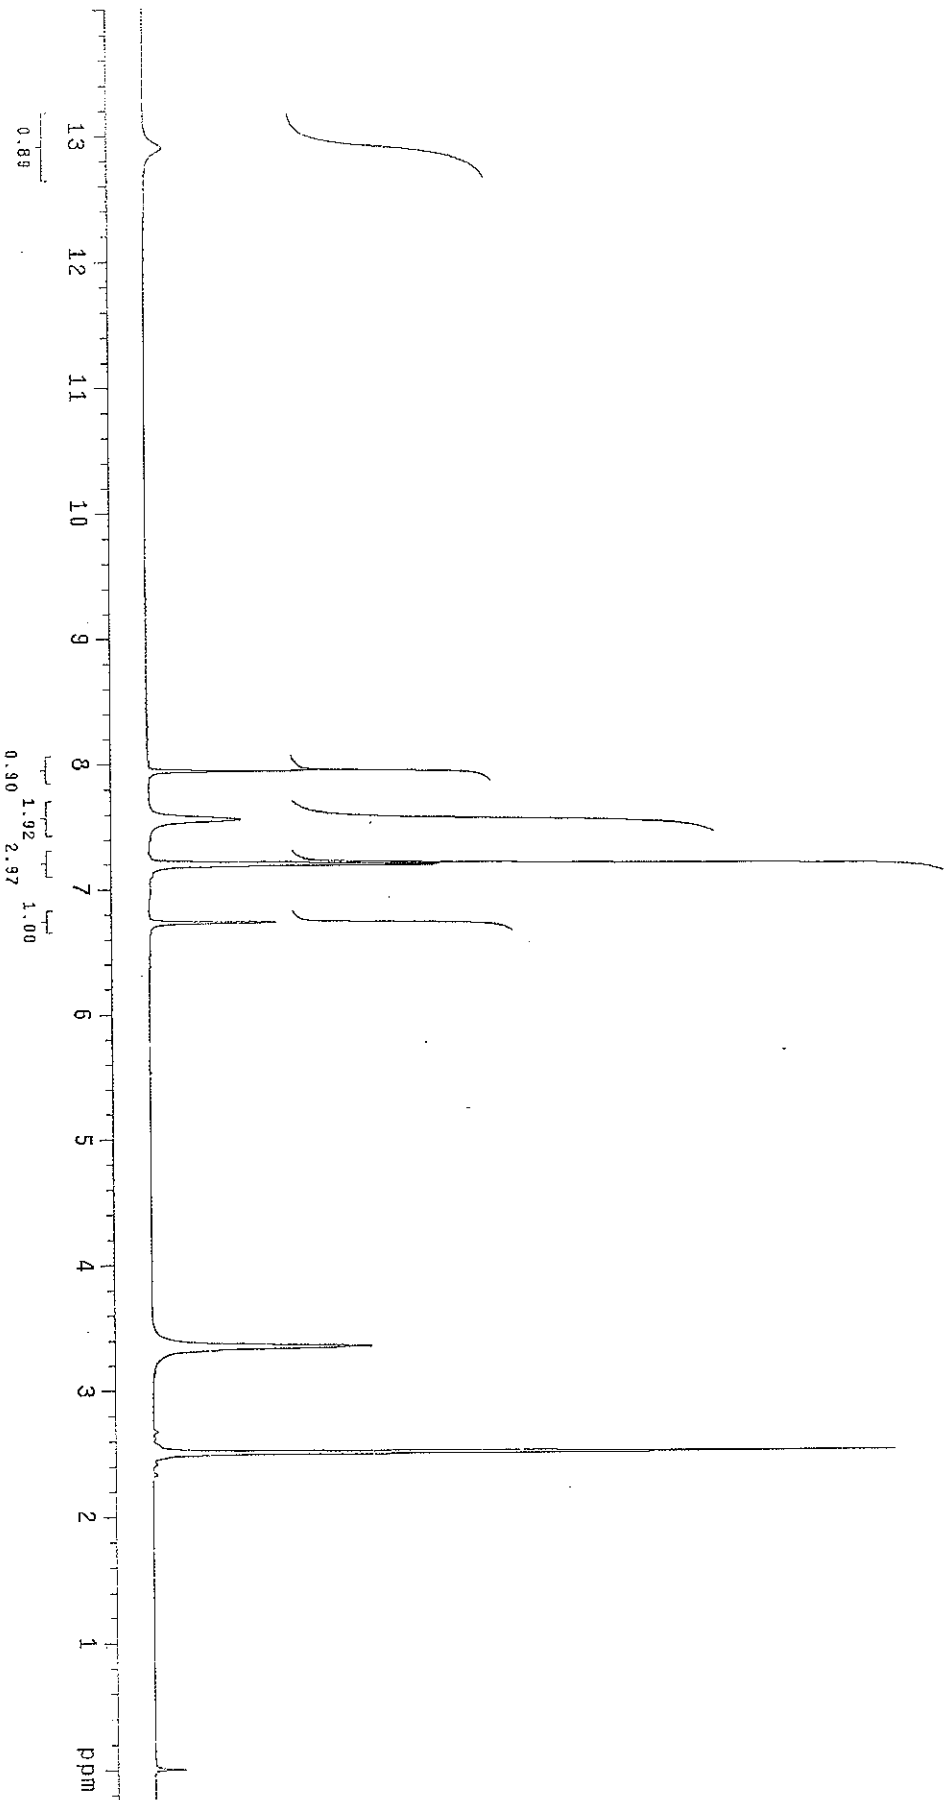



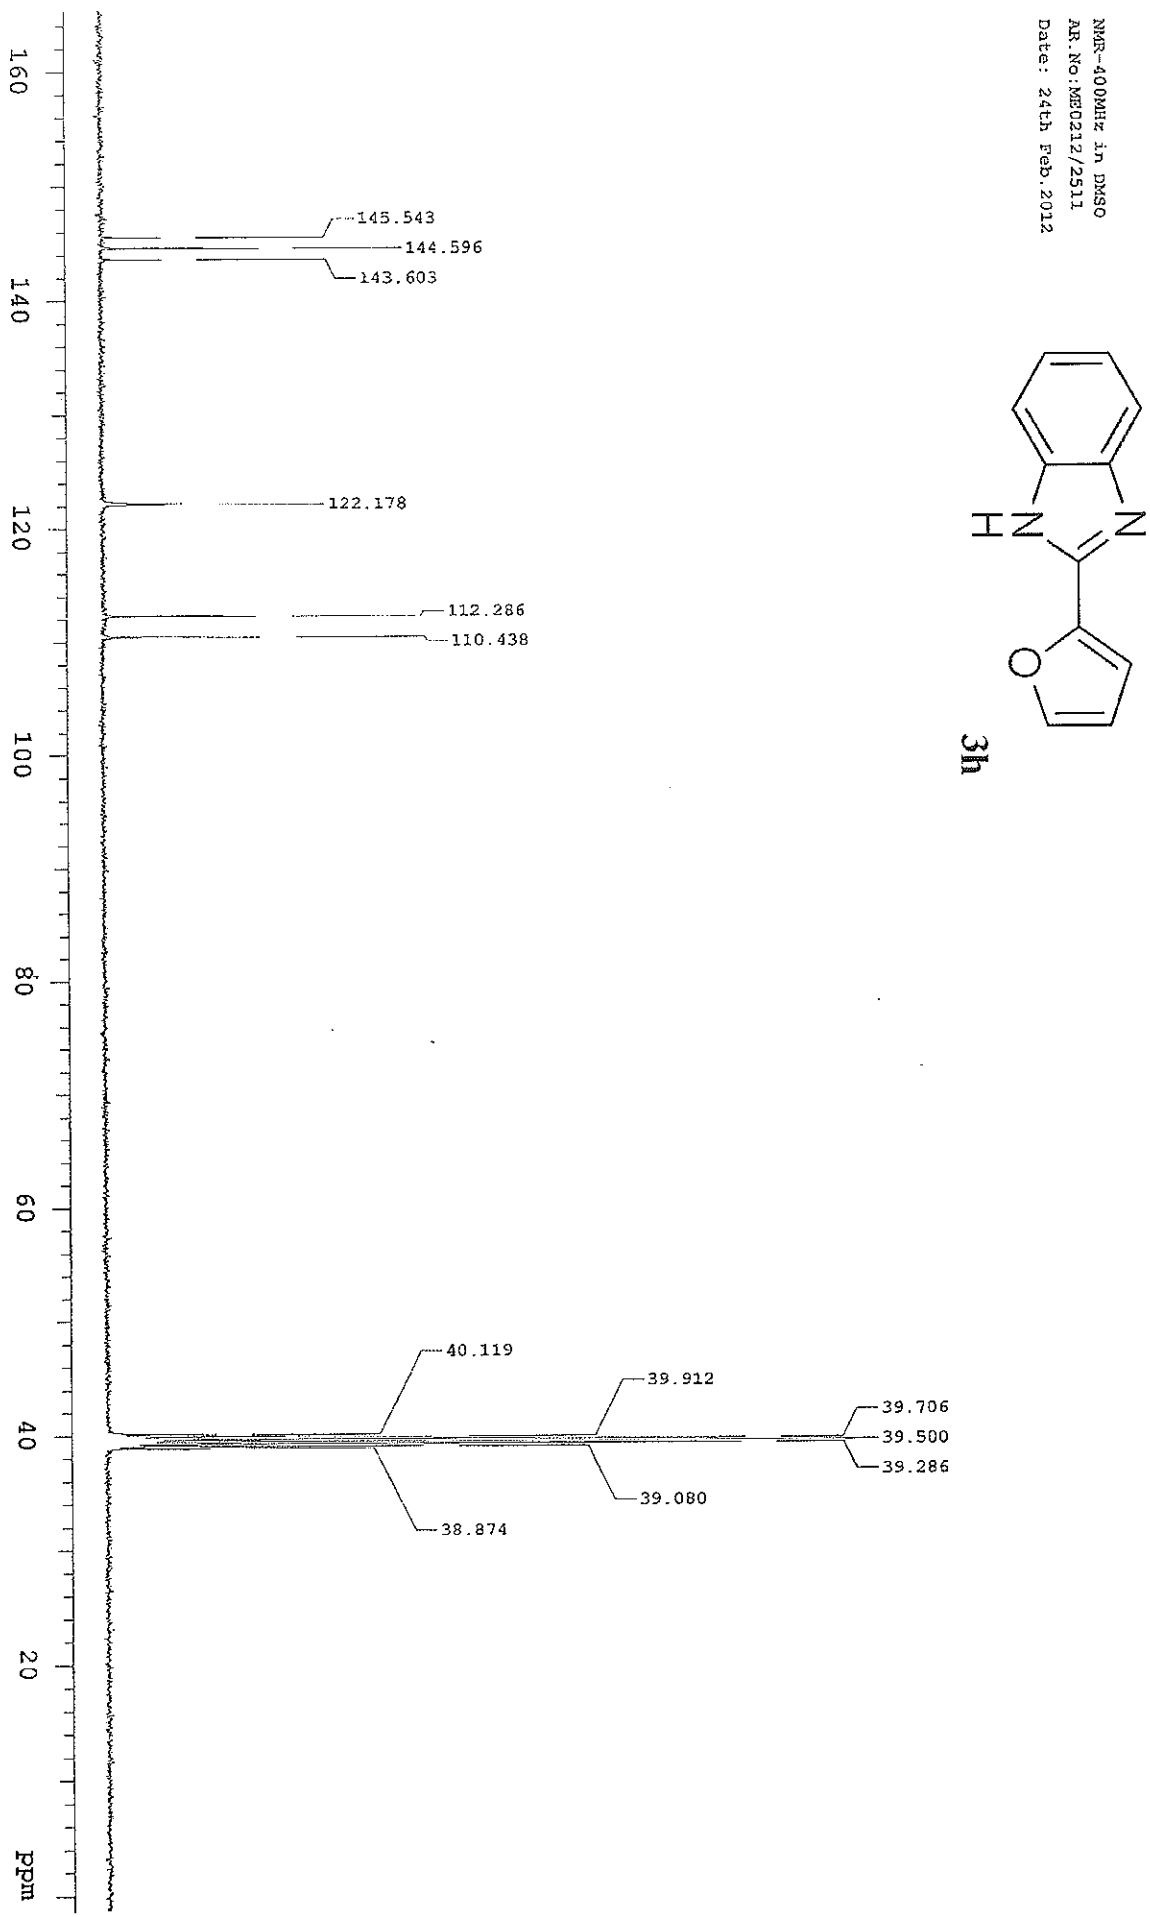

## Elemental Composition Report

### Single Mass Analysis

Tolerance = 5.0 PPM / DBE: min = -1.0, max = 80.0

Element prediction: Off

Number of isotope peaks used for i-FIT = 3

Monoisotopic Mass, Even Electron Ions

3 formula(e) evaluated with 1 results within limits (up to 4 best isotopic matches for each mass)

Elements Used:

C: 0-15 H: 0-20 N: 0-2

Dr.Reddy's Laboratories Ltd, ARD, TDC-1

UT0312\_04 18 (0.339) Cm (18.28)

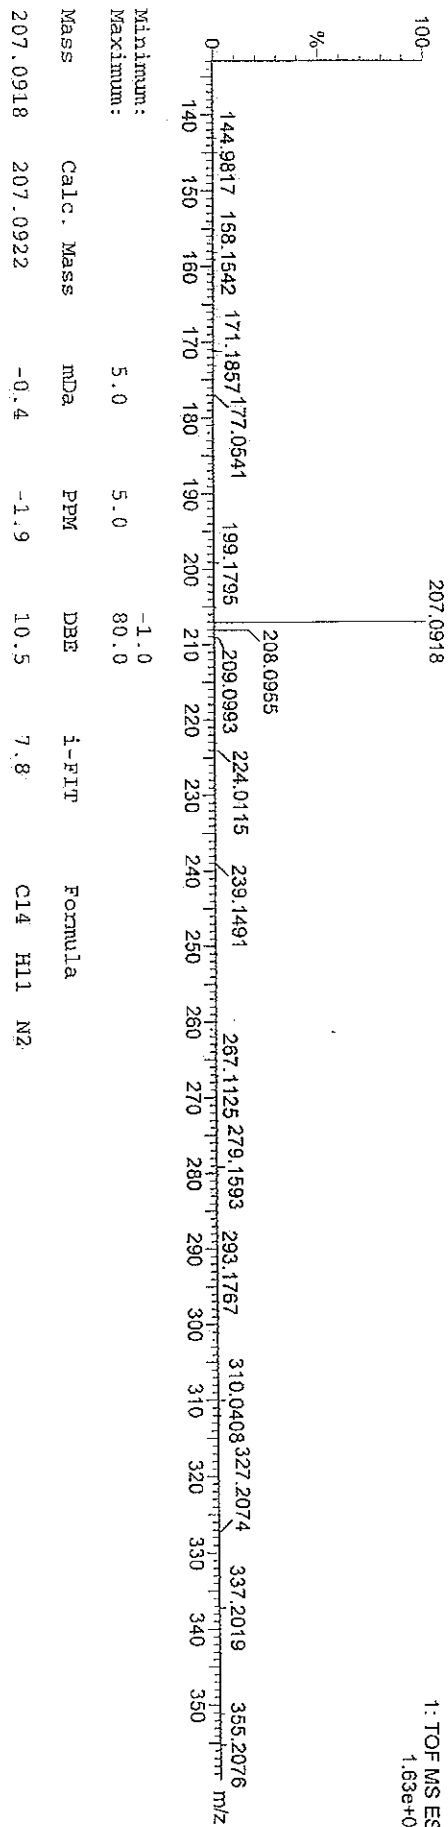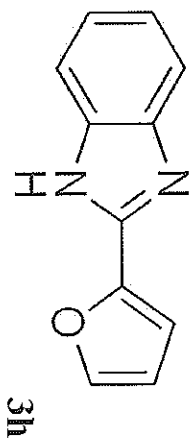

MR-400 in DMSO  
AR No: ME041/606  
Date: 8th April 2011

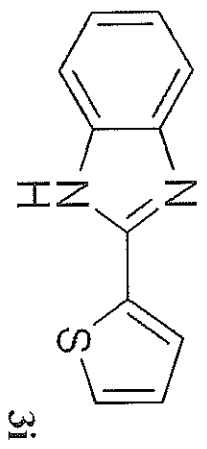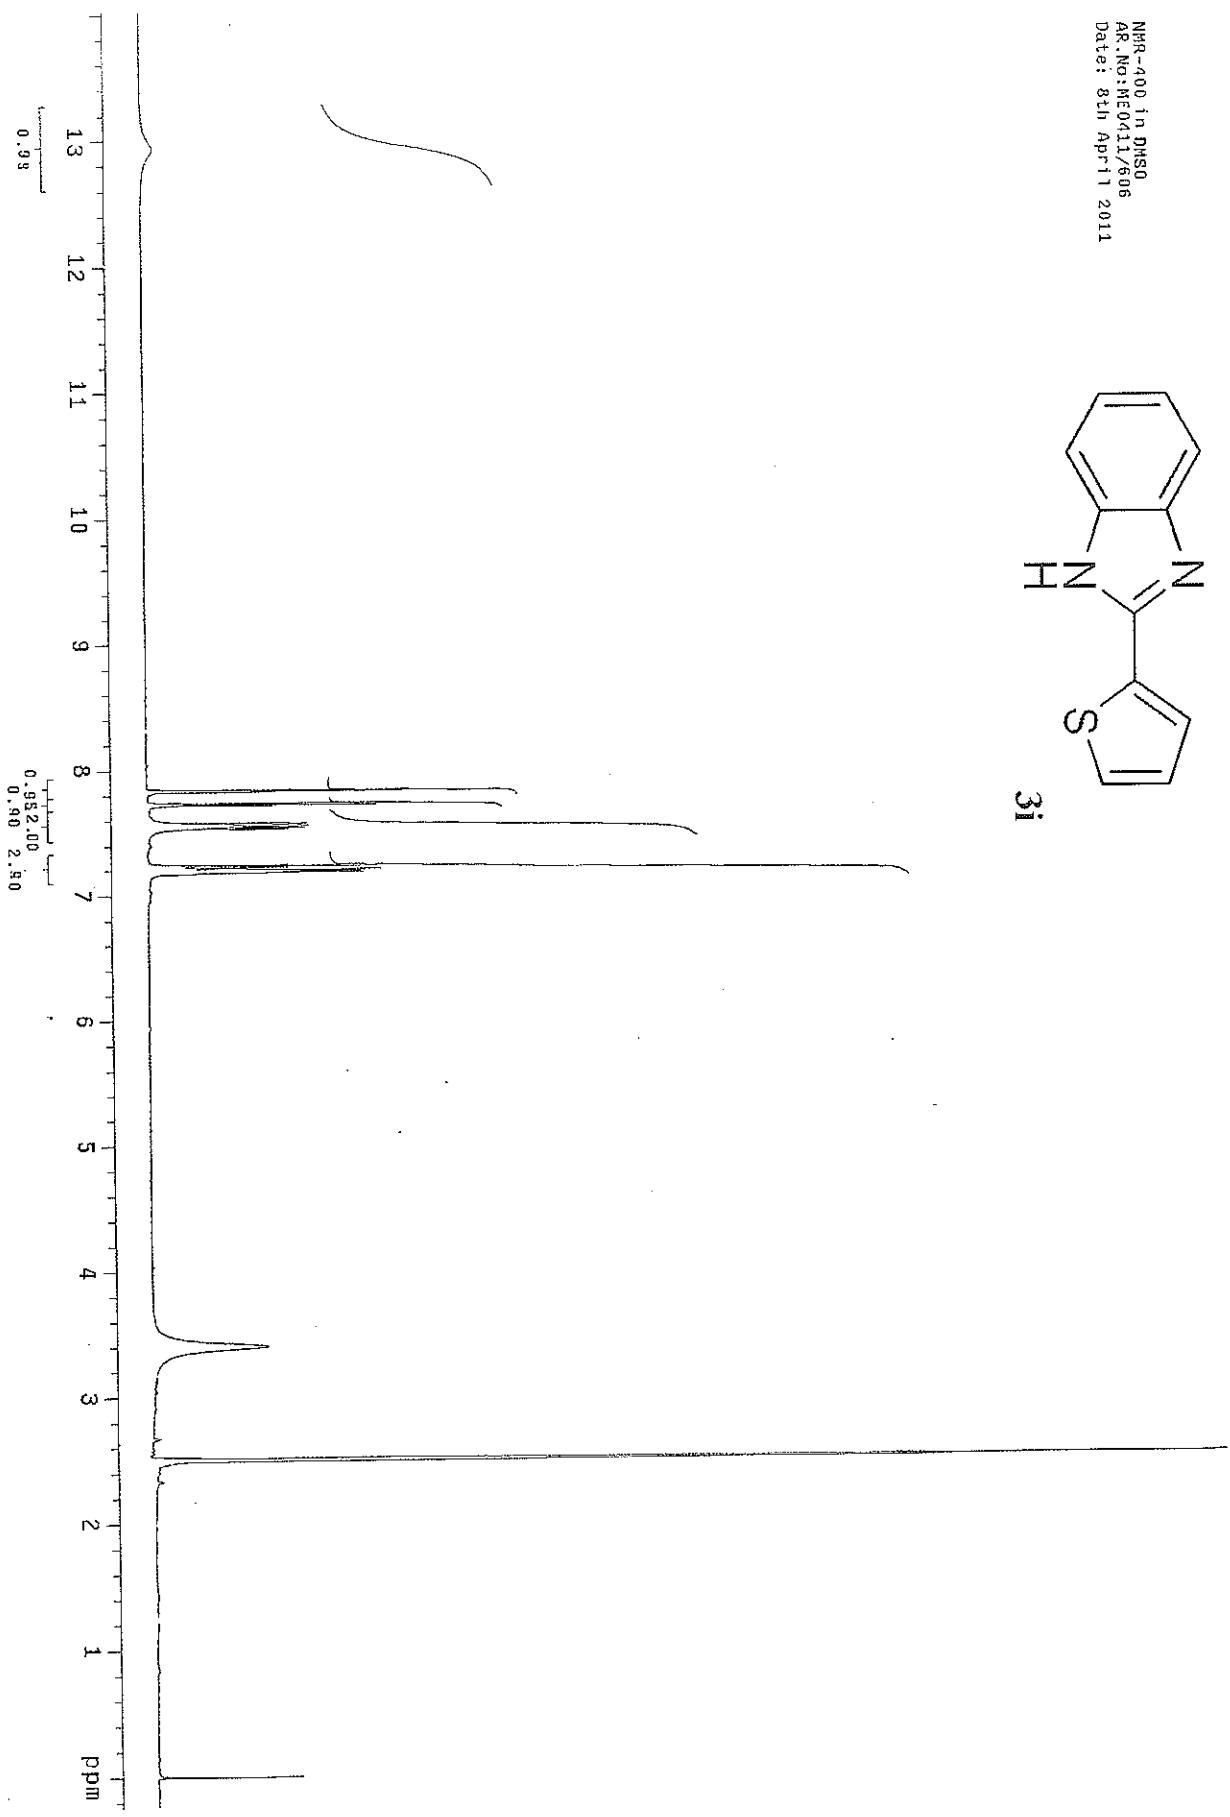

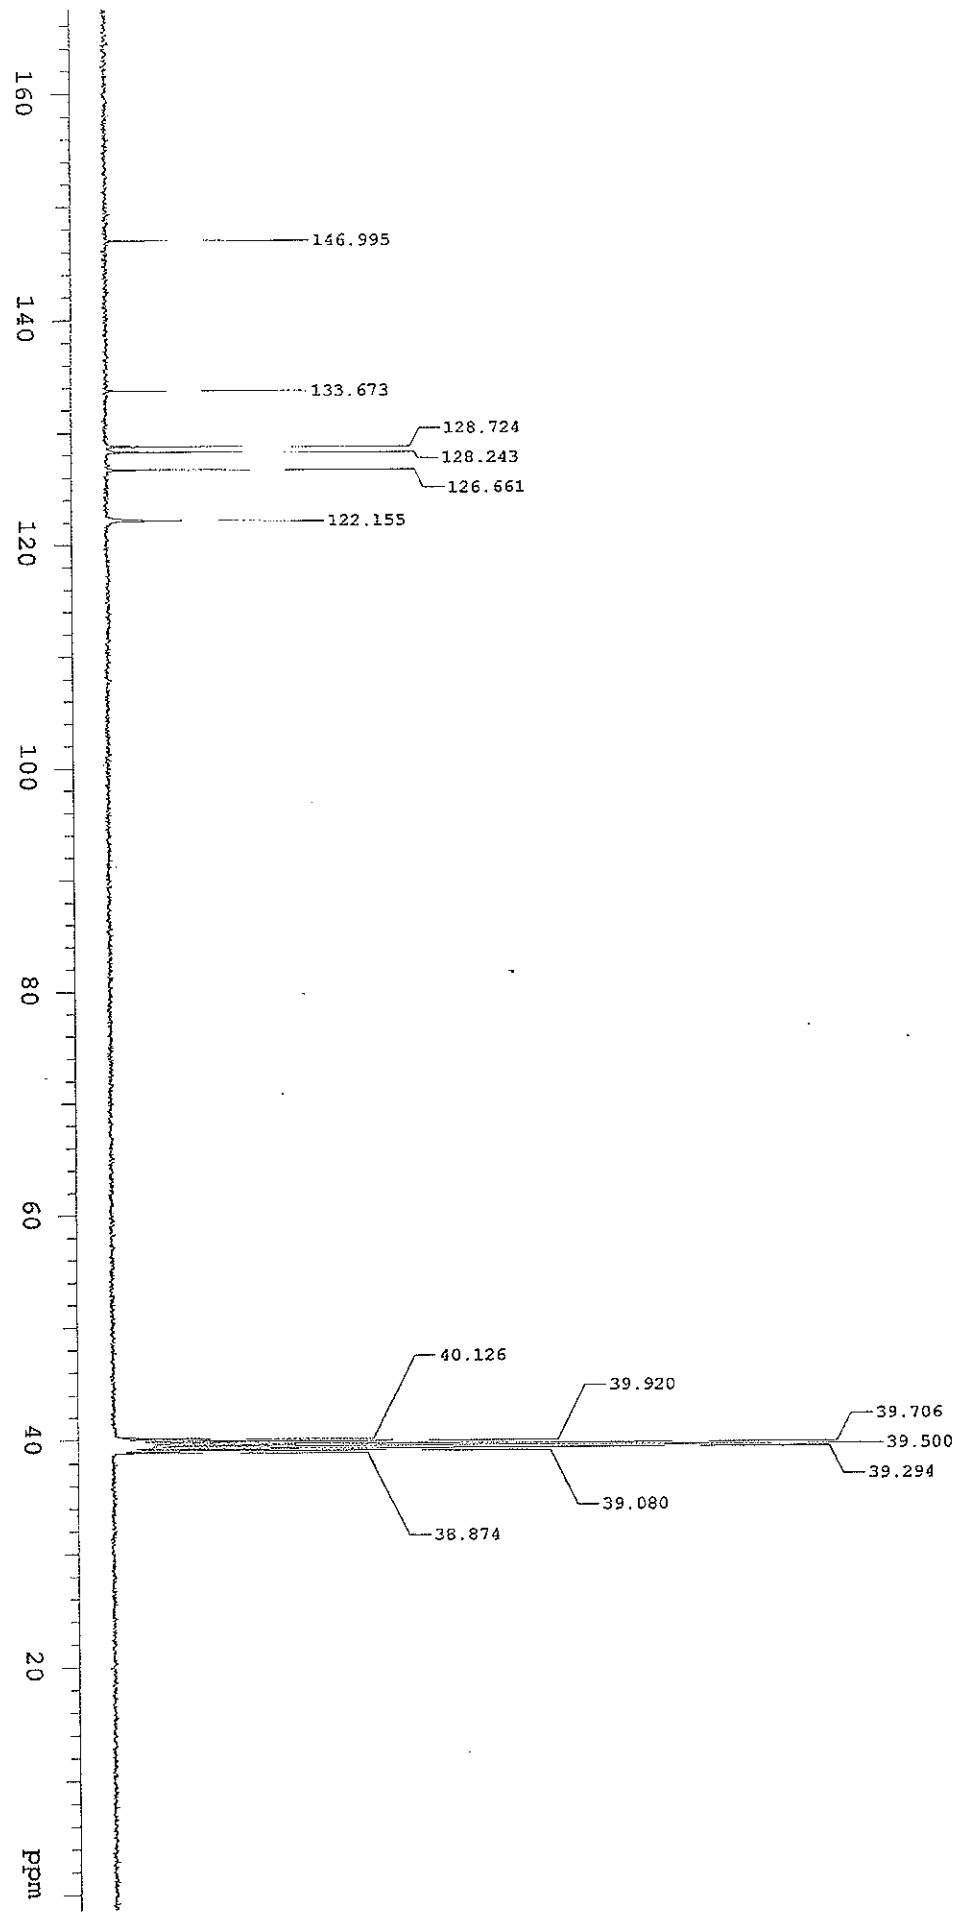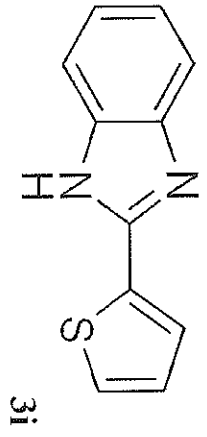

NMR-400MHz in DMSO  
Ac.No:ME0212/2513  
Date: 24th Feb. 2012

### Single Mass Analysis

Monoisotopic Mass, Even Electron Ions  
9 formula(e) evaluated with 1 results within limits (up to 4 best isotopic matches for each mass)  
Elements Used:  
C: 0-15 H: 0-20 N: 0-2 S: 0-1

UT0312\_05 18 (0.338) Cm (18:22-1:4x0.010)

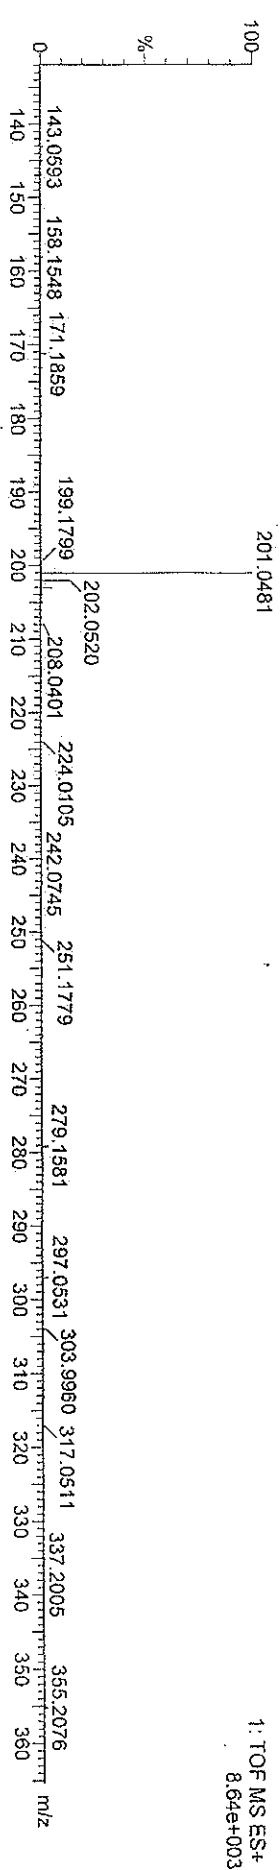

| Minimum:<br>Maximum: |            |      |      |              |       |             |
|----------------------|------------|------|------|--------------|-------|-------------|
|                      |            | 5.0  | 5.0  | -1.0<br>80.0 |       |             |
| Mass                 | Calc. Mass | mDa  | PPM  | DBE          | i-FIT | Formula     |
| 201.0481             | 201.0486   | -0.5 | -2.5 | 8.5          | 0.7   | C11 H9 N2 S |

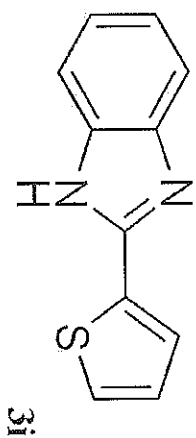

Copies of spectra

NMR-100 in DMSO  
AR.No:ME0511/3013  
Date: 27th May. 2011

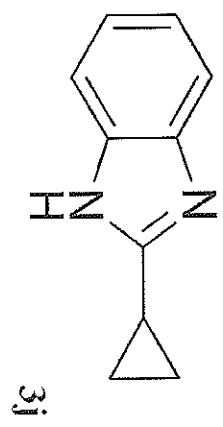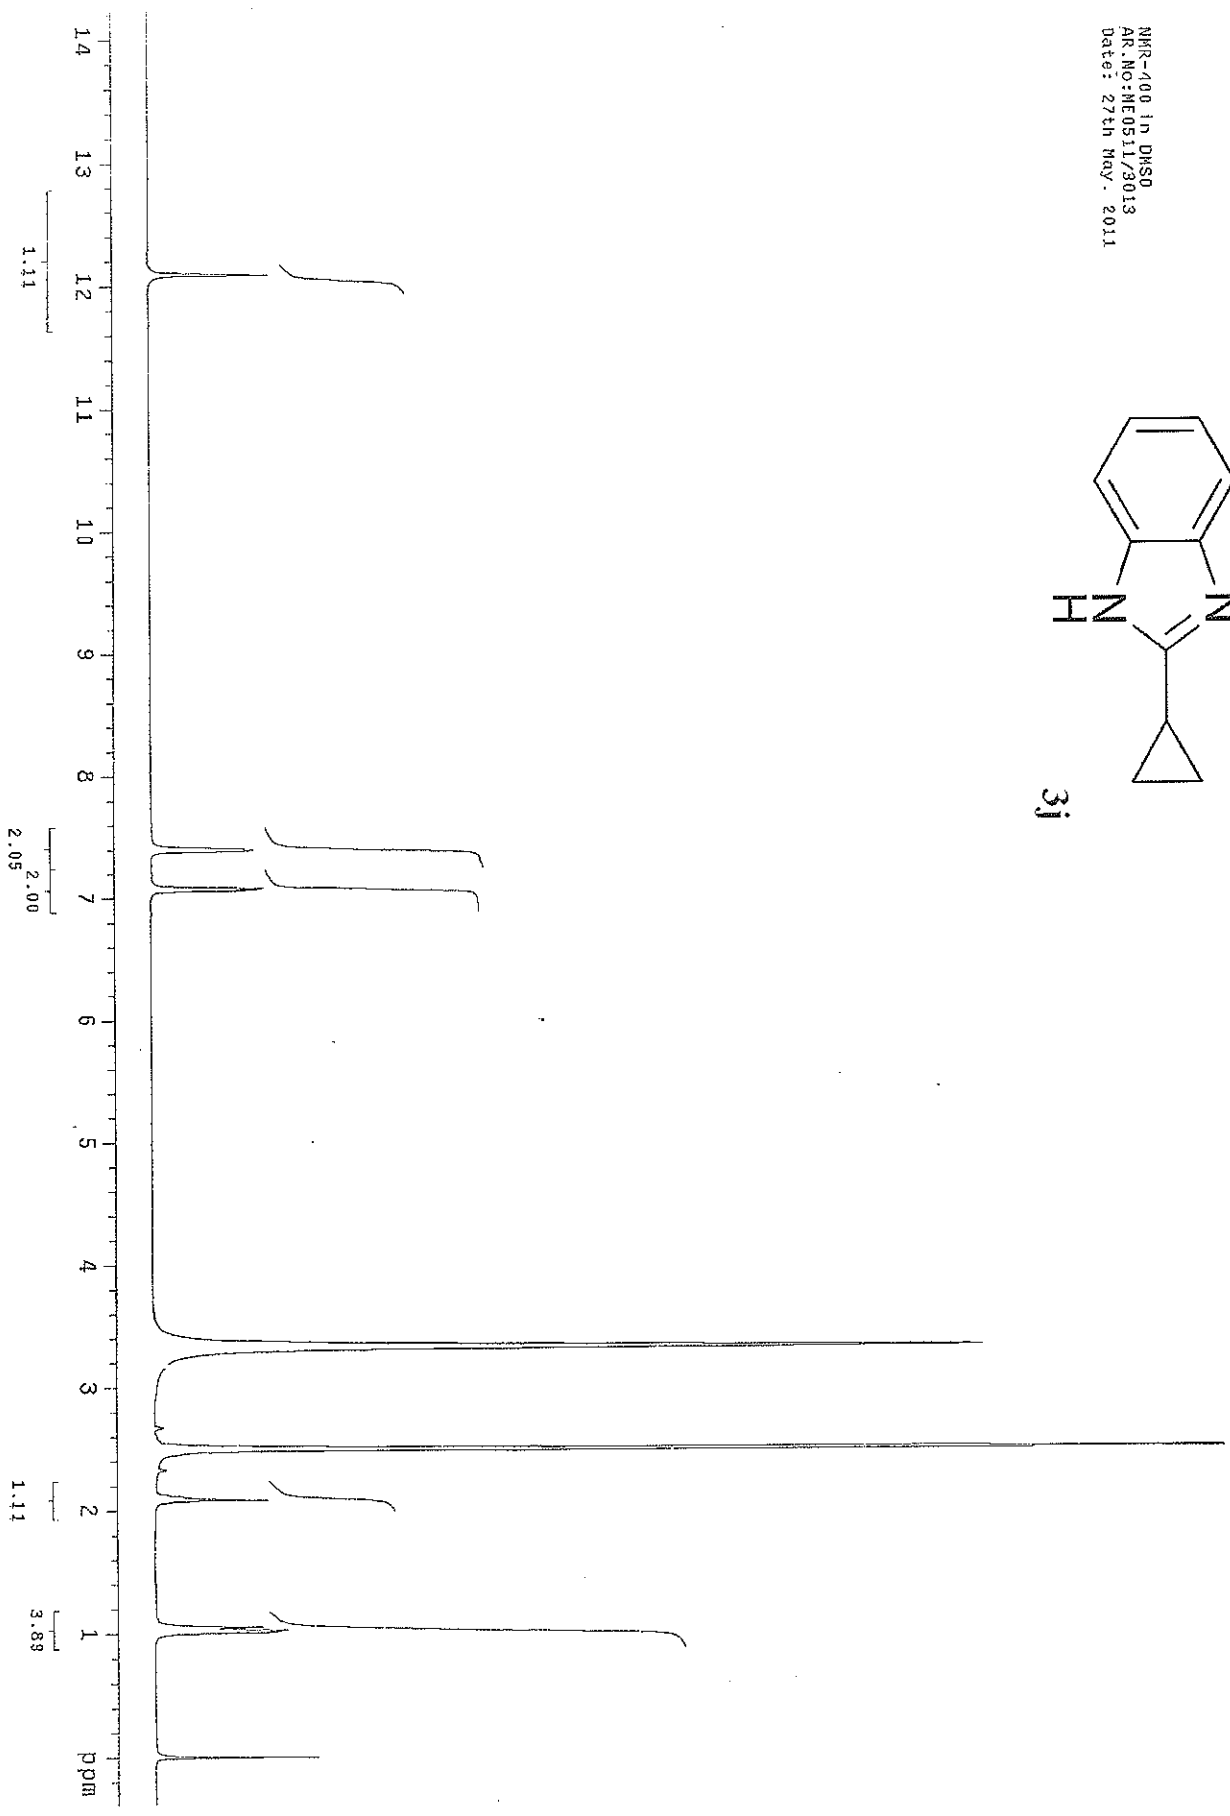

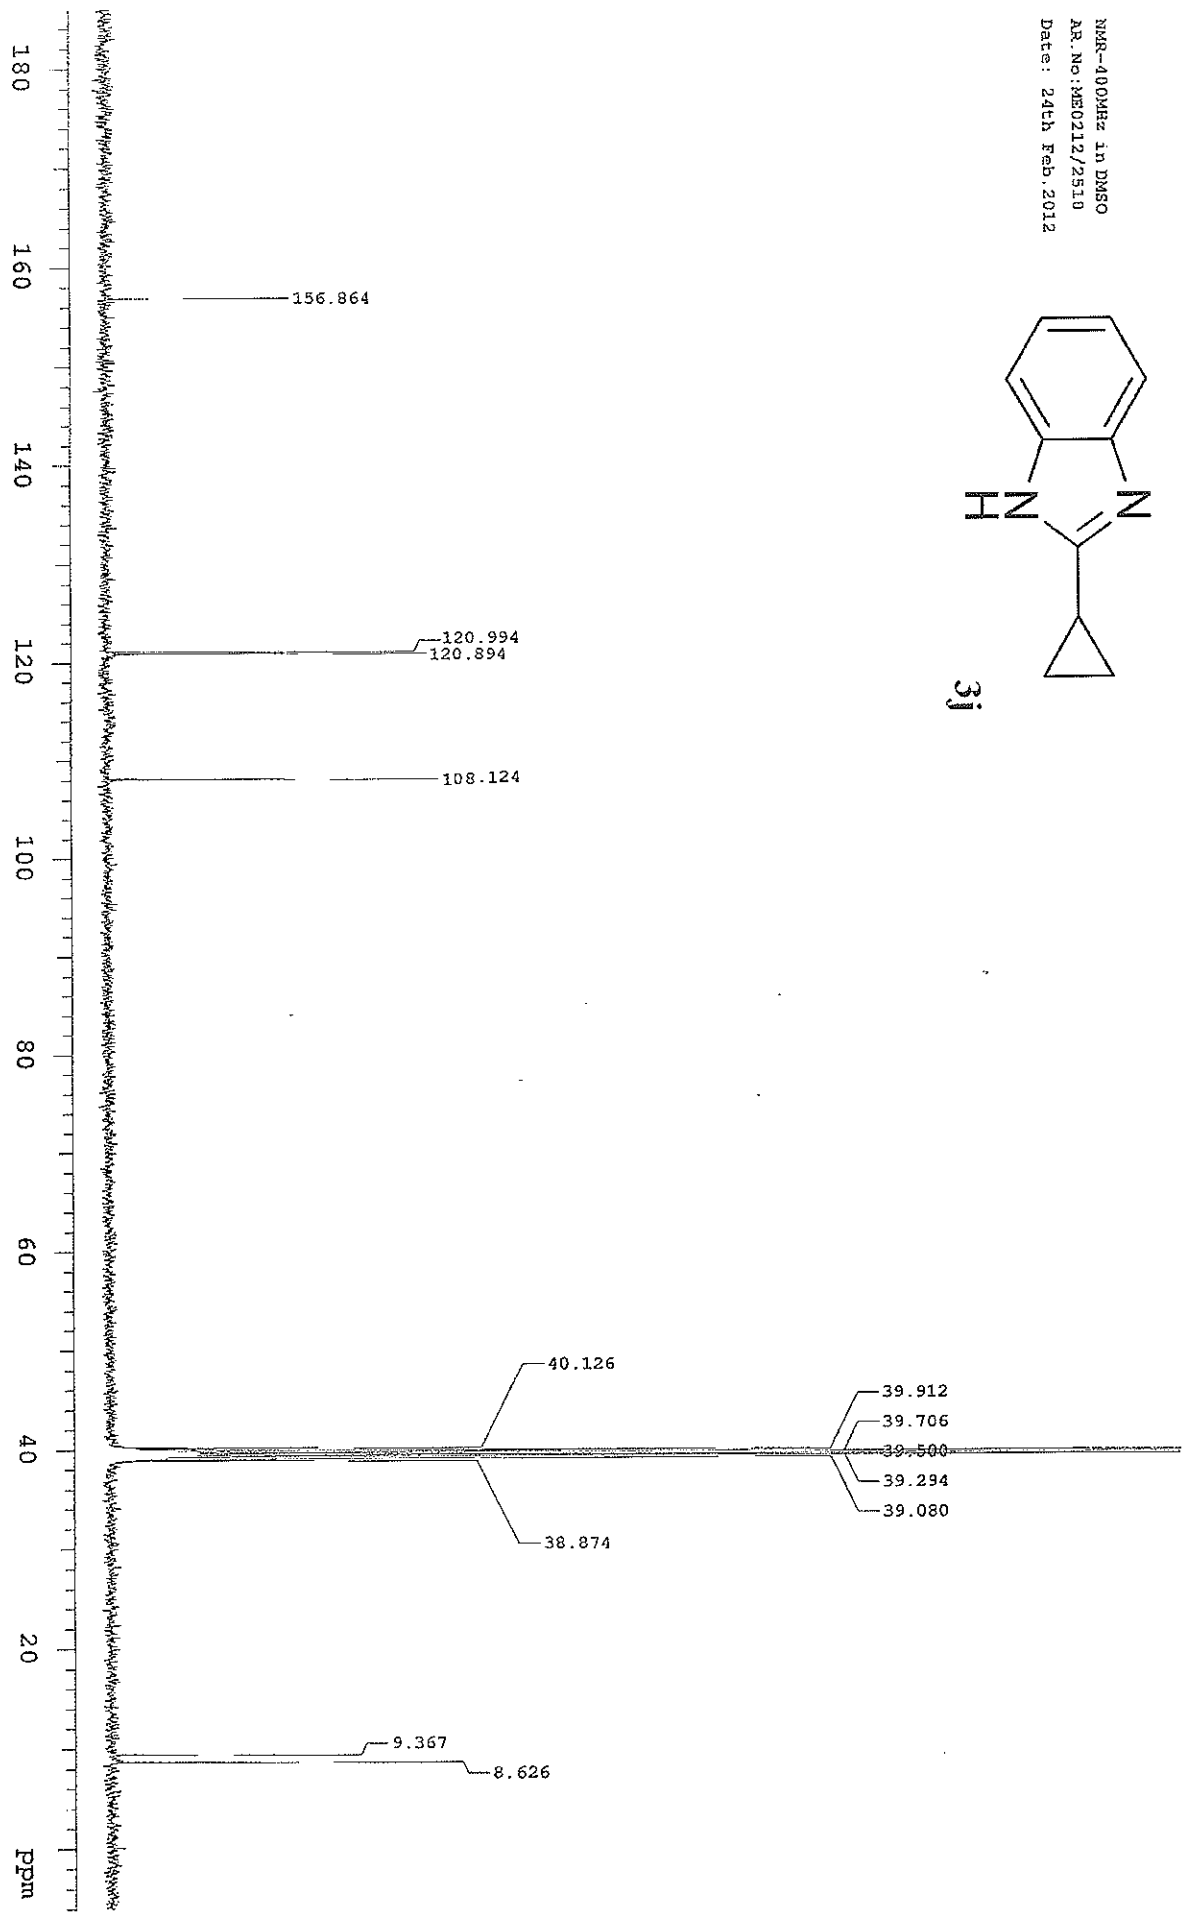

NMR-400MHz in DMSO  
AR.No:ME0212/2510  
Date: 24th Feb.2012

Copies of spectra

Elemental Composition Report

Single Mass Analysis

Tolerance = 5.0 PPM / DBE: min = -1.0, max = 80.0  
Element prediction: Off  
Number of isotope peaks used for i-FIT = 3

Monoisotopic Mass, Even Electron Ions  
6 formula(e) evaluated with 1 results within limits (up to 4 best isotopic matches for each mass)  
Elements Used:  
C: 0-15 H: 0-20 N: 0-2

Dr.Reddy's Laboratories Ltd, ARD, TDC-1

UT0312\_03 26 (0.486) Cm (25:31)

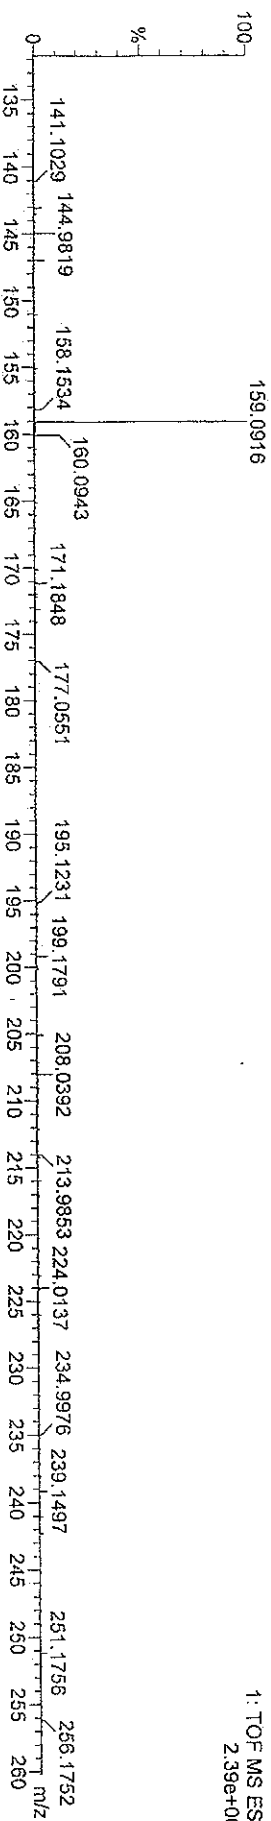



NMR-400 in DMSO  
AR No: ME1110/1196  
Date: 17 th Nov 2010

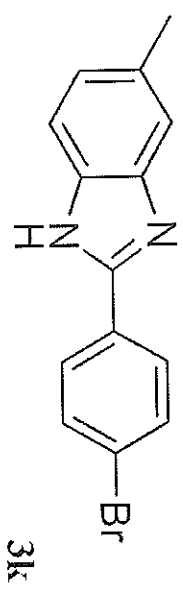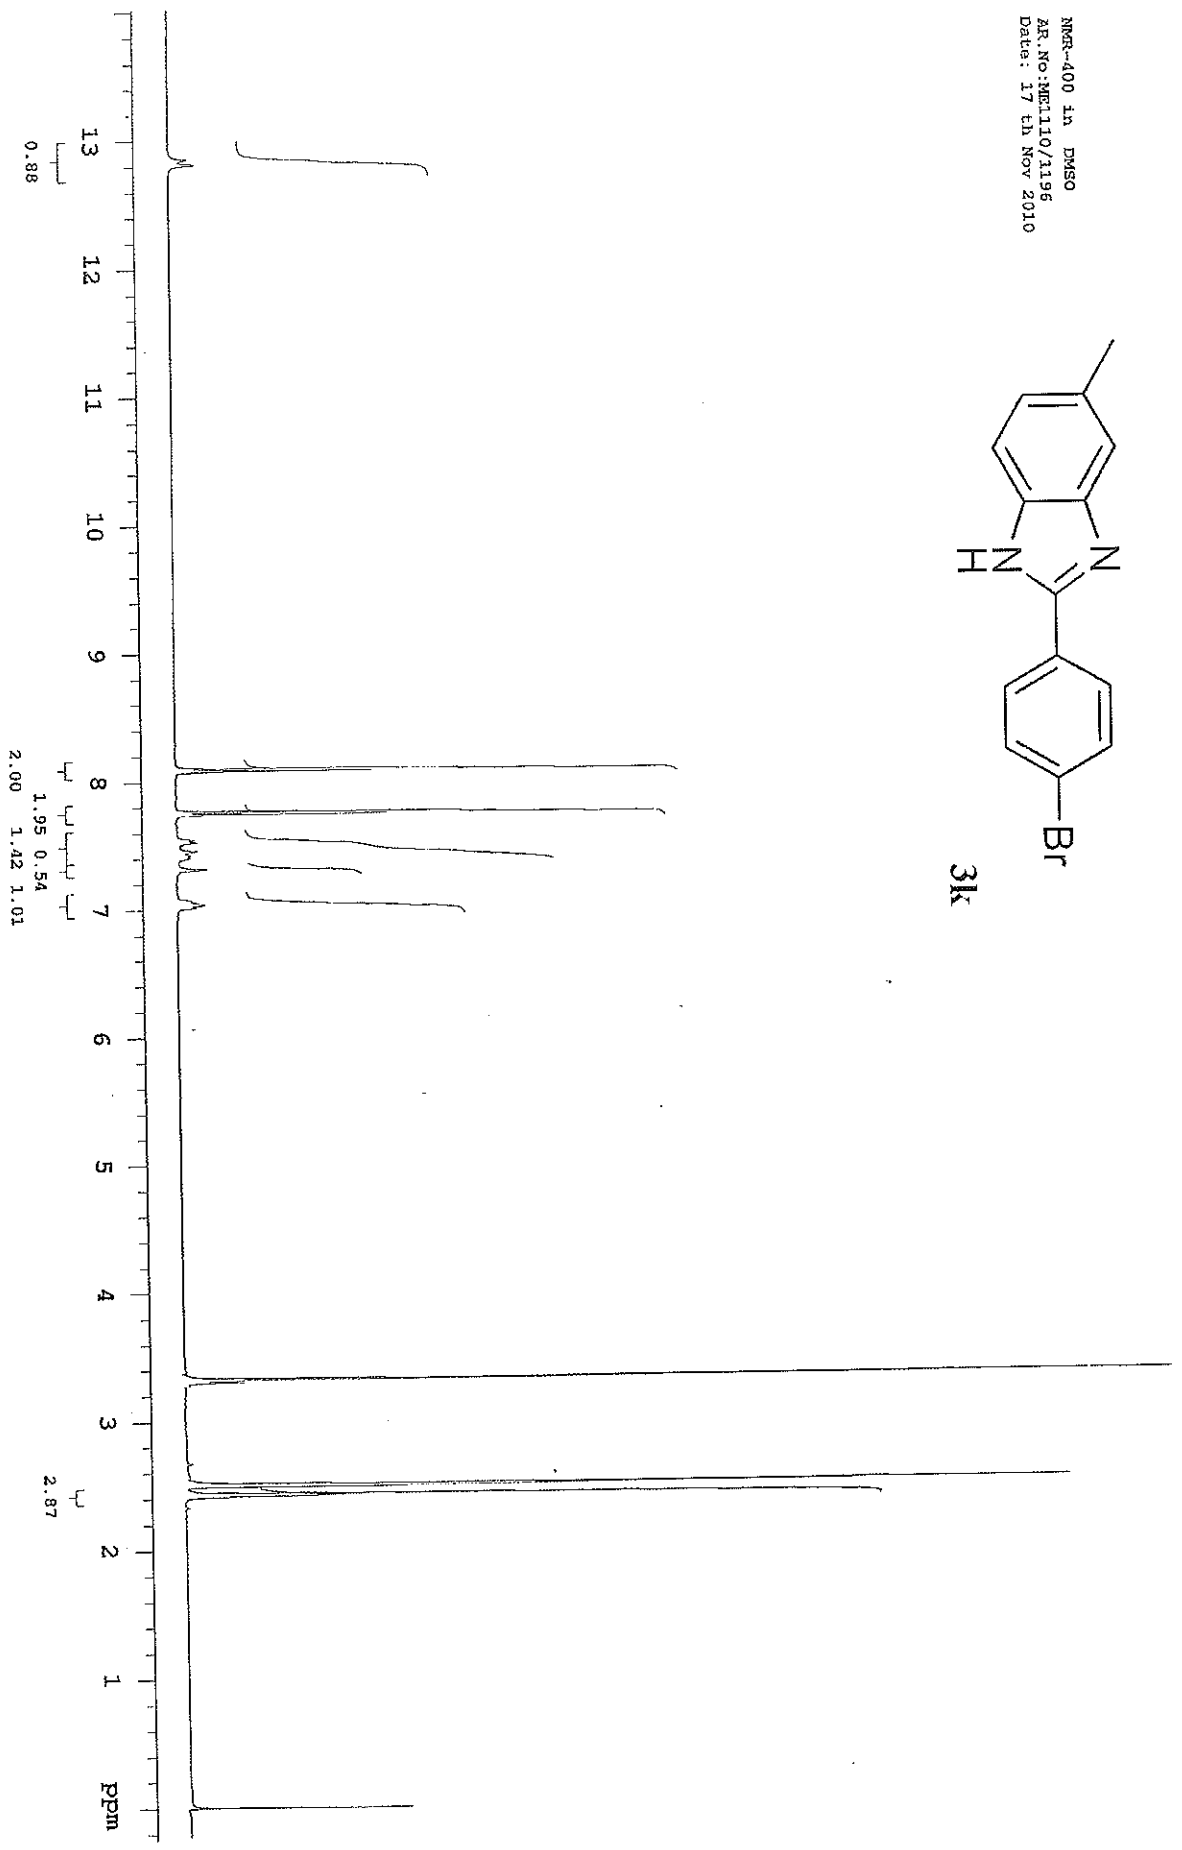

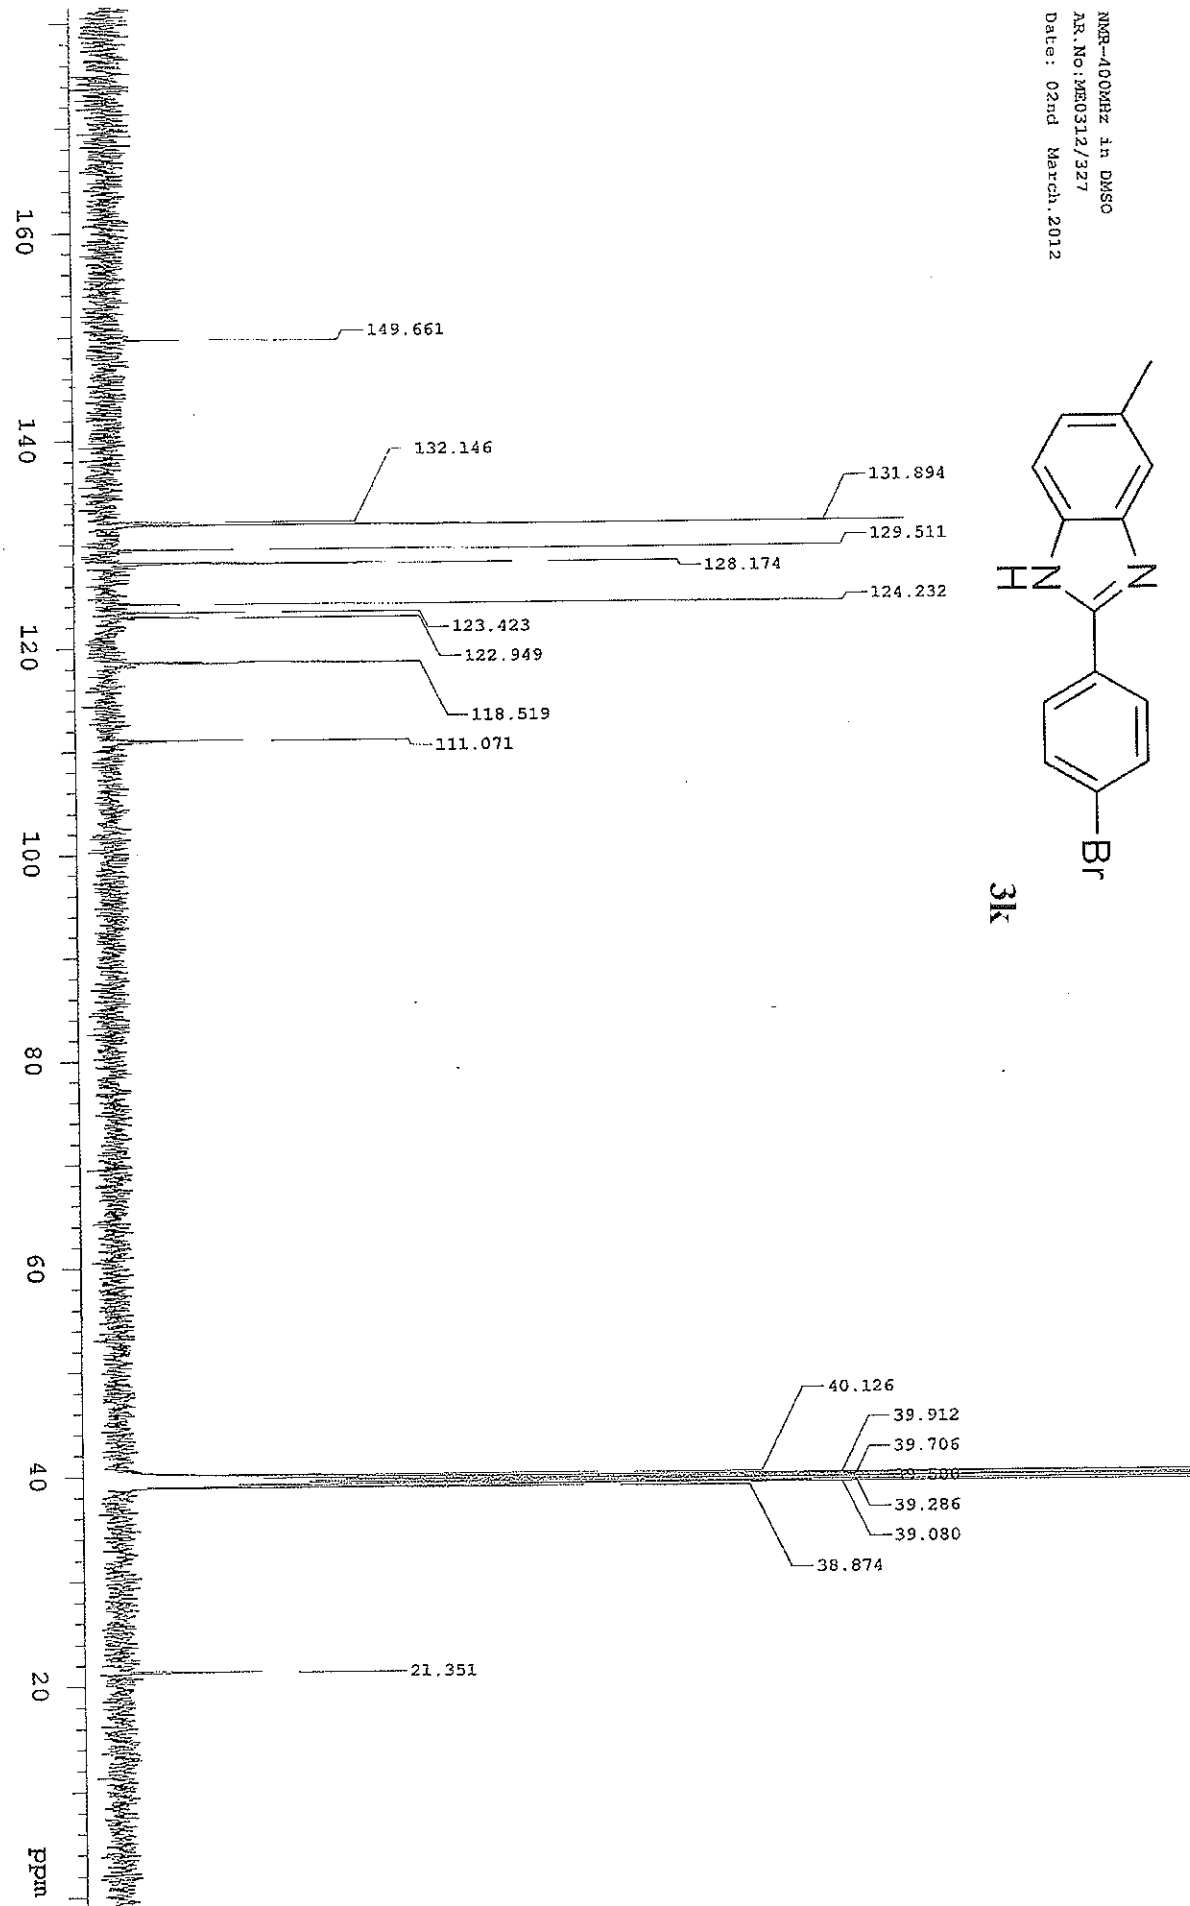

NMR-400MHz in DMSO  
AR.No:ME0312/327  
Date: 02nd March, 2012

# Elemental Composition Report

### Single Mass Analysis

Tolerance = 5.0 PPM / DBE: min = -1.0, max = 80.0

Element prediction: Off

Number of isotope peaks used for i-FiT = 3

### Monoisotopic Mass, Even Electron Ions

19 formula(e), evaluated with 1 results within limits (up to 4 best isotopic matches for each mass)

Elements Used:

C: 0-30    H: 0-35    N: 0-2    Br: 0-1

Dr.Reddy's Laboratories Ltd, ARD, TDC-1

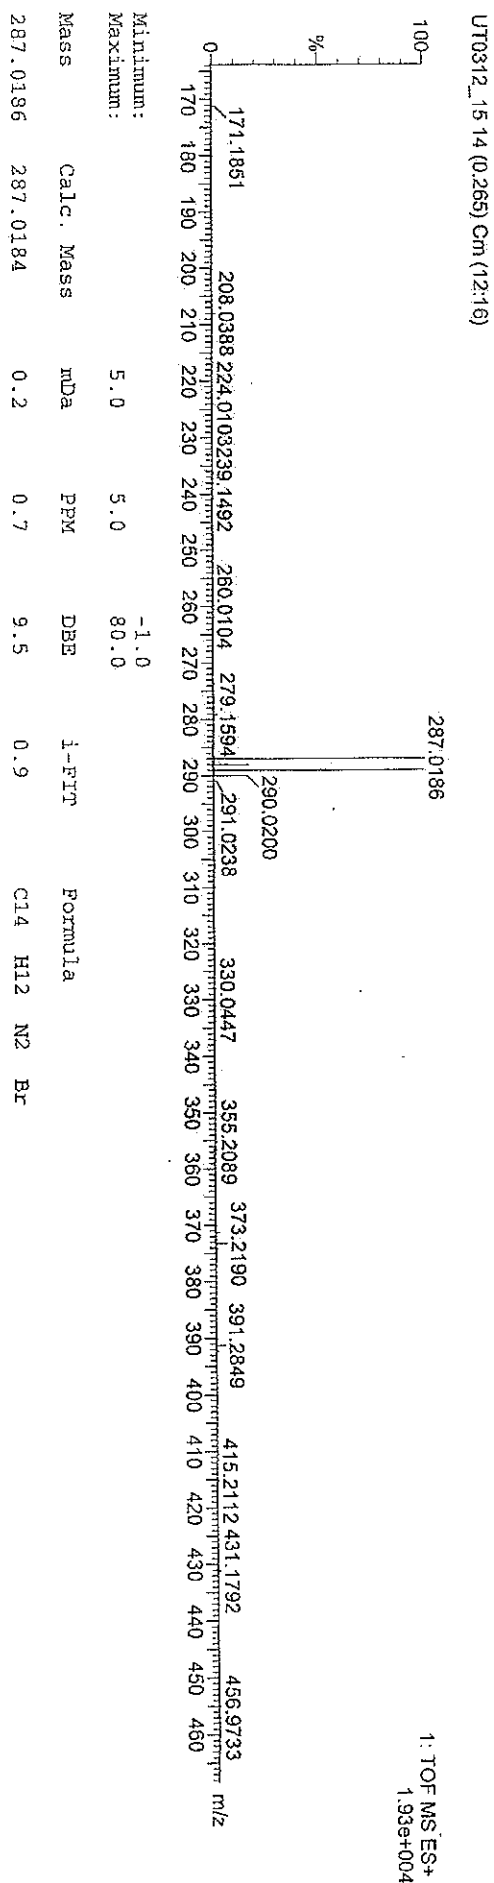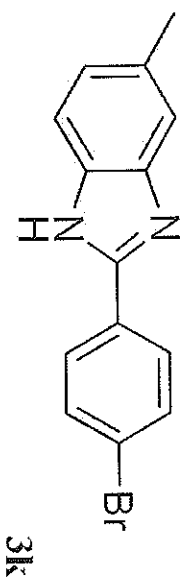

Copies of spectra

NMR-400MHz 1h DMSO  
AR.No:ME0212/1374  
Date: 14th Feb. 2012

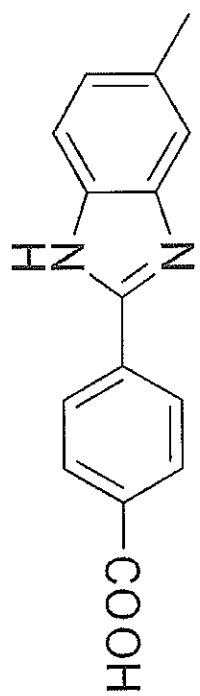

31

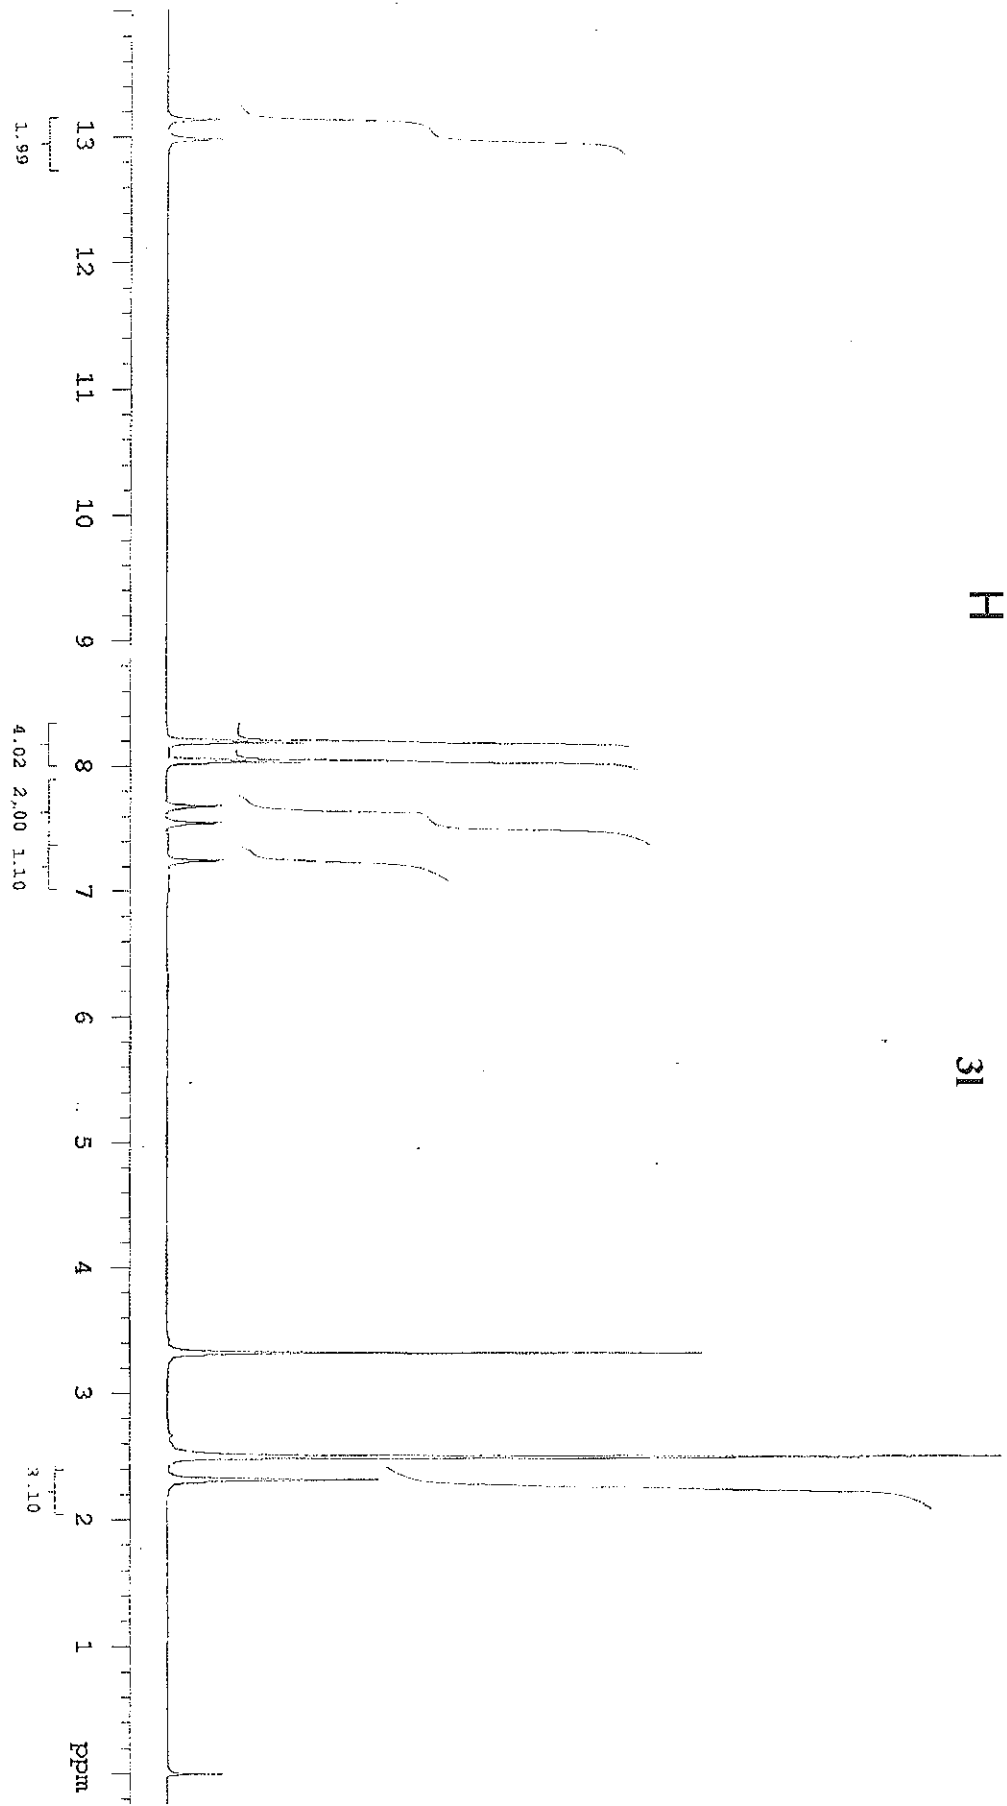

# Elemental Composition Report

### Single Mass Analysis

Tolerance = 5.0 PPM / DBE: min = -1.0, max = 80.0  
 Element prediction: Off  
 Number of isotope peaks used for i-FT = 3

### Monoisotopic Mass, Even Electron Ions

16 formula(e) evaluated with 1 results within limits (up to 4 best isotopic matches for each mass)

### Elements Used:

C: 0-20    H: 0-20    N: 0-2    O: 0-2

Dr.Reddy's Laboratories Ltd, ARD, TDC-1

UT0312\_87\_11 (0.210) Cm (11:16)

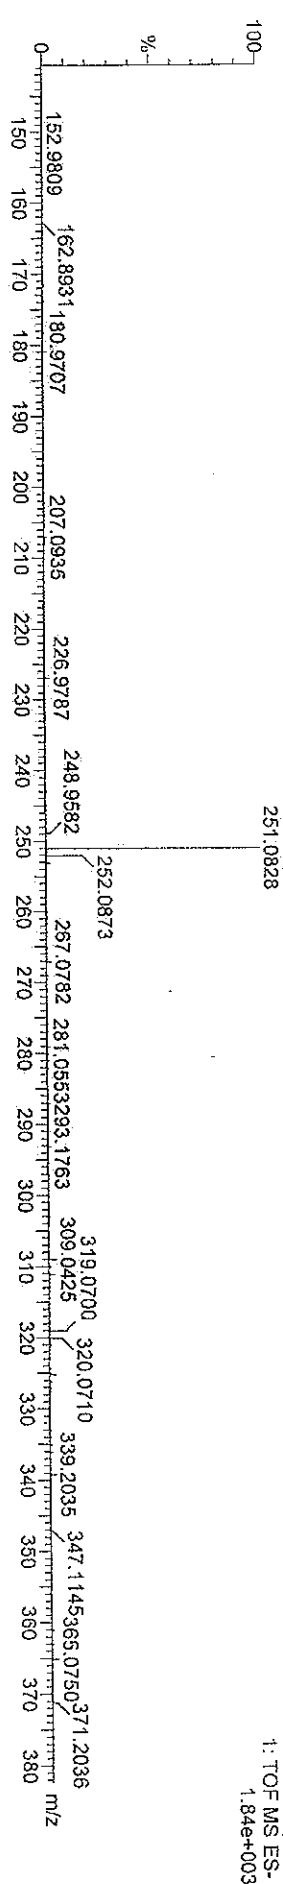

|          | Minimum: | Maximum: |     |      |     |               |         |  |  |
|----------|----------|----------|-----|------|-----|---------------|---------|--|--|
|          |          |          |     |      |     |               |         |  |  |
| Mass     | Calc.    | Mass     | mDa | PPM  | DBE | i-FIT         | Formula |  |  |
| 251.0828 | 251.0821 | 0.7      | 2.8 | 11.5 | 0.8 | C15 H11 N2 O2 |         |  |  |

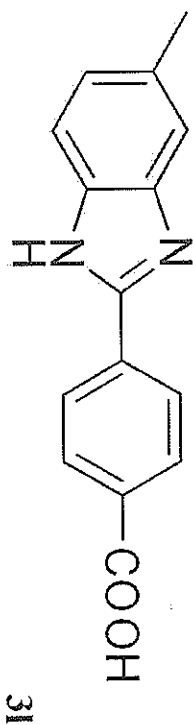

Copies of spectra

NMR-400 in DMSO  
AK.No:ME1010/936  
Date:12th Oct.2010

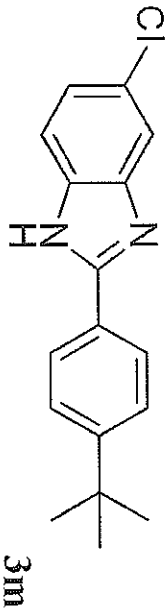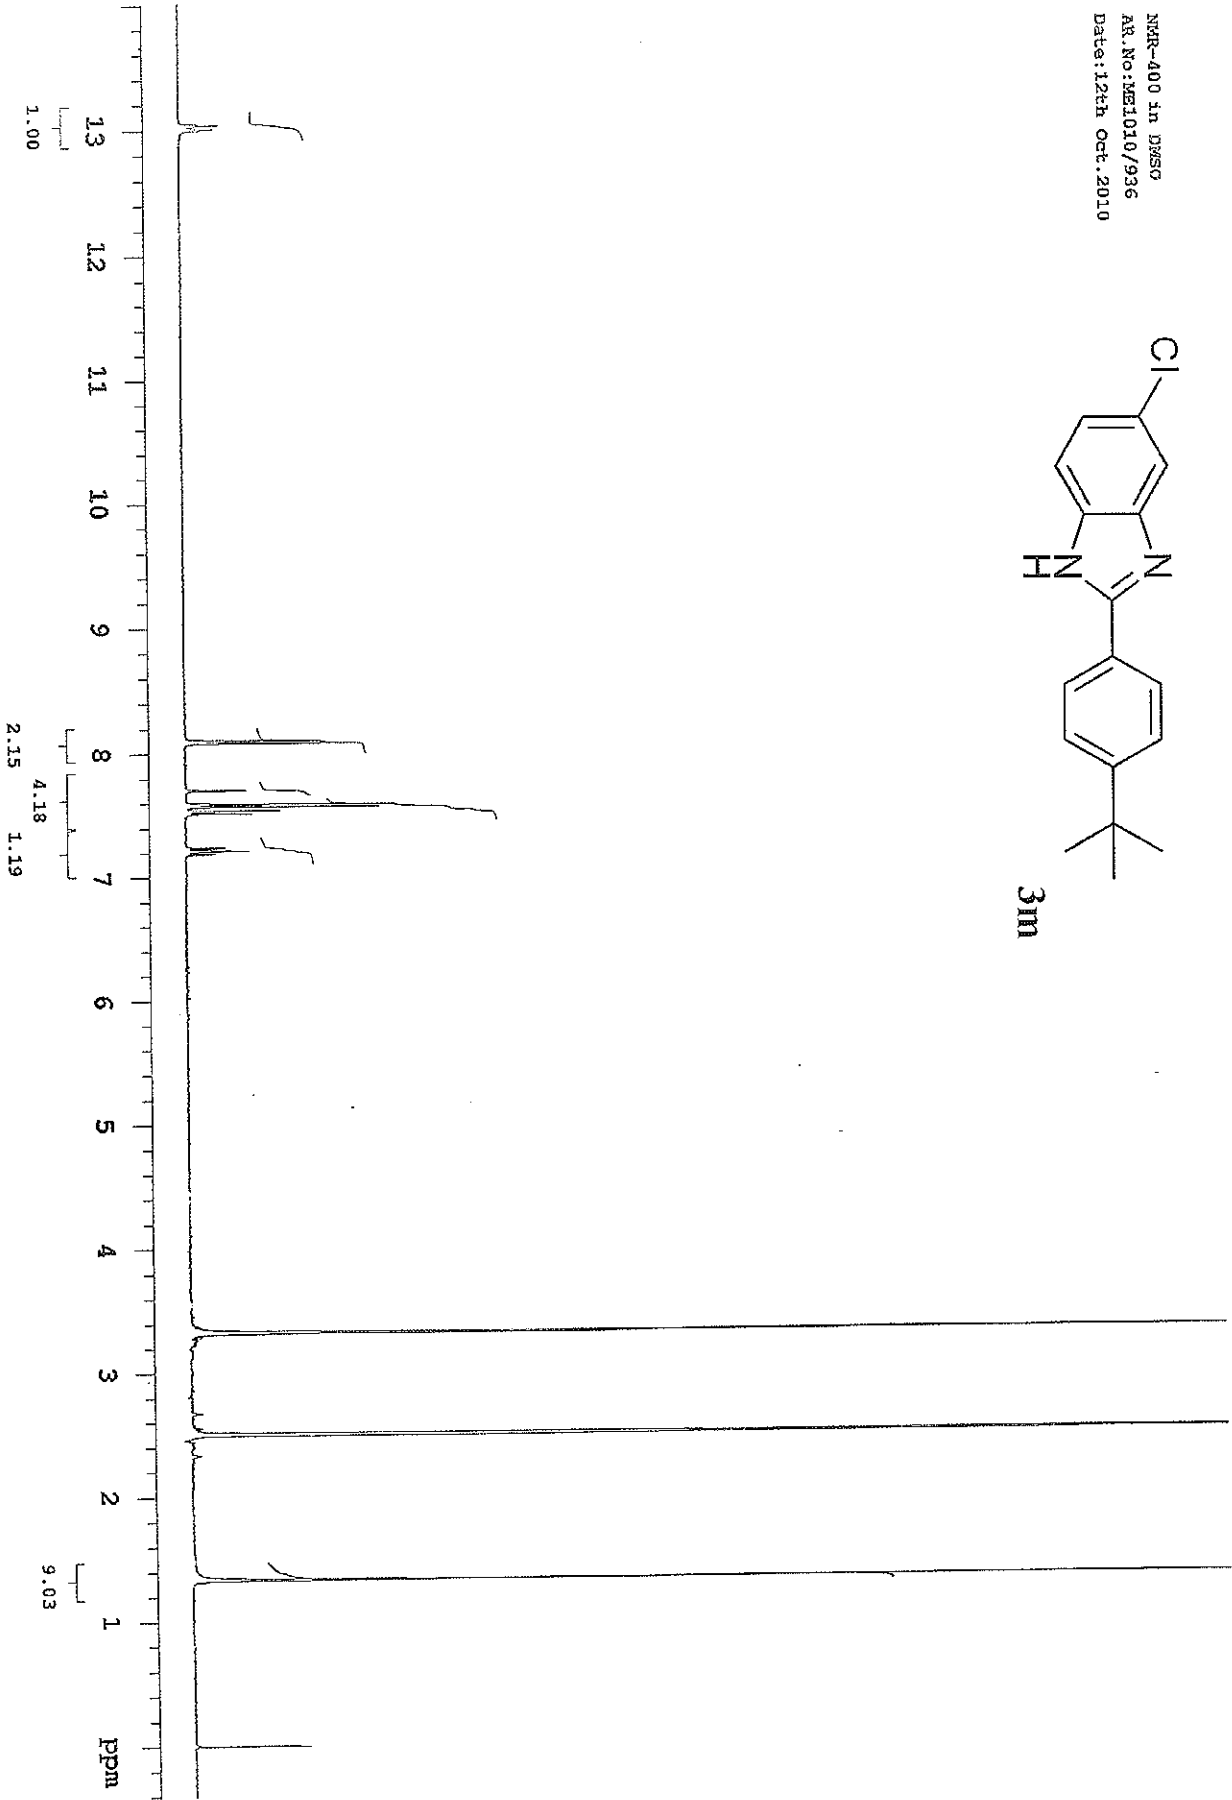

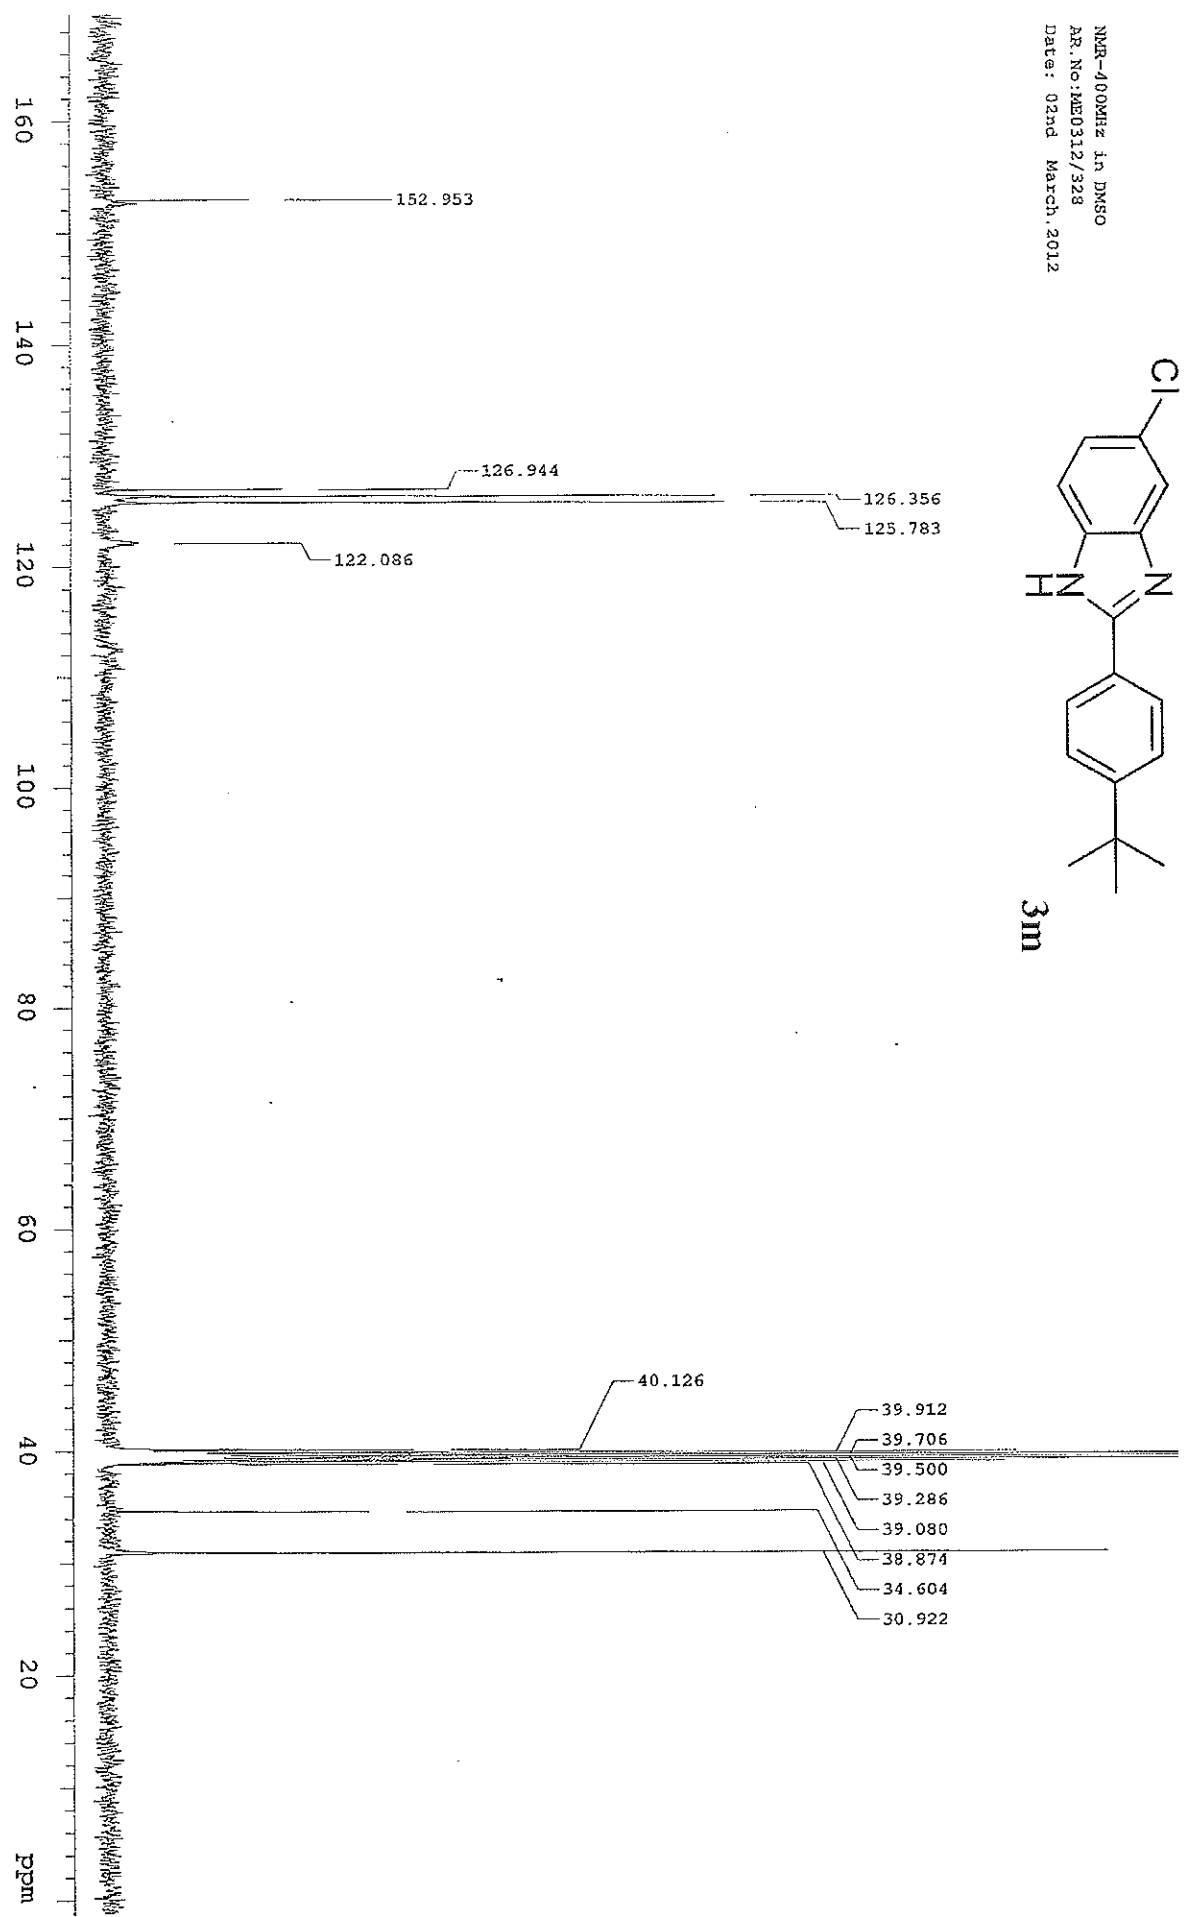

NMR-400MHz in DMSO  
AR.No:ME0312/328  
Date: 02nd March, 2012

## Elemental Composition Report

### Single Mass Analysis

Tolerance = 5.0 PPM / DBE: min = -1.0, max = 80.0

Element prediction: Off

Number of isotope peaks used for i-FIT = 3

### Monoisotopic Mass, Even Electron Ions

6 formula(e) evaluated with 1 results within limits (up to 4 best isotopic matches for each mass)

Elements Used:

C: 0-20 H: 0-20 N: 0-2 Cl: 0-1

Dr. Reddy's Laboratories Ltd, ARD, TDC-1

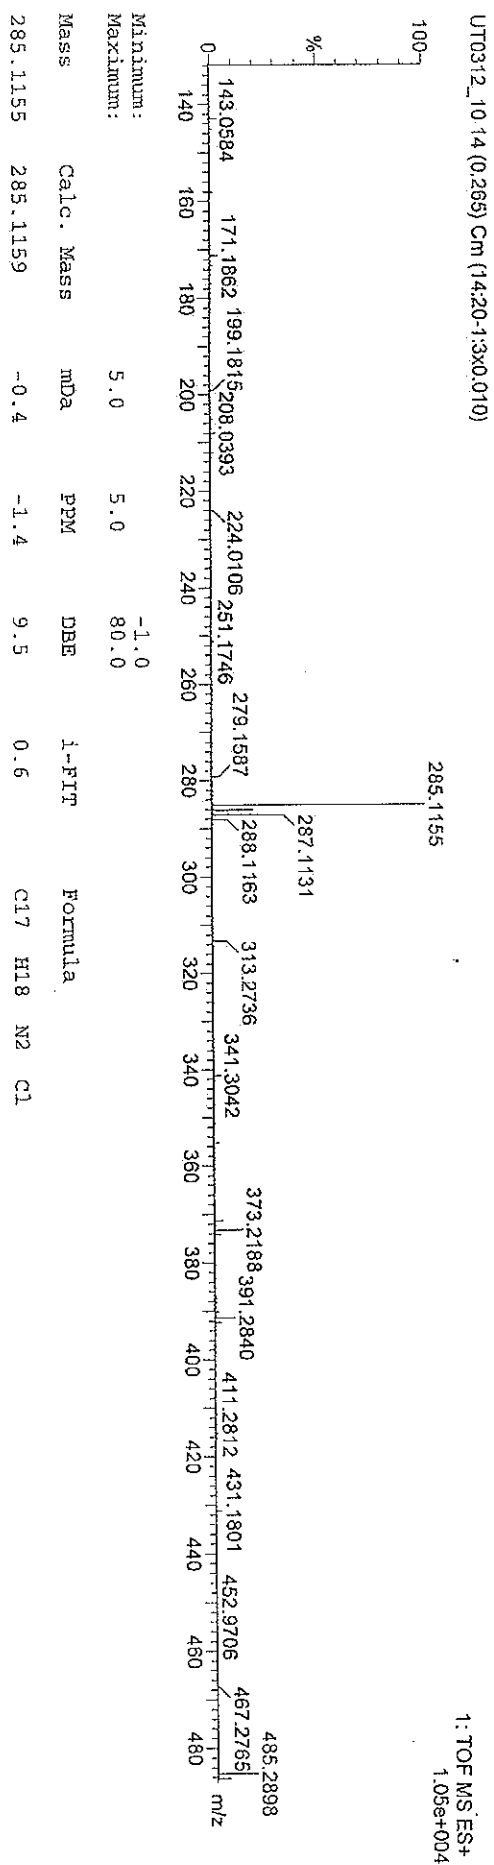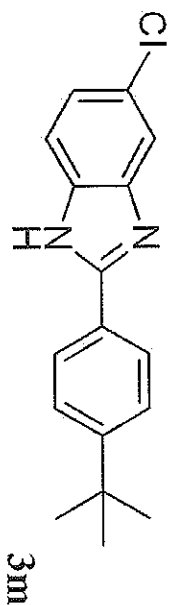



Copies of spectra

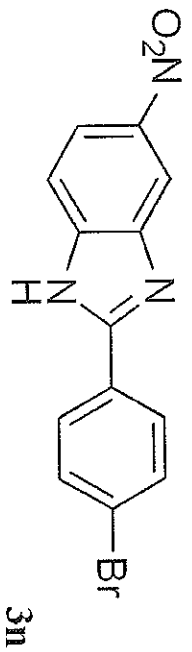

NMR-400MHz in DMSO  
AR.No:ME0212/1135  
Date: 13th Feb. 2012

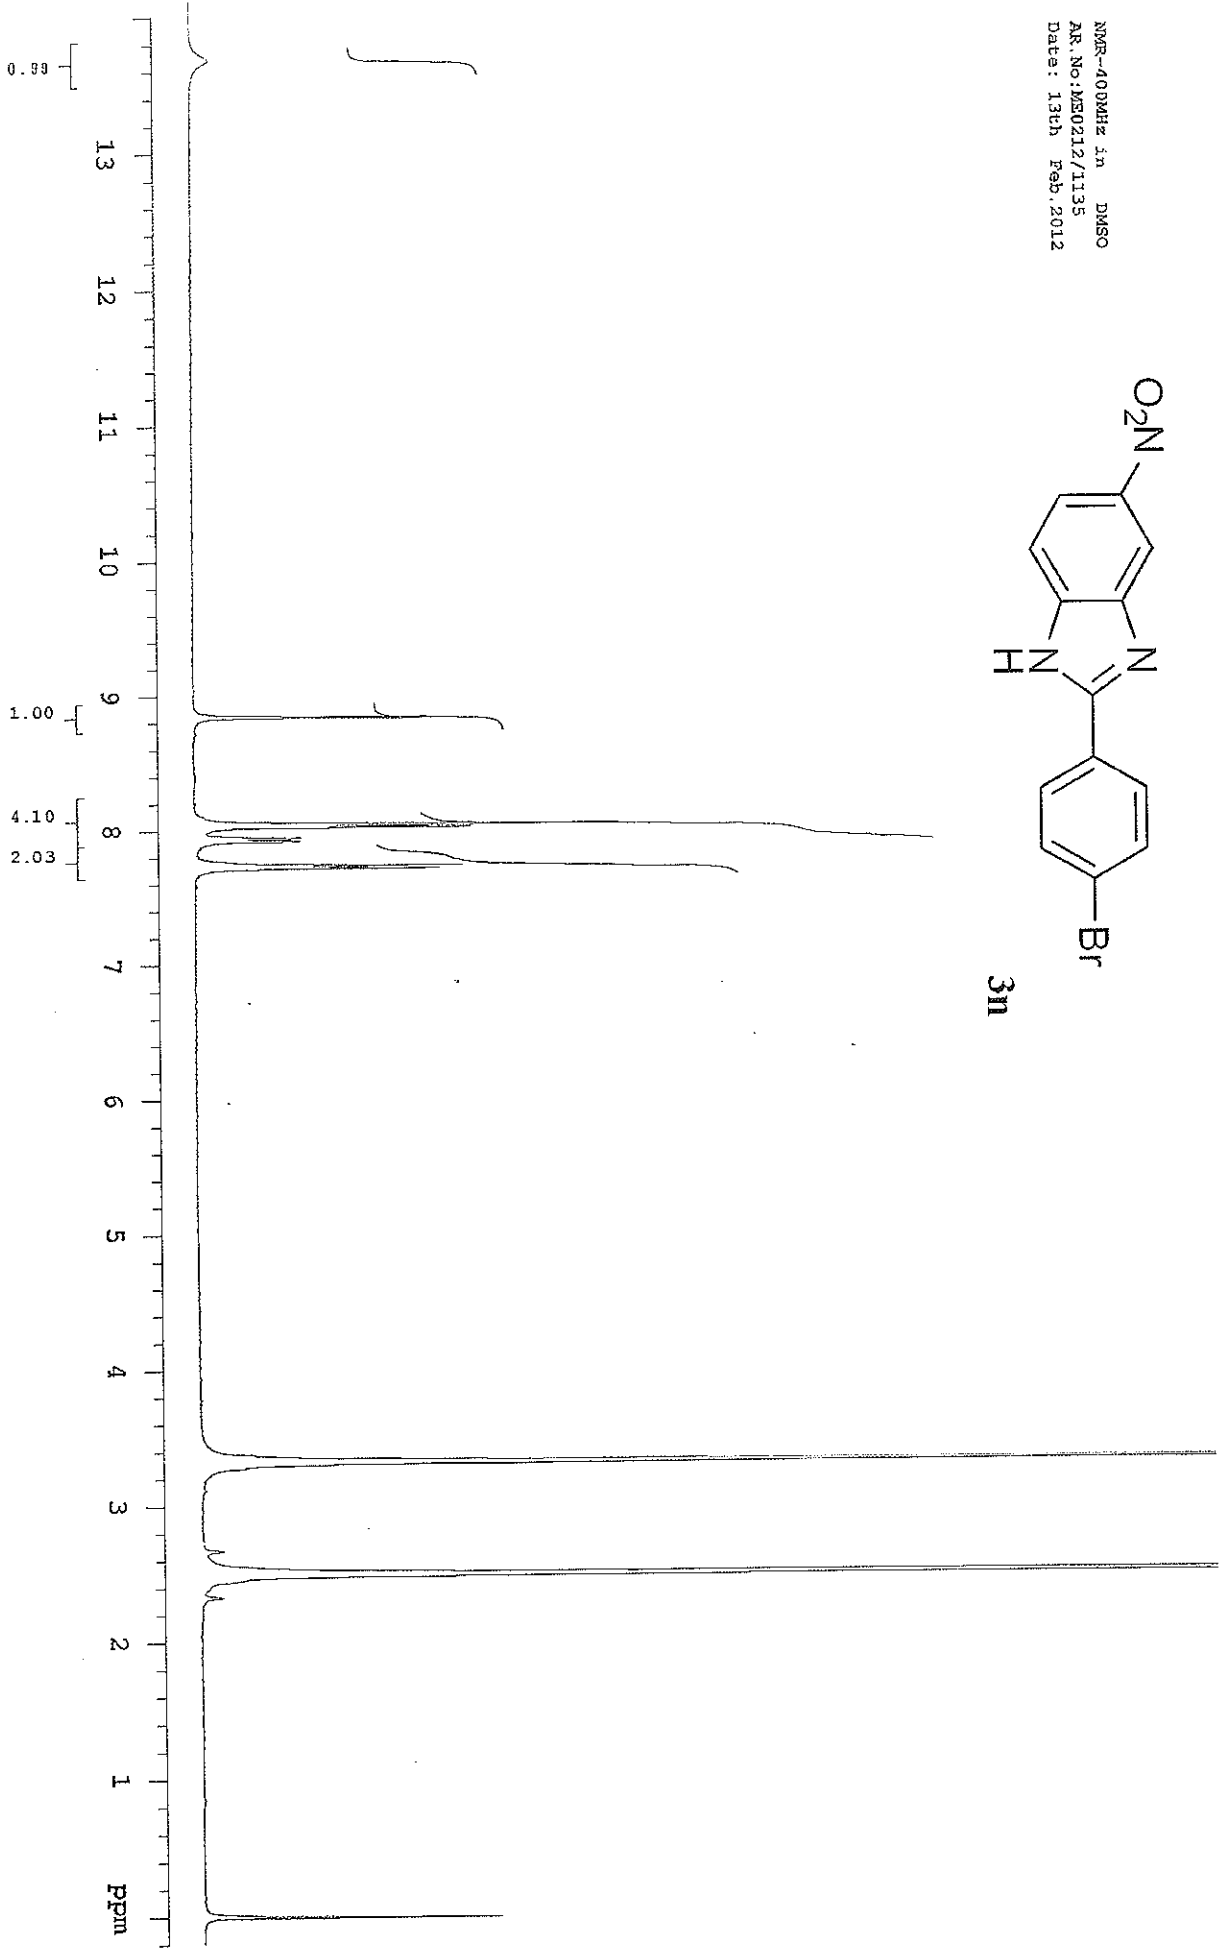

Copies of spectra

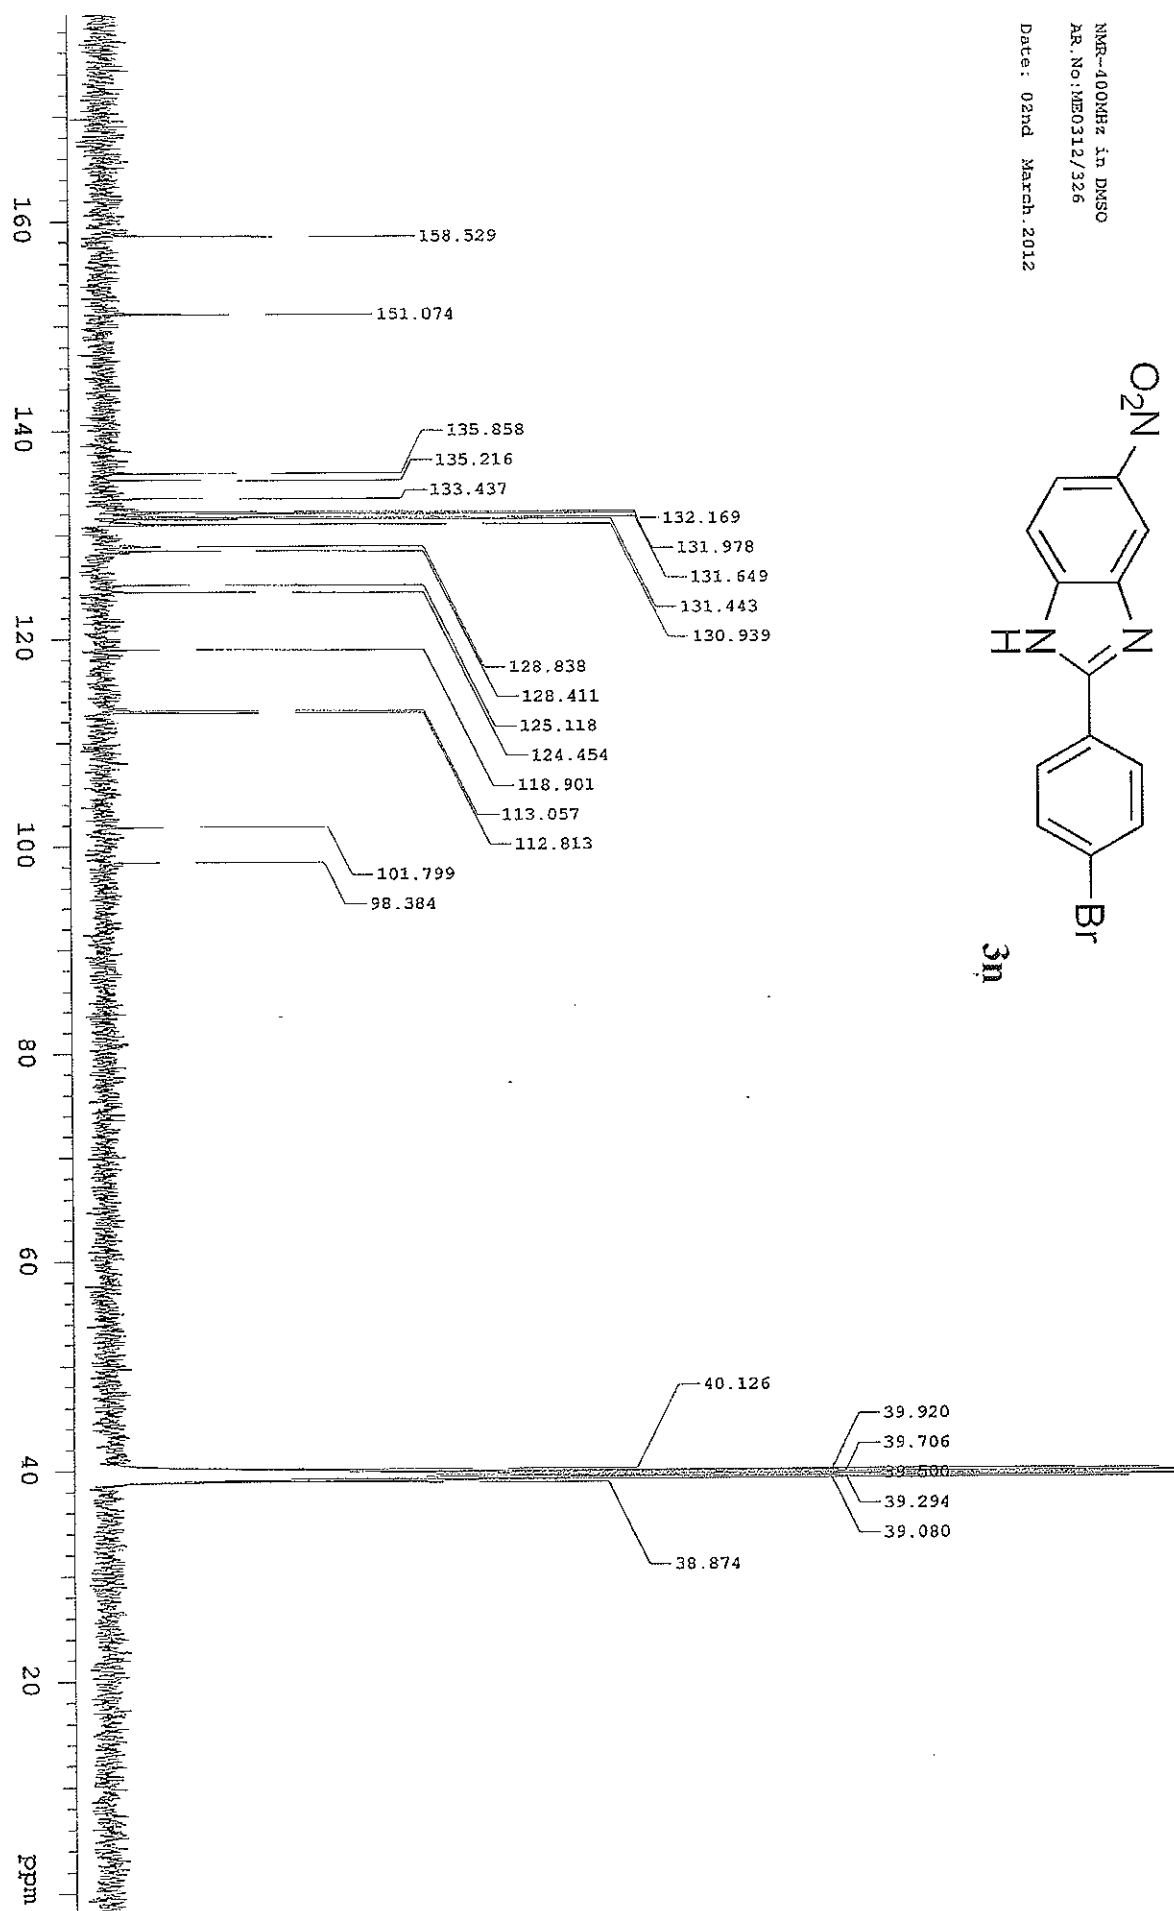

NMR-400MHz in DMSO  
AR. No: ME0312/326  
Date: 02nd March. 2012

# Elemental Composition Report

## Single Mass Analysis

Tolerance = 5.0 PPM / DBE: min = -1.0, max = 80.0

Element prediction: Off

Number of isotope peaks used for i-FIT = 3

Monoisotopic Mass, Even Electron Ions

18 formula(e) evaluated with 1 results within limits (up to 4 best isotopic matches for each mass)

Elements Used:

C: 0-15 H: 0-10 N: 0-3 O: 0-2 Br: 0-1

Dr. Reddy's Laboratories Ltd, ARD, TDC-1

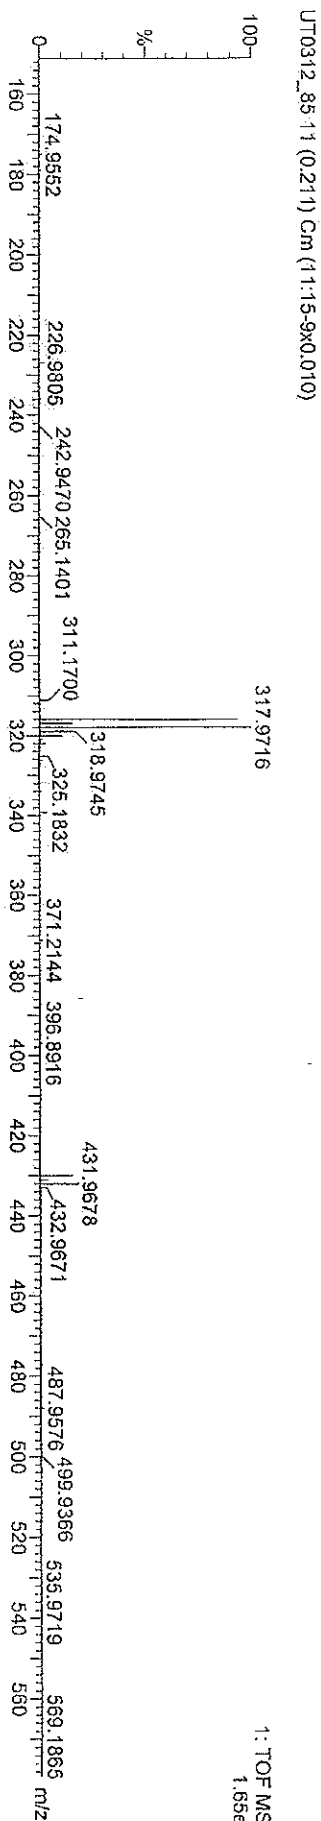

Copies of spectra

| Minimum: |            | 5.0 | 5.0 | -1.0 |       |                 |
|----------|------------|-----|-----|------|-------|-----------------|
| Maximum: |            |     |     | 80.0 |       |                 |
| Mass     | Calc. Mass | mDa | PPM | DBE  | i-FIT | Formula         |
| 315.9729 | 315.9722   | 0.7 | 2.2 | 11.5 | 2.8   | C13 H7 N3 O2 Br |

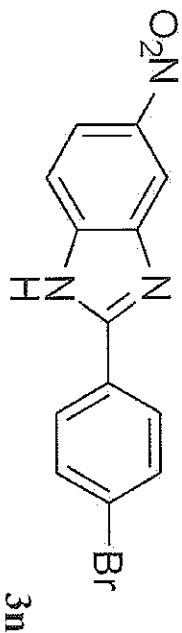

Copies of spectra

NMR-400 in DMSO  
R.R.No:ME1010/263  
Date: 04 th Oct 2010

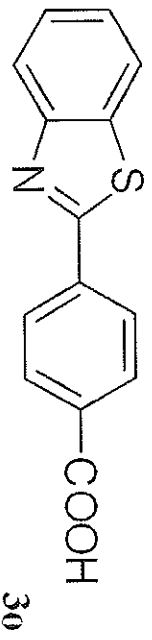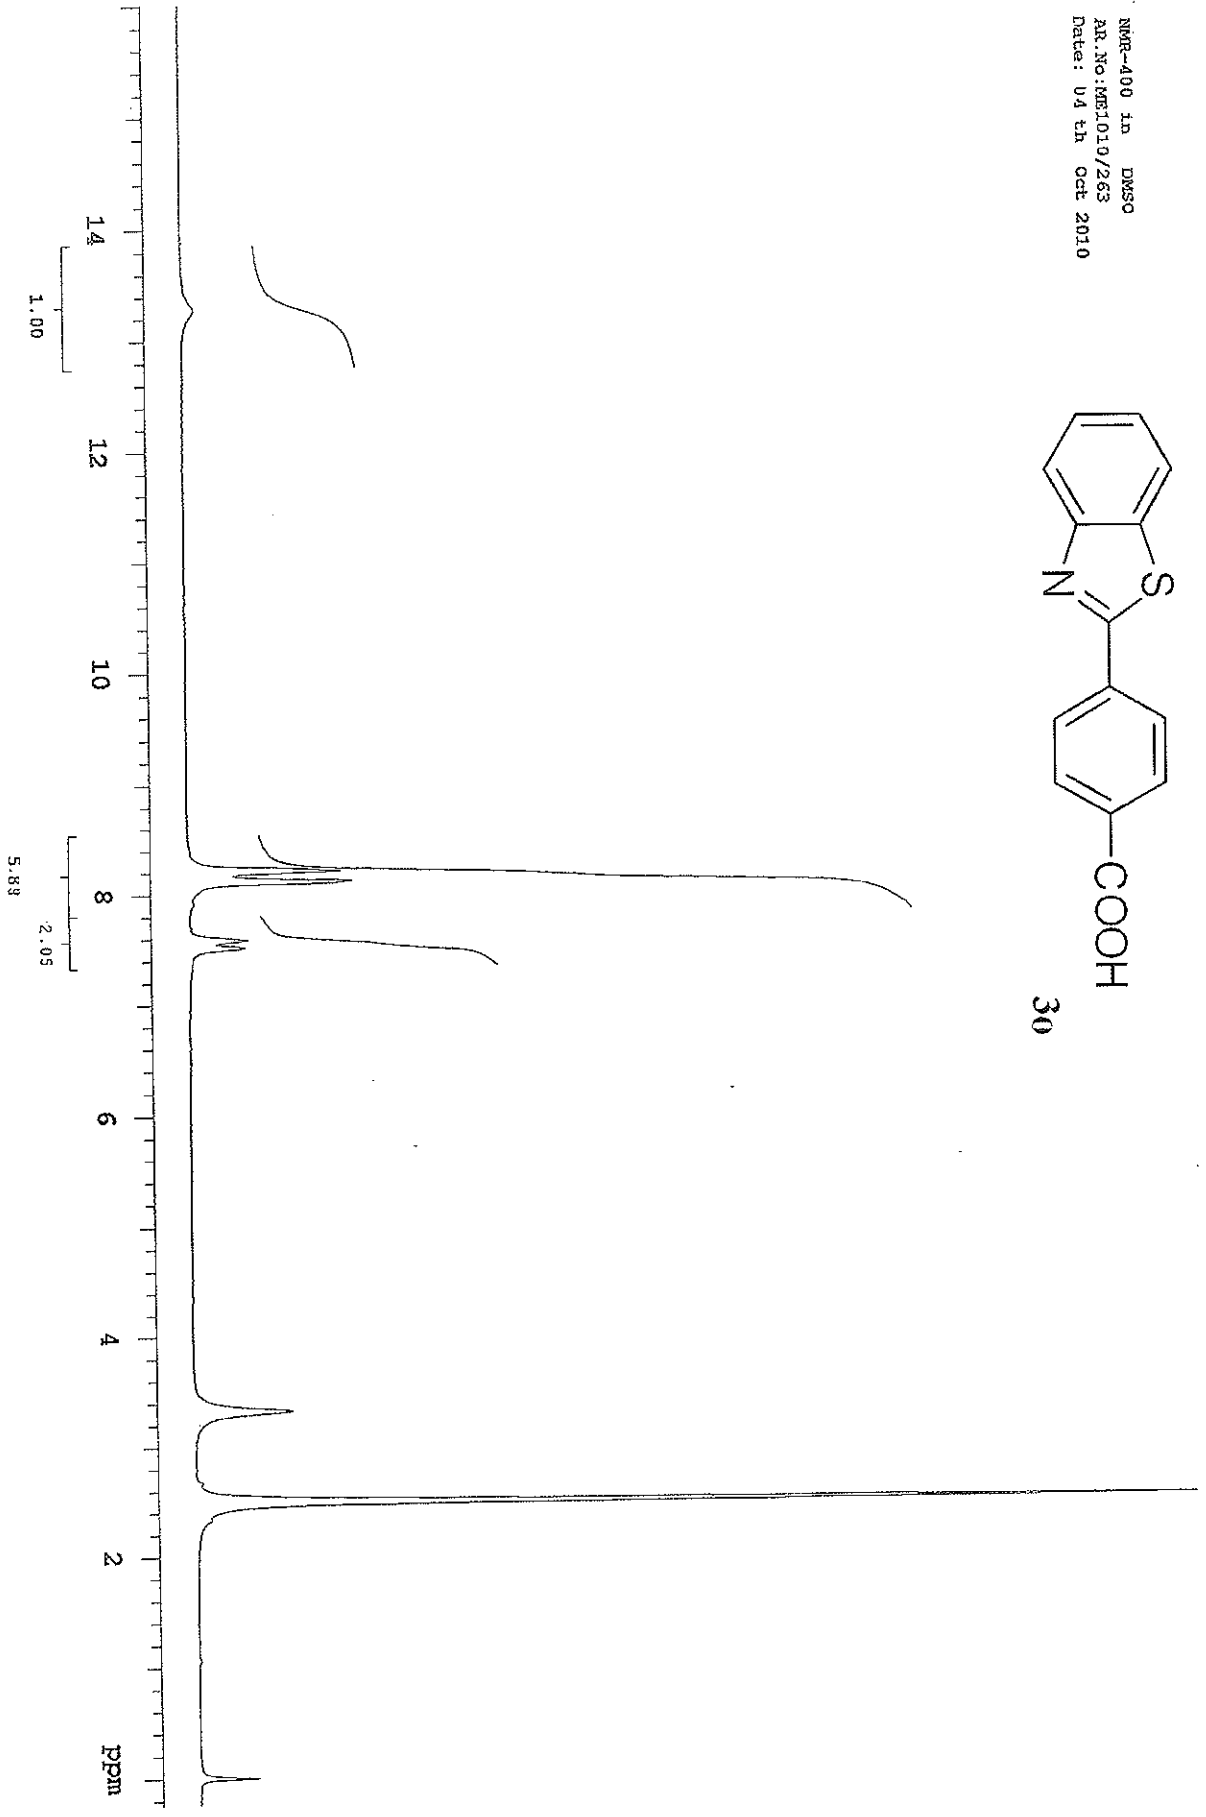

NR-400 in DMSO  
AR.No:ME110/1011  
Date: 15 th Nov 2010

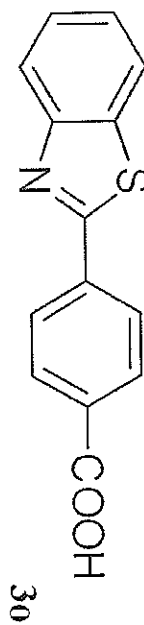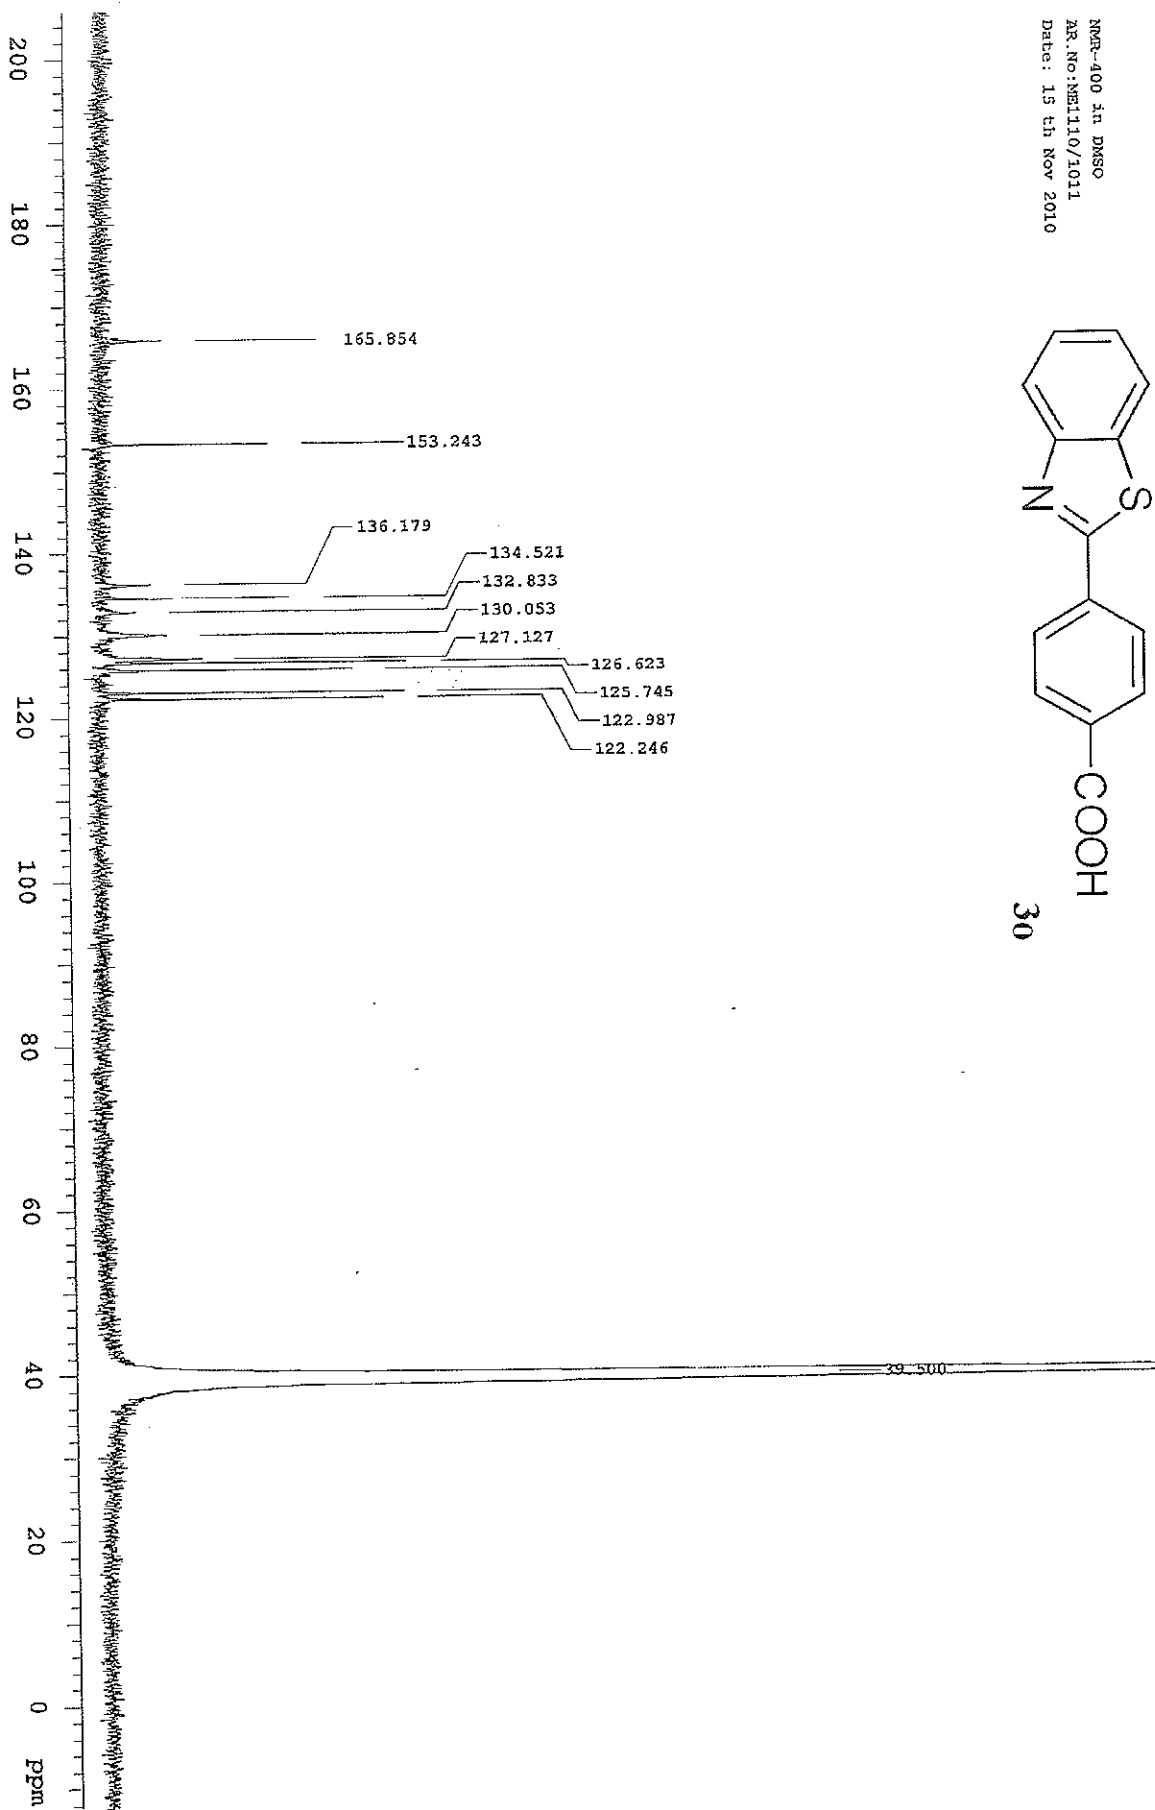

# Elemental Composition Report

## Single Mass Analysis

Tolerance = 5.0 PPM / DBE: min = -1.0, max = 80.0

Element prediction: Off

Number of isotope peaks used for i-FIT = 3

Monoisotopic Mass, Even Electron Ions

33 formula(e) evaluated with 1 results within limits (up to 4 best isotopic matches for each mass)

Elements Used:

C: 0-20 H: 0-20 N: 0-2 O: 0-2 S: 0-1

Dr.Reddy's Laboratories Ltd, ARD, IDC-1

UT0312\_24 14 (0.264) Cm (13:18)

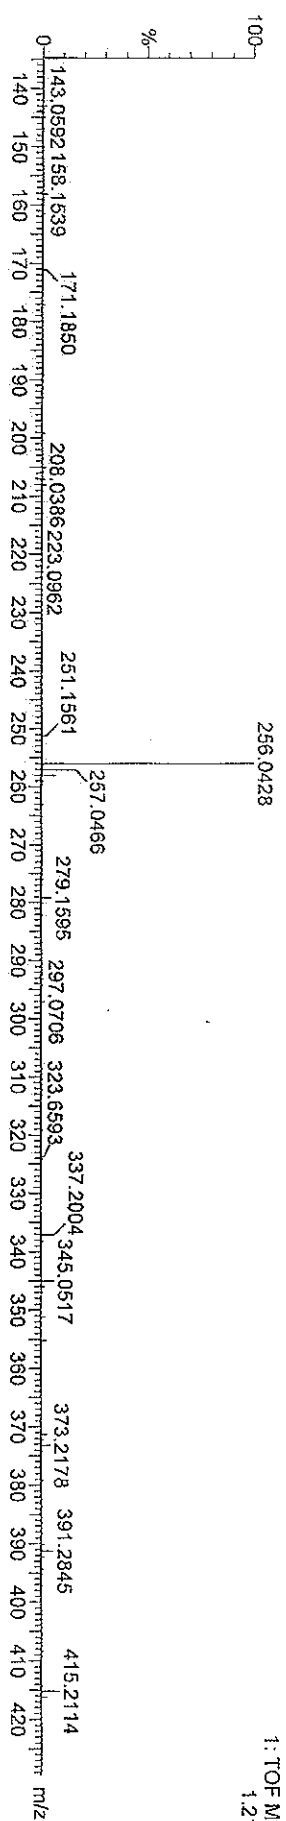

1: TOF MS ES+  
1.21e+004

Copies of spectra

|          |            |      |      |      |       |                |
|----------|------------|------|------|------|-------|----------------|
| Minimum: |            |      |      |      |       |                |
| Maximum: |            |      |      |      |       |                |
| Mass     | Calc. Mass | mDa  | PPM  | DBE  | i-FIT | Formula        |
| 256.0428 | 256.0432   | -0.4 | -1.6 | 10.5 | 5.5   | C14 H10 N O2 S |

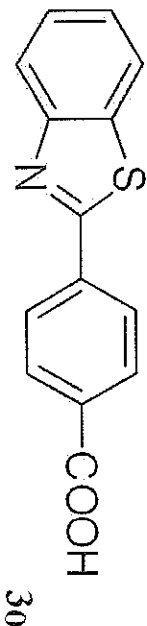

Copies of spectra

NMR-400MHz in DMSO  
AR.No:ME0212/1375  
Date: 14th Feb. 2012

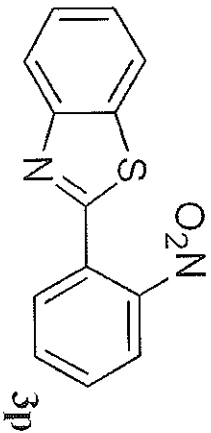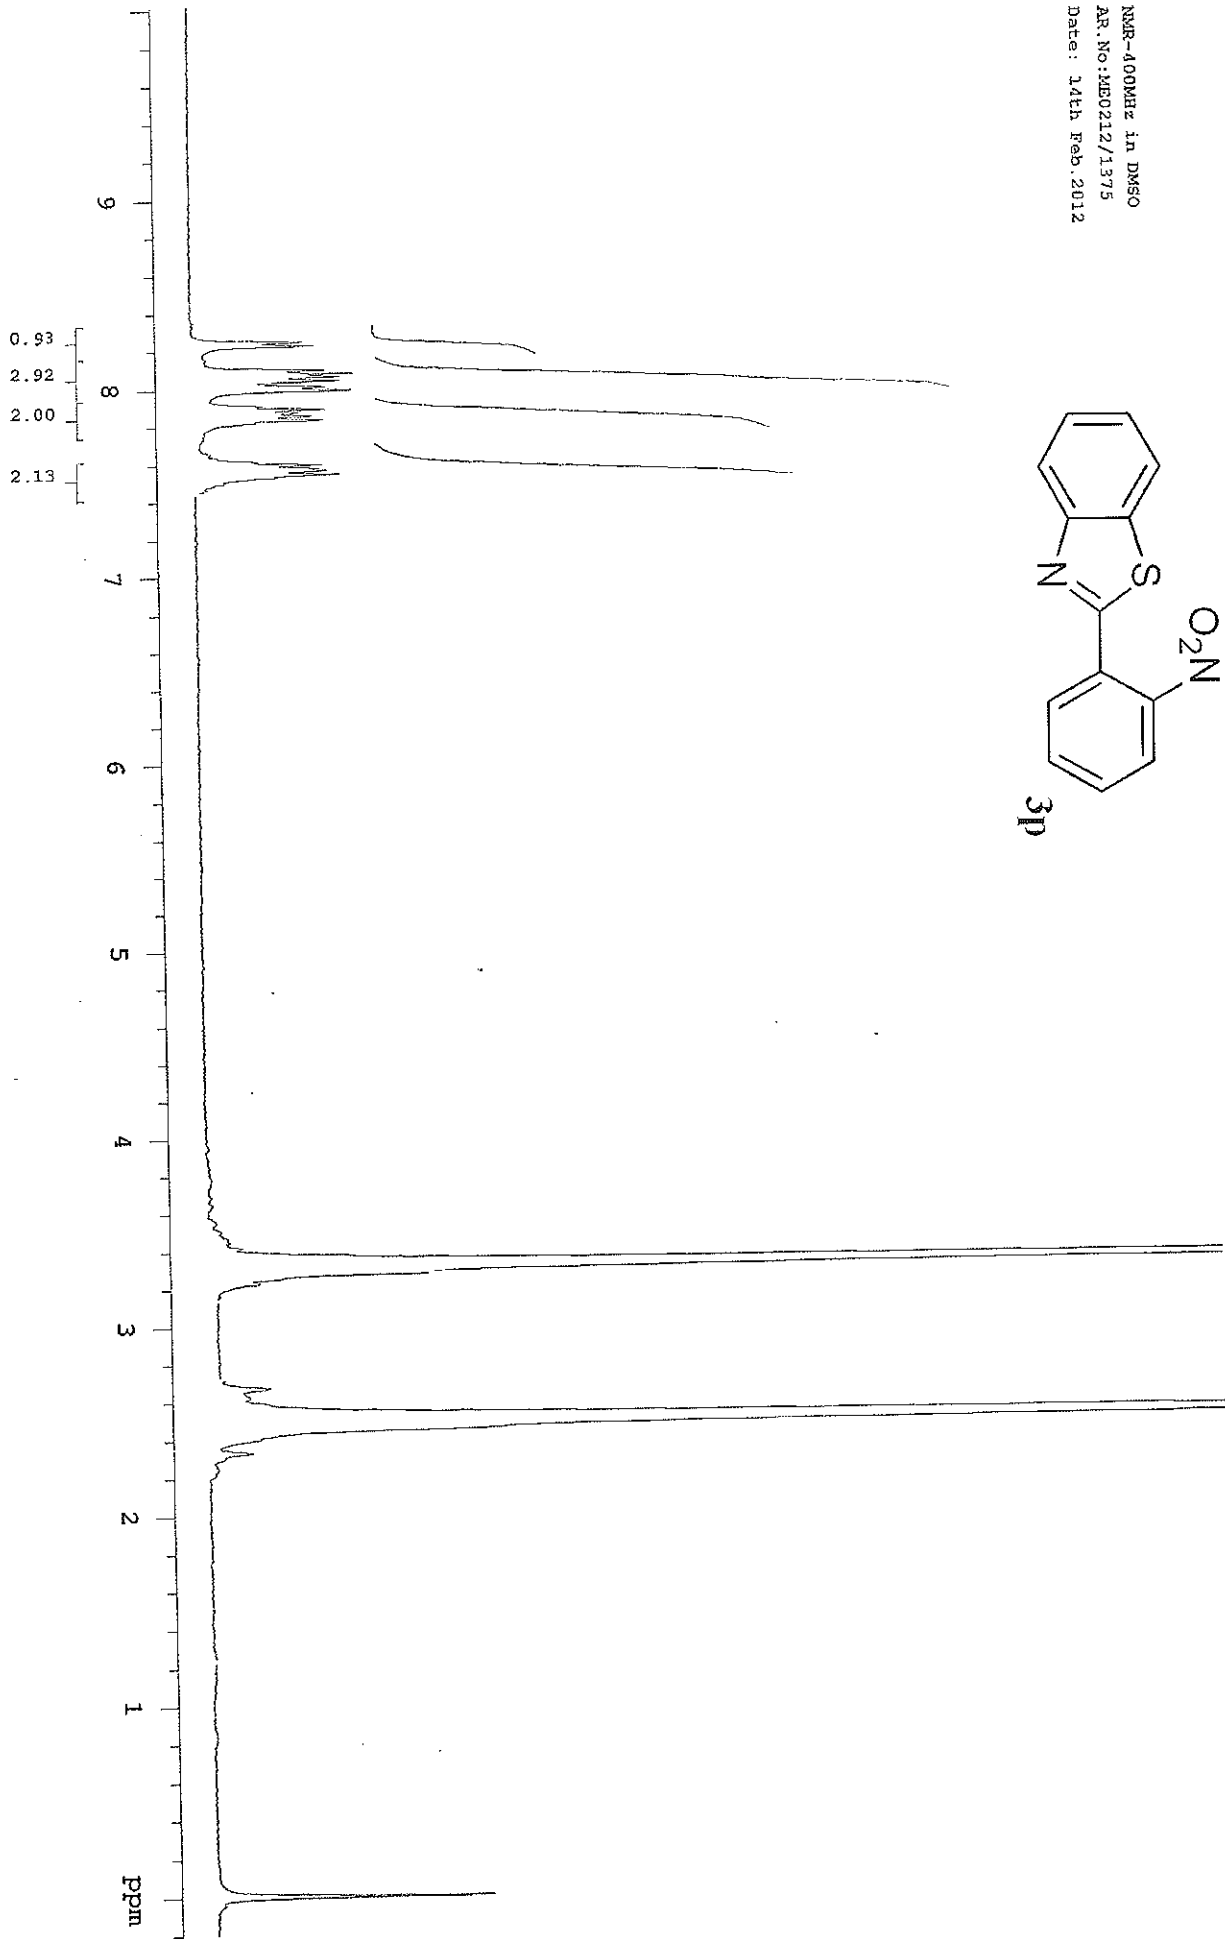

nmr-400MHz in DMSO  
Ac.No:ME0312/777  
Date: 07th March, 2012

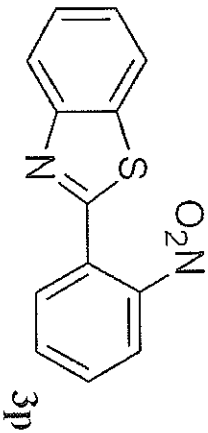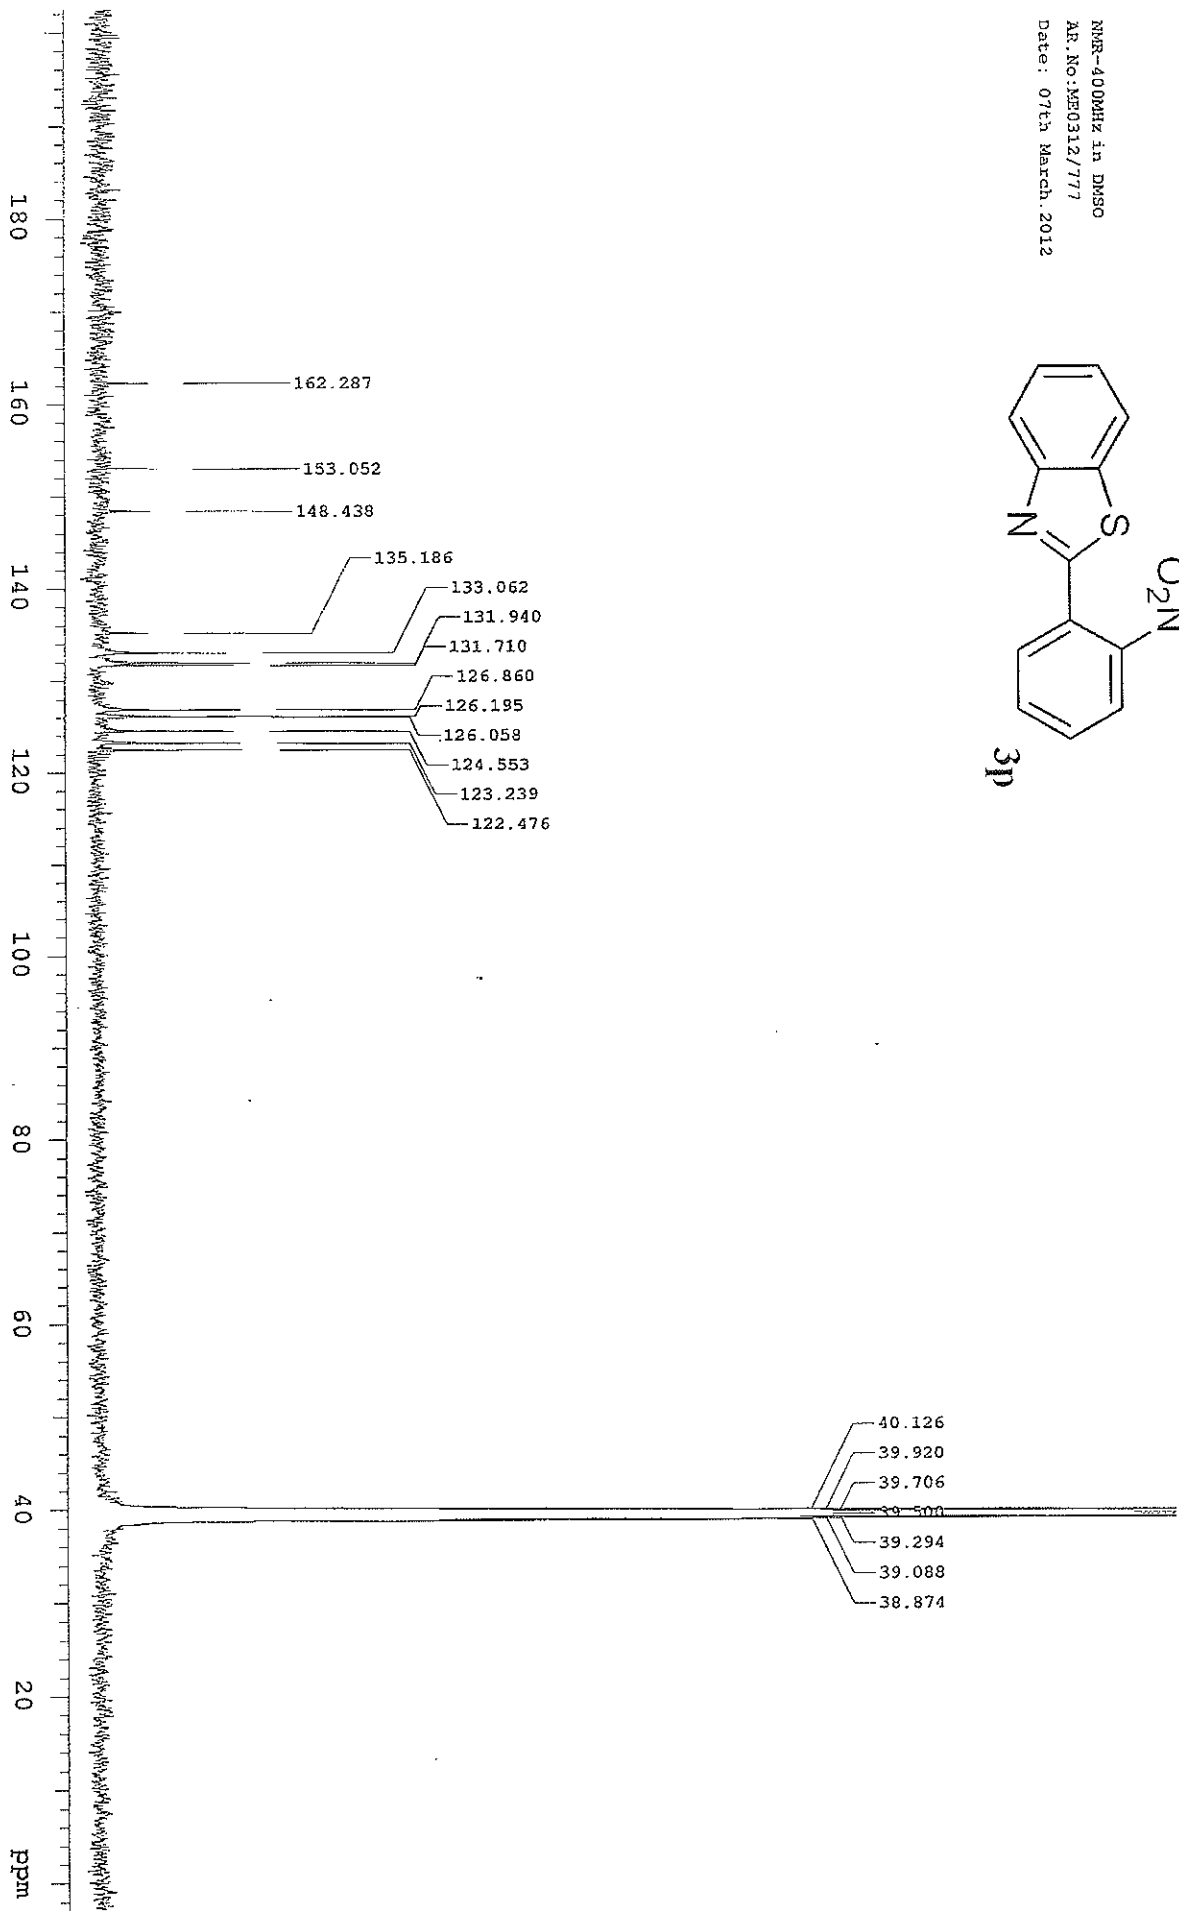



# Elemental Composition Report

## Single Mass Analysis

Tolerance = 5.0 PPM / DBE: min = -1.0, max = 80.0

Element prediction: Off

Number of isotope peaks used for i-FIT = 3

Monoisotopic Mass, Even Electron Ions

25 formula(e) evaluated with 1 results within limits (up to 4 best isotopic matches for each mass)

Elements Used:

C: 0-15 H: 0-20 N: 0-3 O: 0-2 S: 0-1

UT0312\_08 15 (0.279) Cm (9:17-1x0.010)

Dr. Reddy's Laboratories Ltd, ARD, TDC-1

Copies of spectra

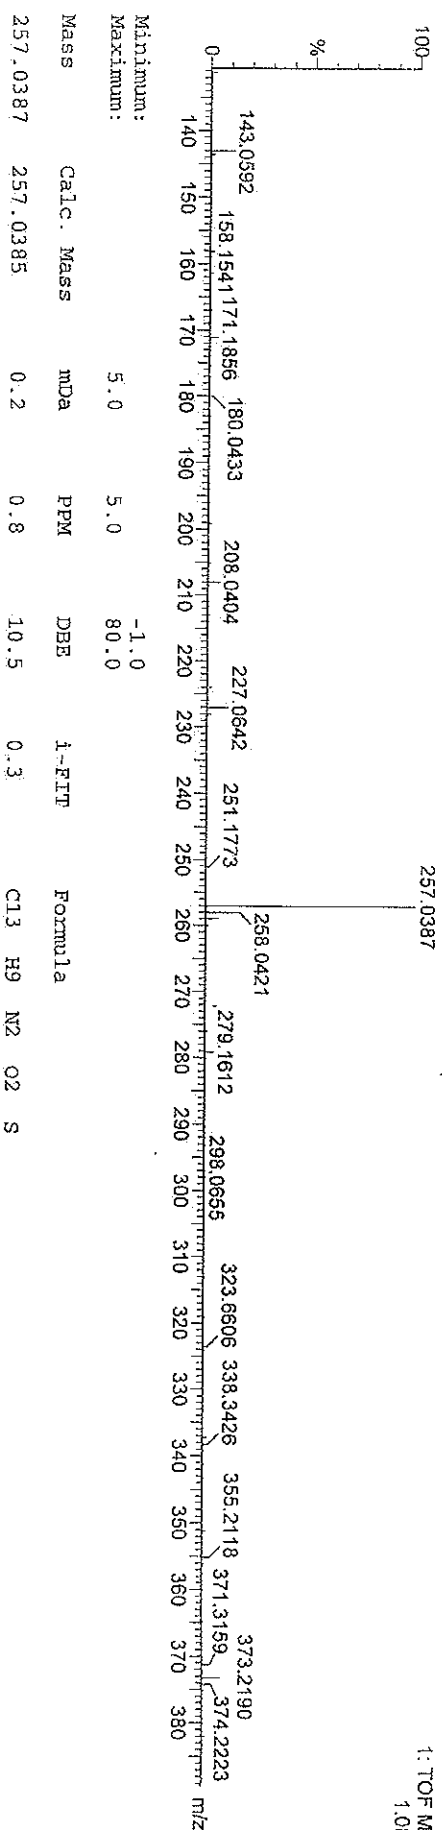

1: TOF MS ES+  
1.08e+004

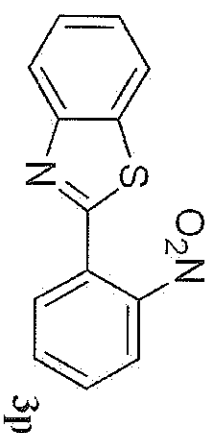

Copies of spectra

NMR-400 in DMSO  
AR.No:ME1010/326  
Date: 05 th Oct 2010

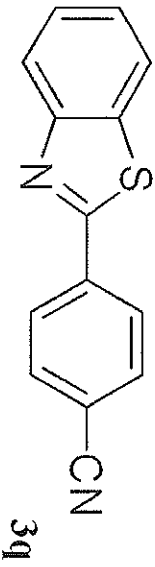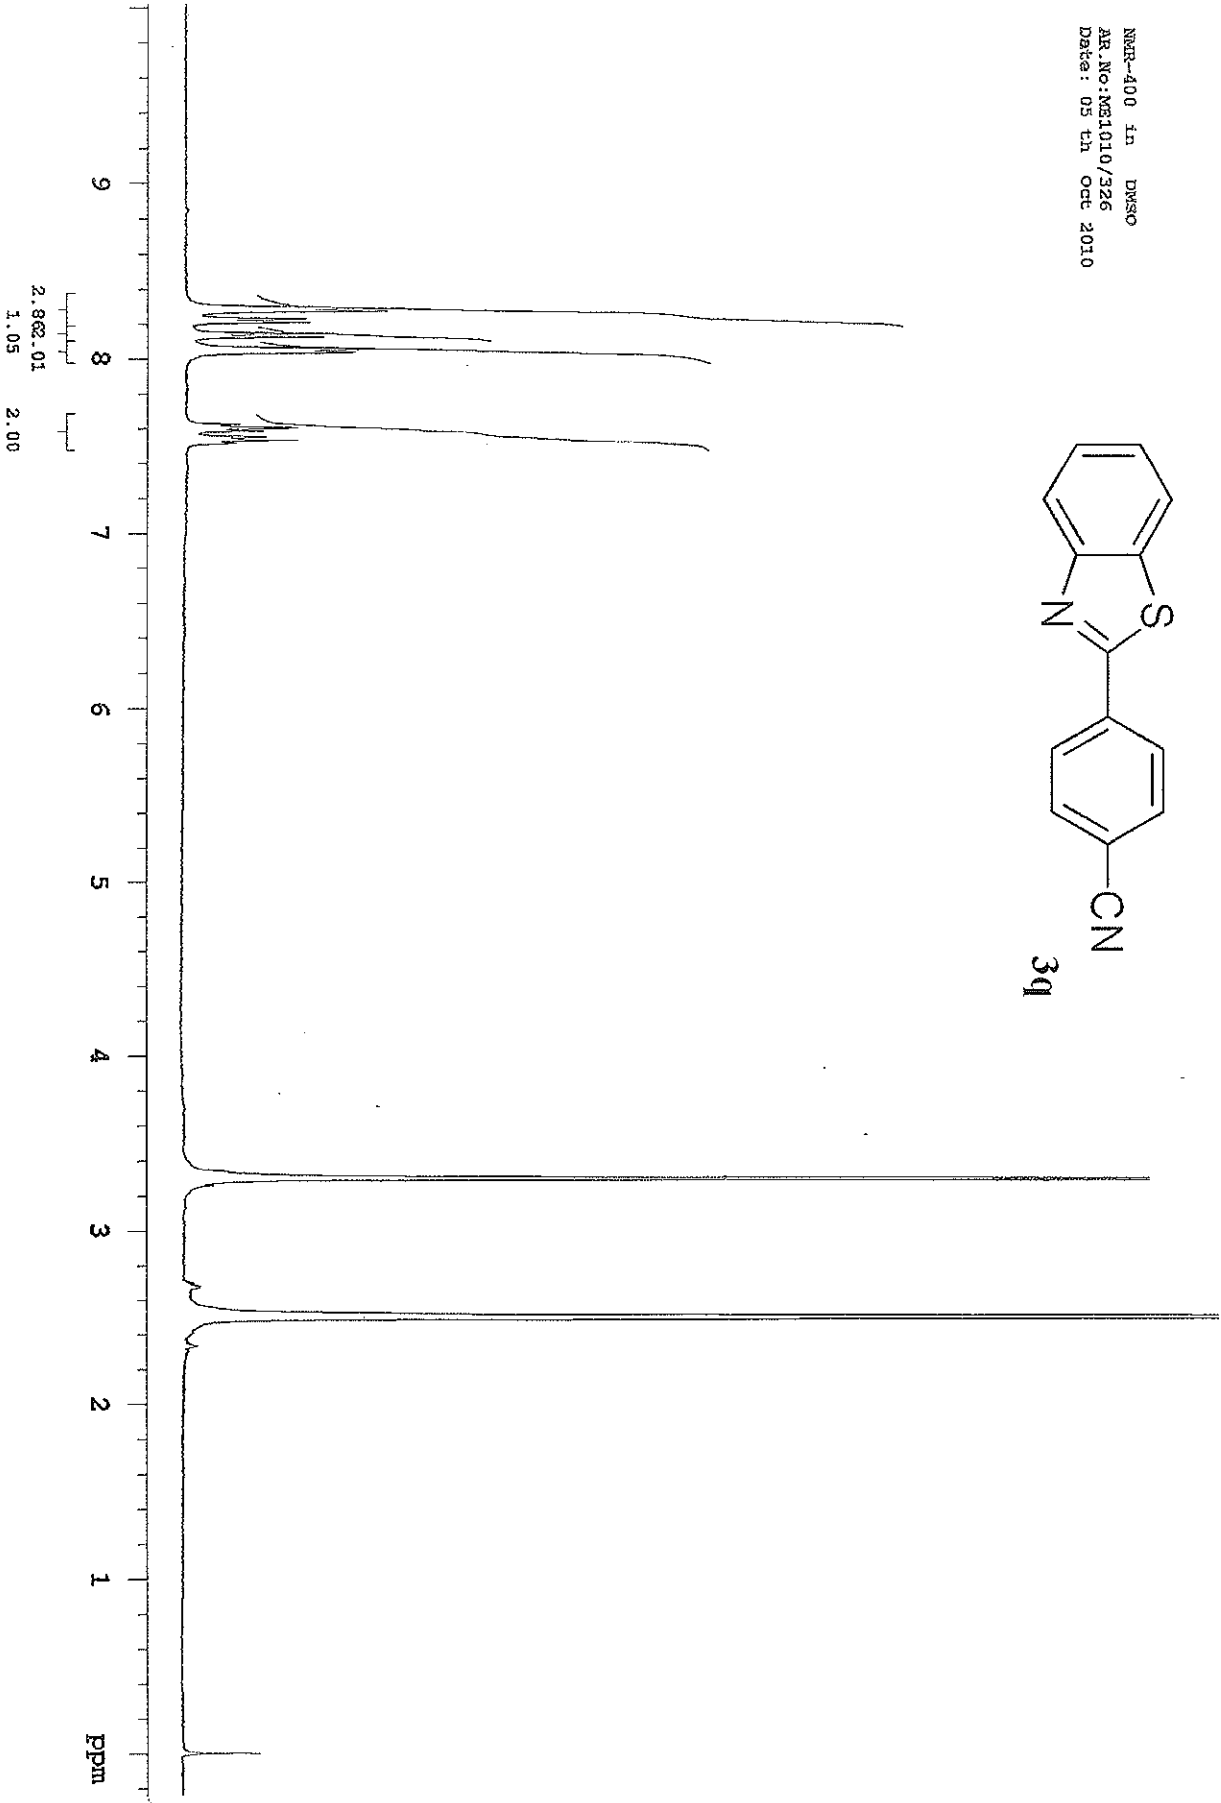

NMR-400 in DMSO  
AR NO: GE1210/24  
Date: 13 th Dec. 2010

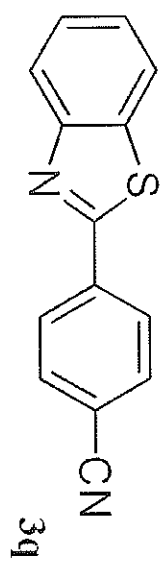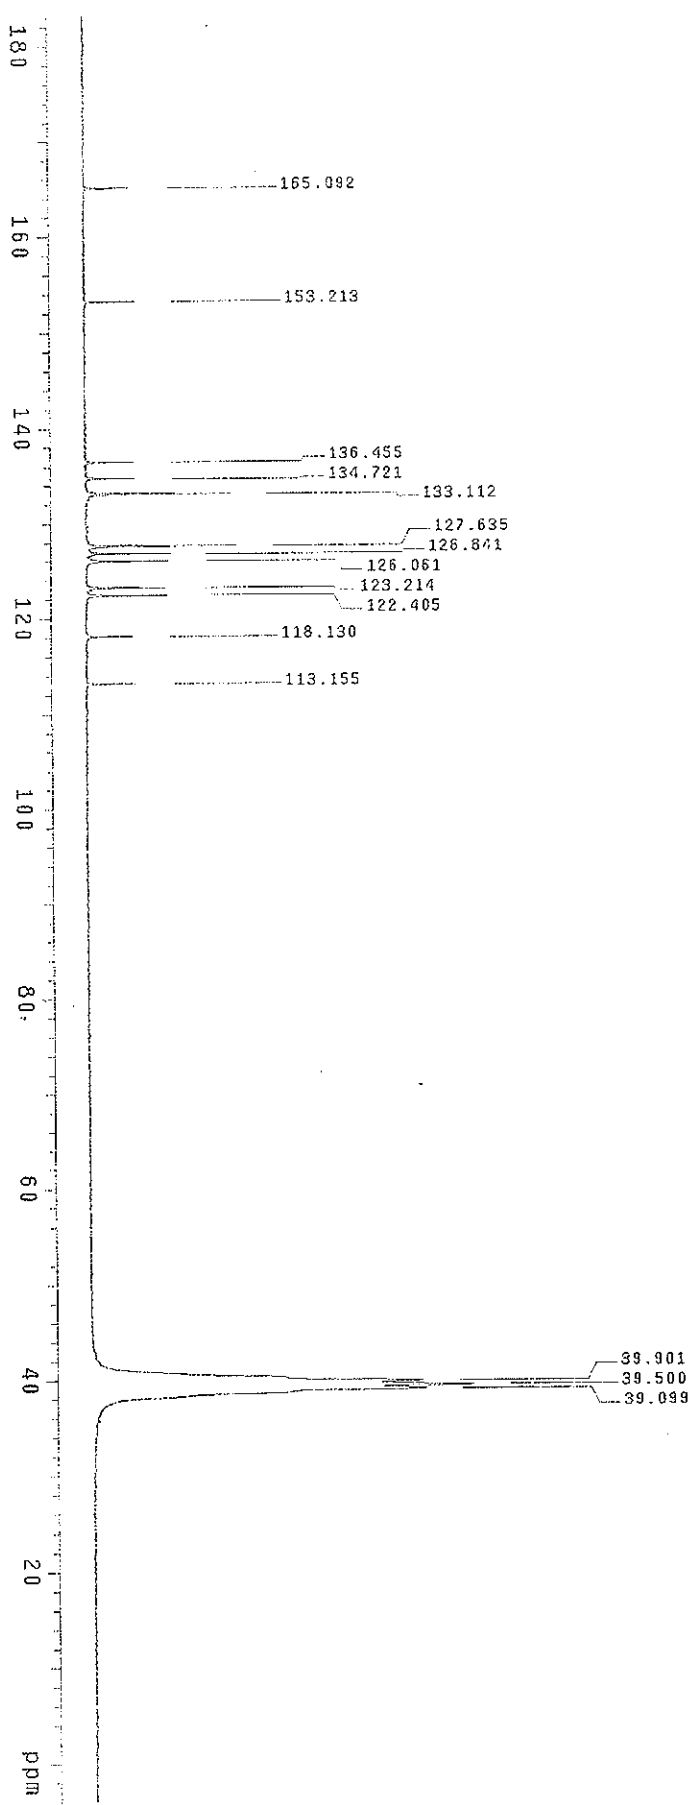

Elemental Composition Report

Single Mass Analysis

Tolerance = 5.0 PPM / DBE: min = -1.0, max = 80.0

Element prediction: Off

Number of isotope peaks used for i-FIT = 3

Monoisotopic Mass, Even Electron Ions

3 formula(e) evaluated with 1 results within limits (up to 4 best isotopic matches for each mass)

Elements Used:

C: 0-15 H: 0-10 N: 0-2 S: 0-1

Dr.Reddy's Laboratories Ltd, ARD,TDC-1

UT0312\_237 (0.131) Cm (5:9)

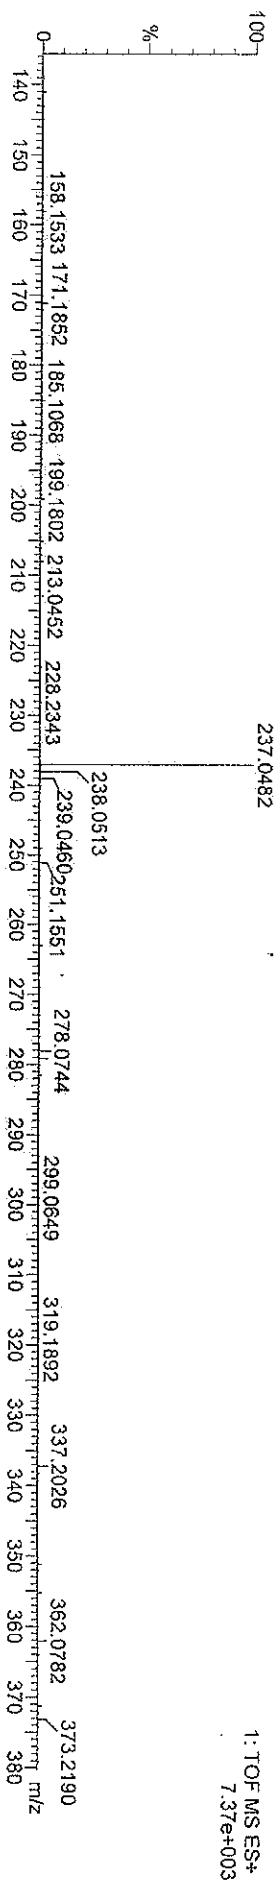

1: TOF MS ES+  
7.37e+003

Copies of spectra

|          |            |      |      |      |       |             |  |
|----------|------------|------|------|------|-------|-------------|--|
| Minimum: |            |      |      |      |       |             |  |
| Maximum: |            |      |      |      |       |             |  |
| Mass     | Calc. Mass | mDa  | PPM  | DBE  | i-FIT | Formula     |  |
| 237.0482 | 237.0486   | -0.4 | -1.7 | 11.5 | 1.0   | C14 H9 N2 S |  |

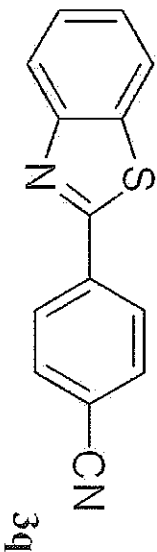

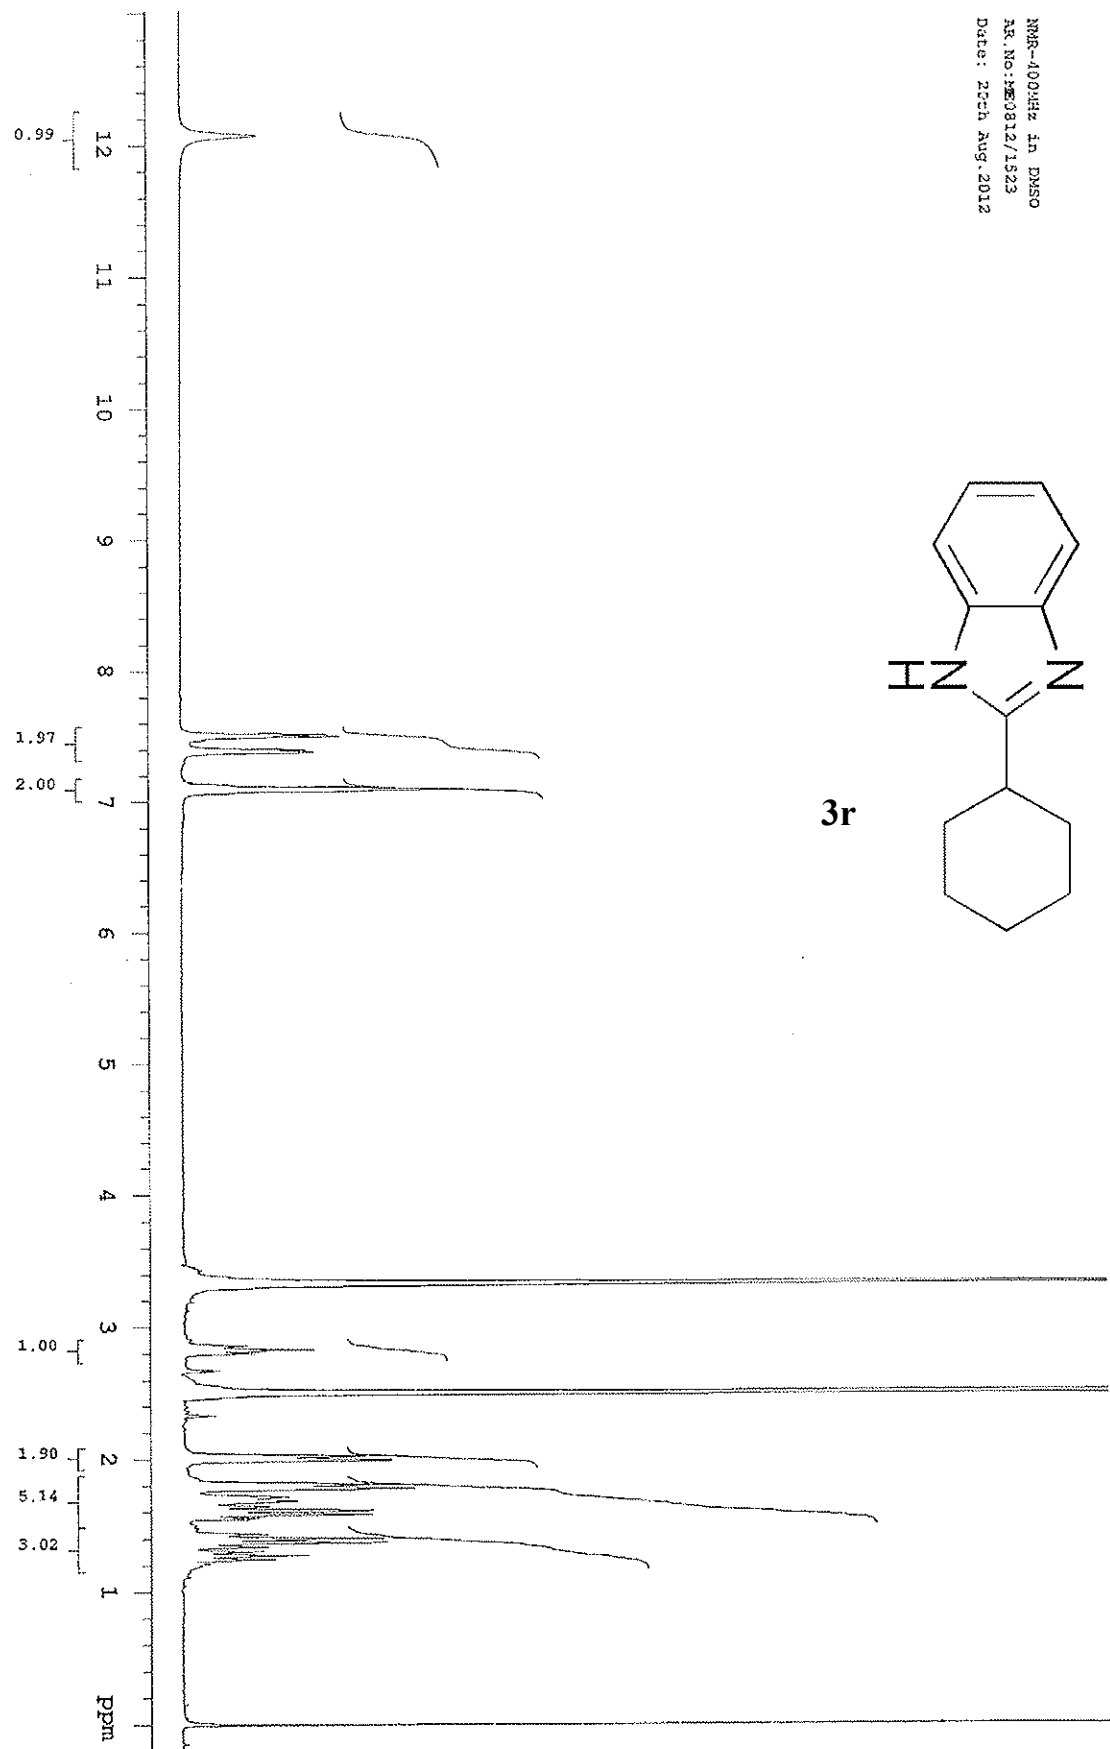

NMR-400MHz in DMSO  
Ac.No:HE0812/1523  
Date: 25th Aug.2012

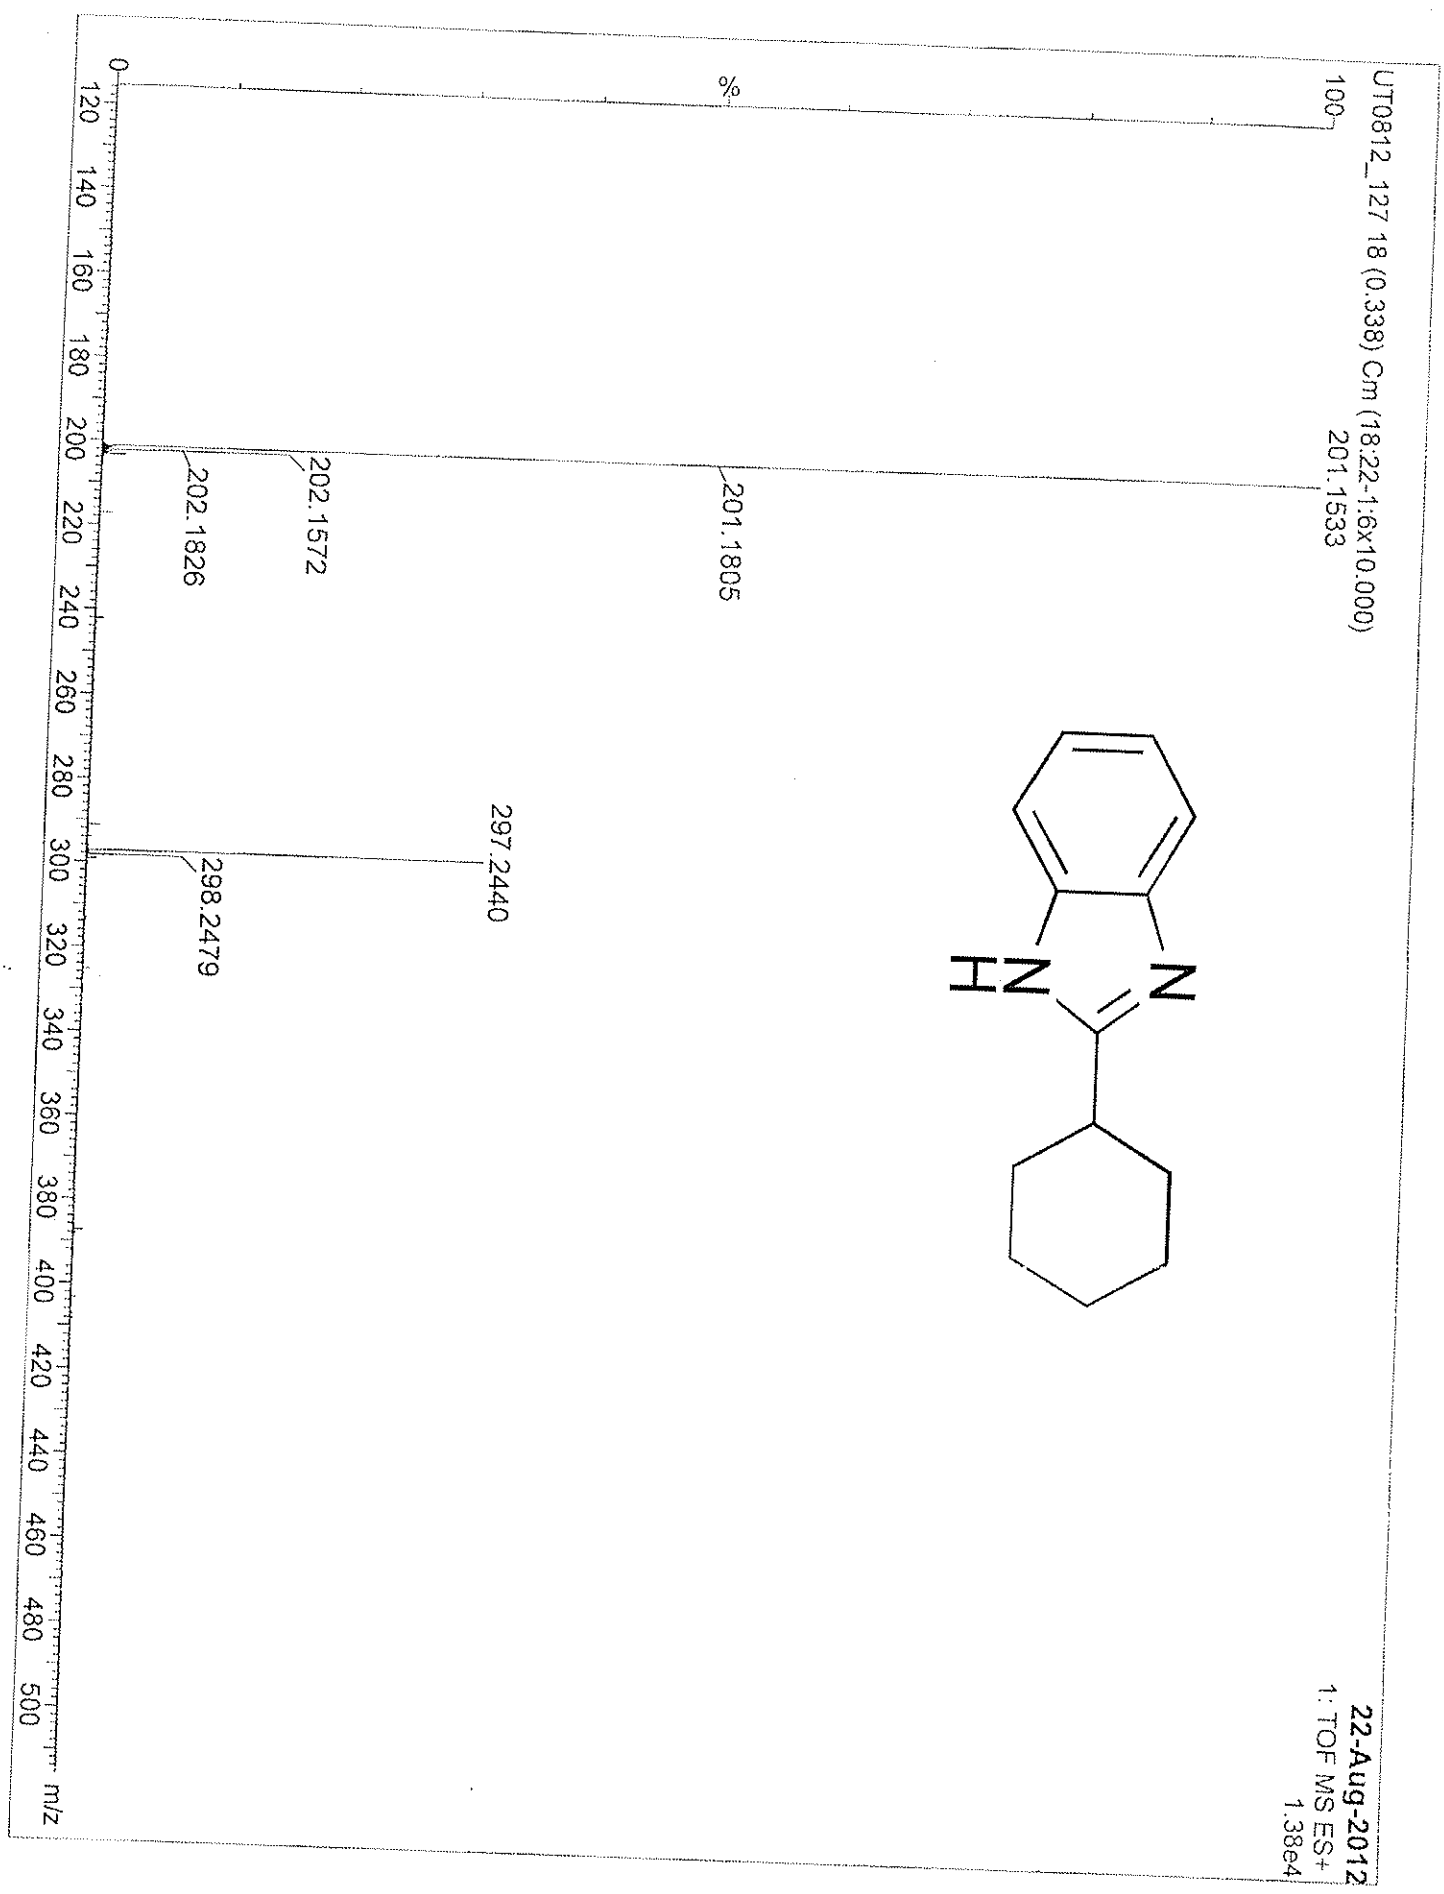

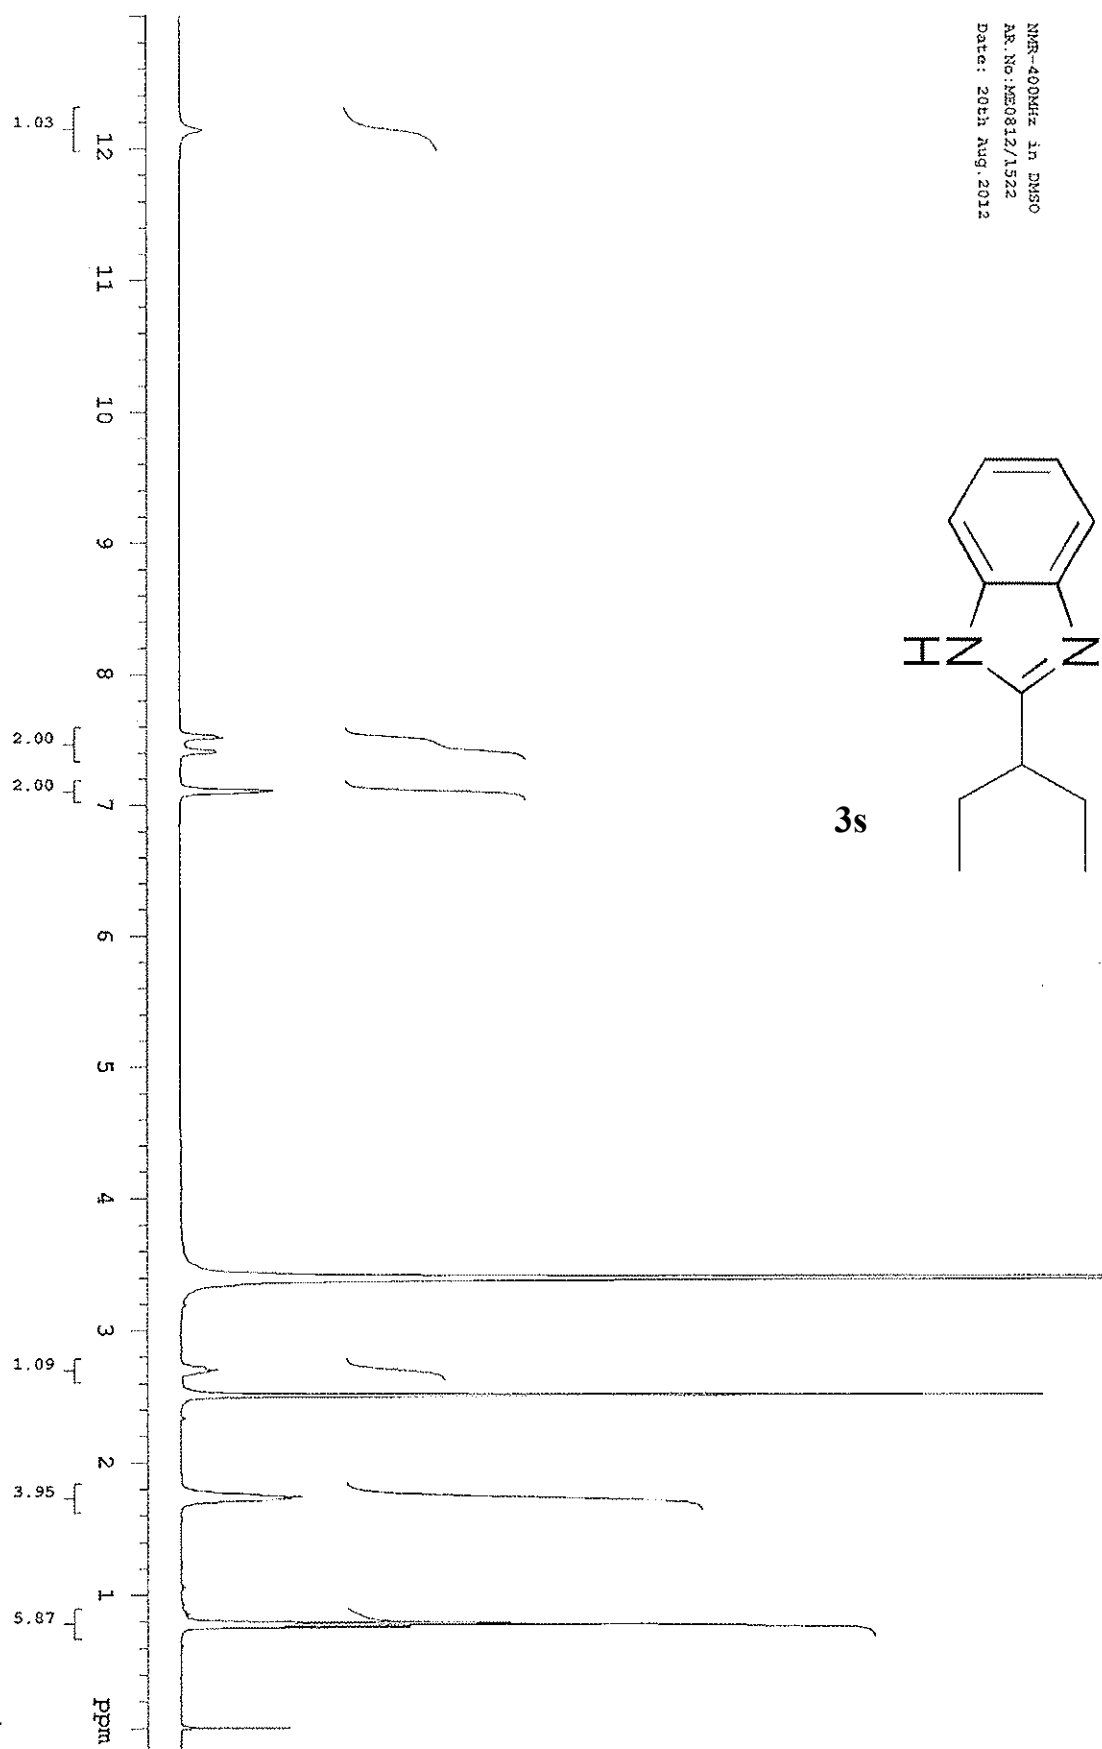

NMR-400MHz in DMSO  
Ac. No: ME0812/1522  
Date: 20th Aug. 2012

**3s**

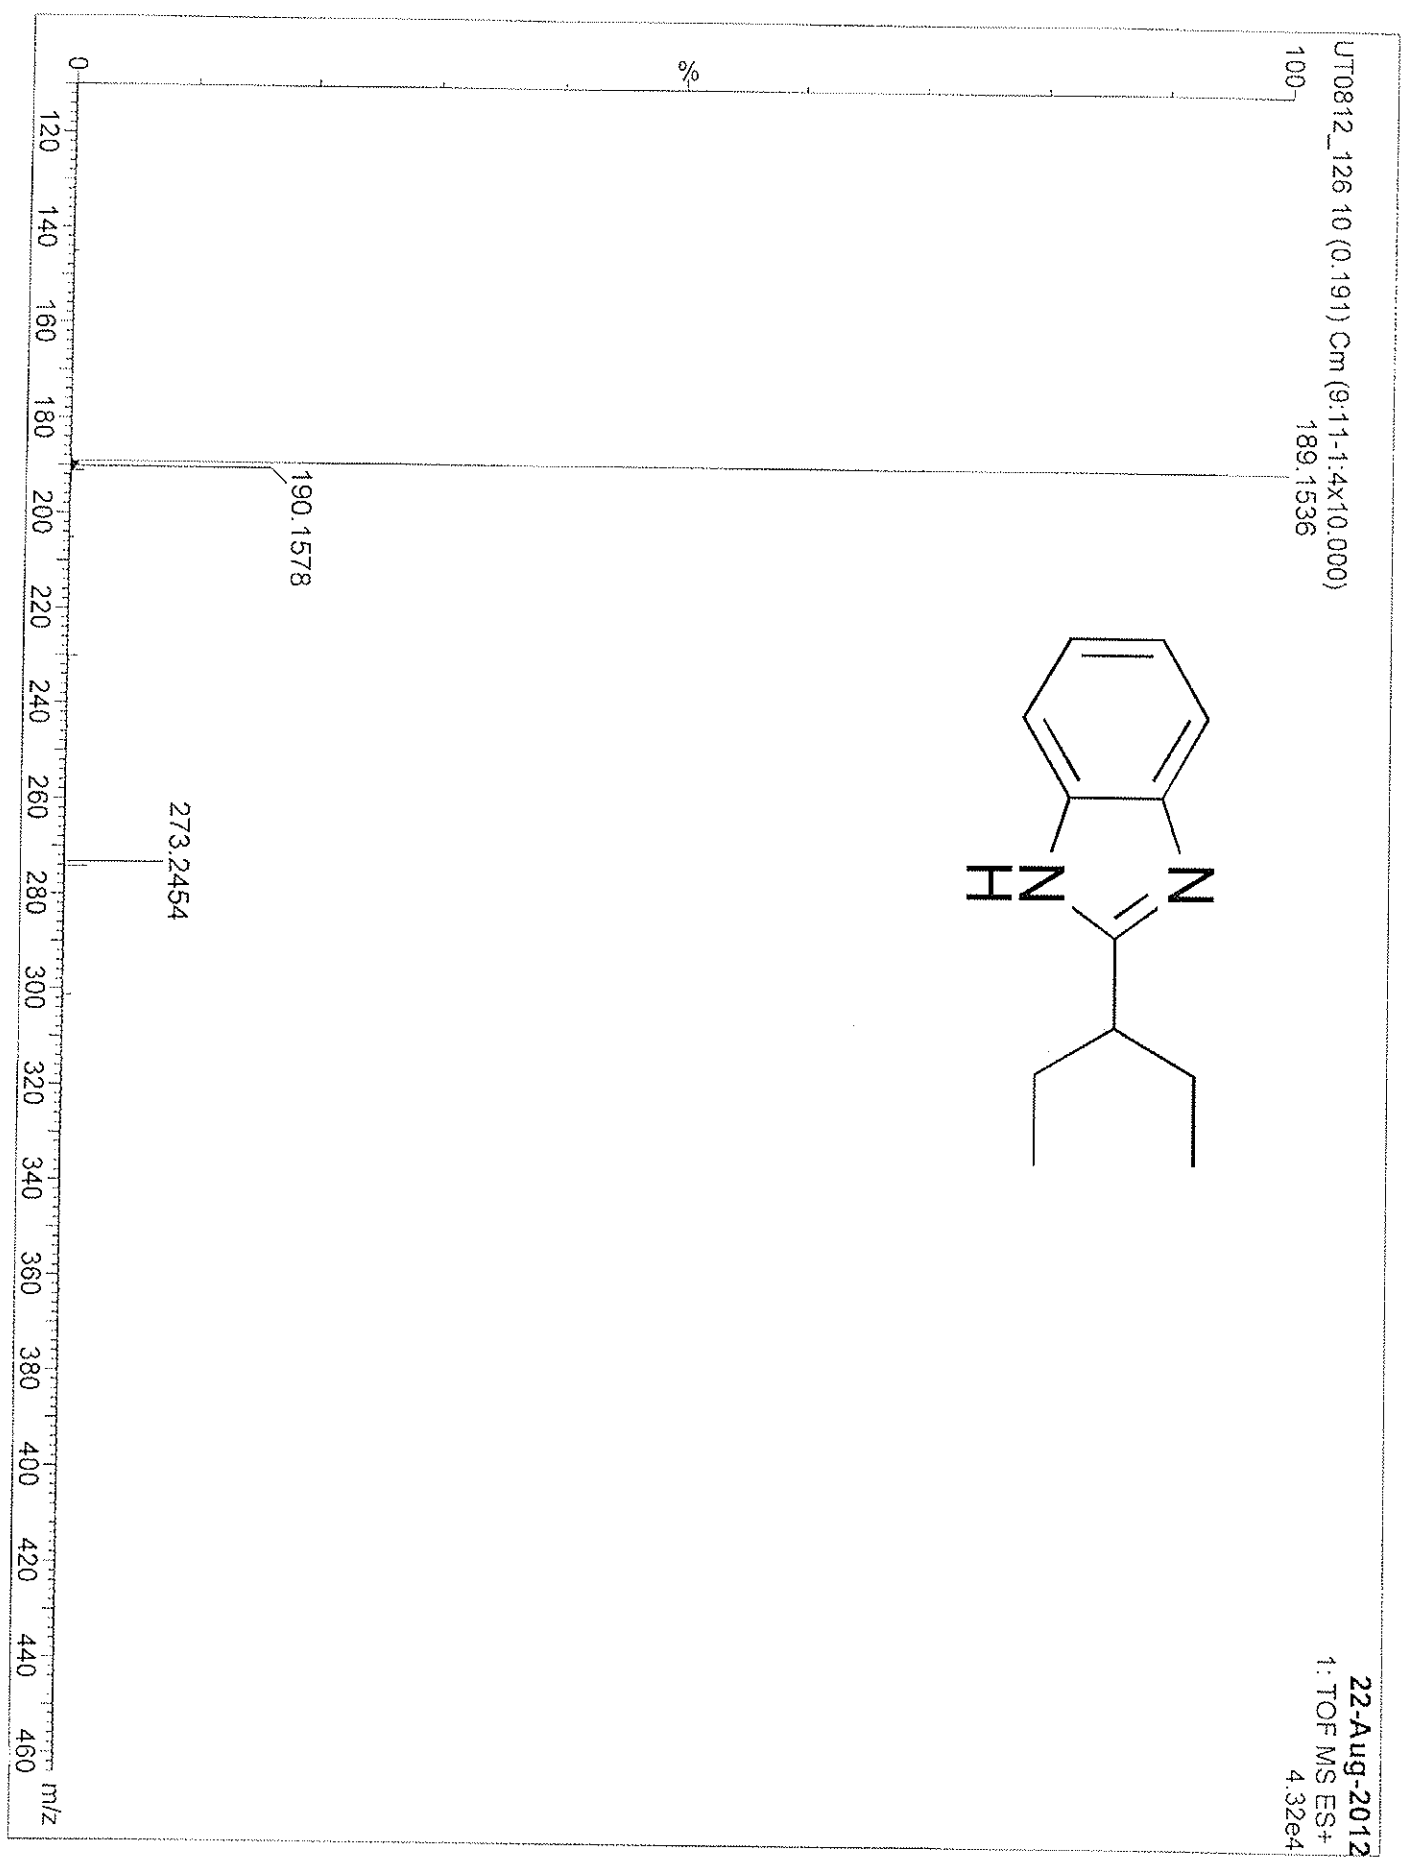



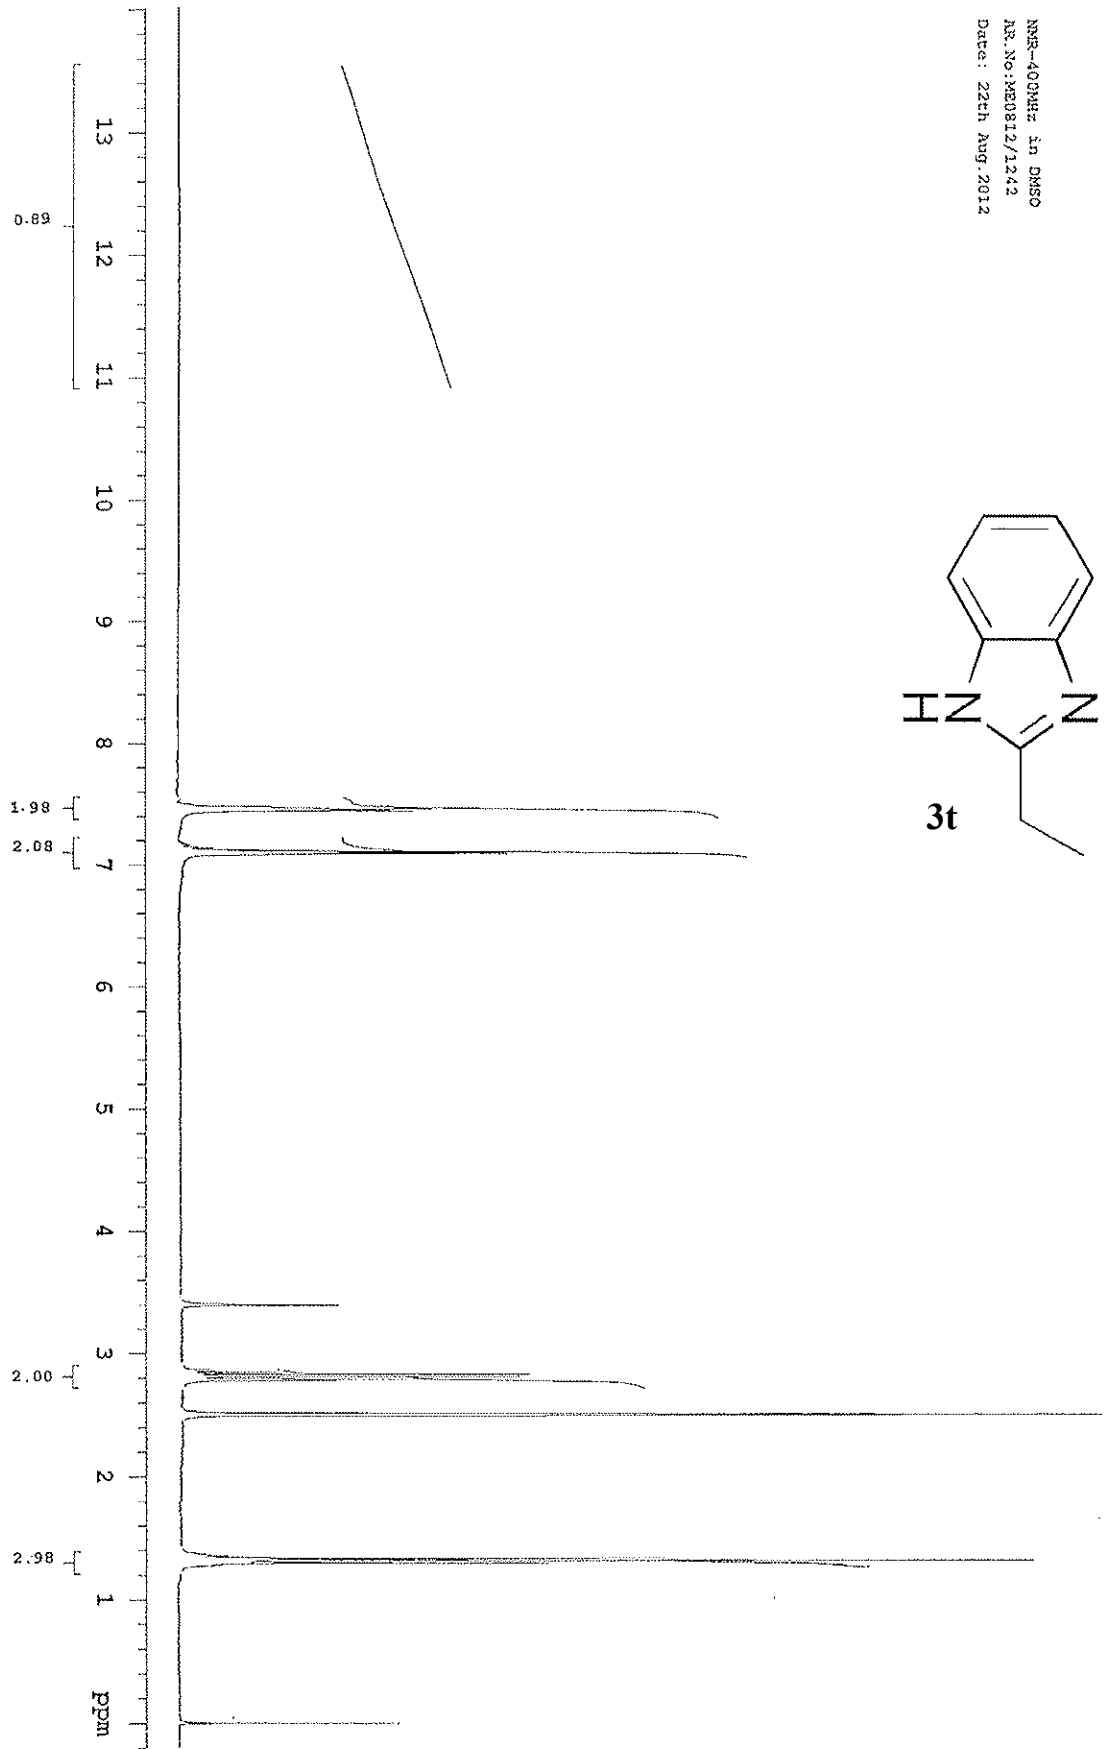

NR-400MHz in DMSO  
AR.No:ME0812/1242  
Date: 22th Aug.2012

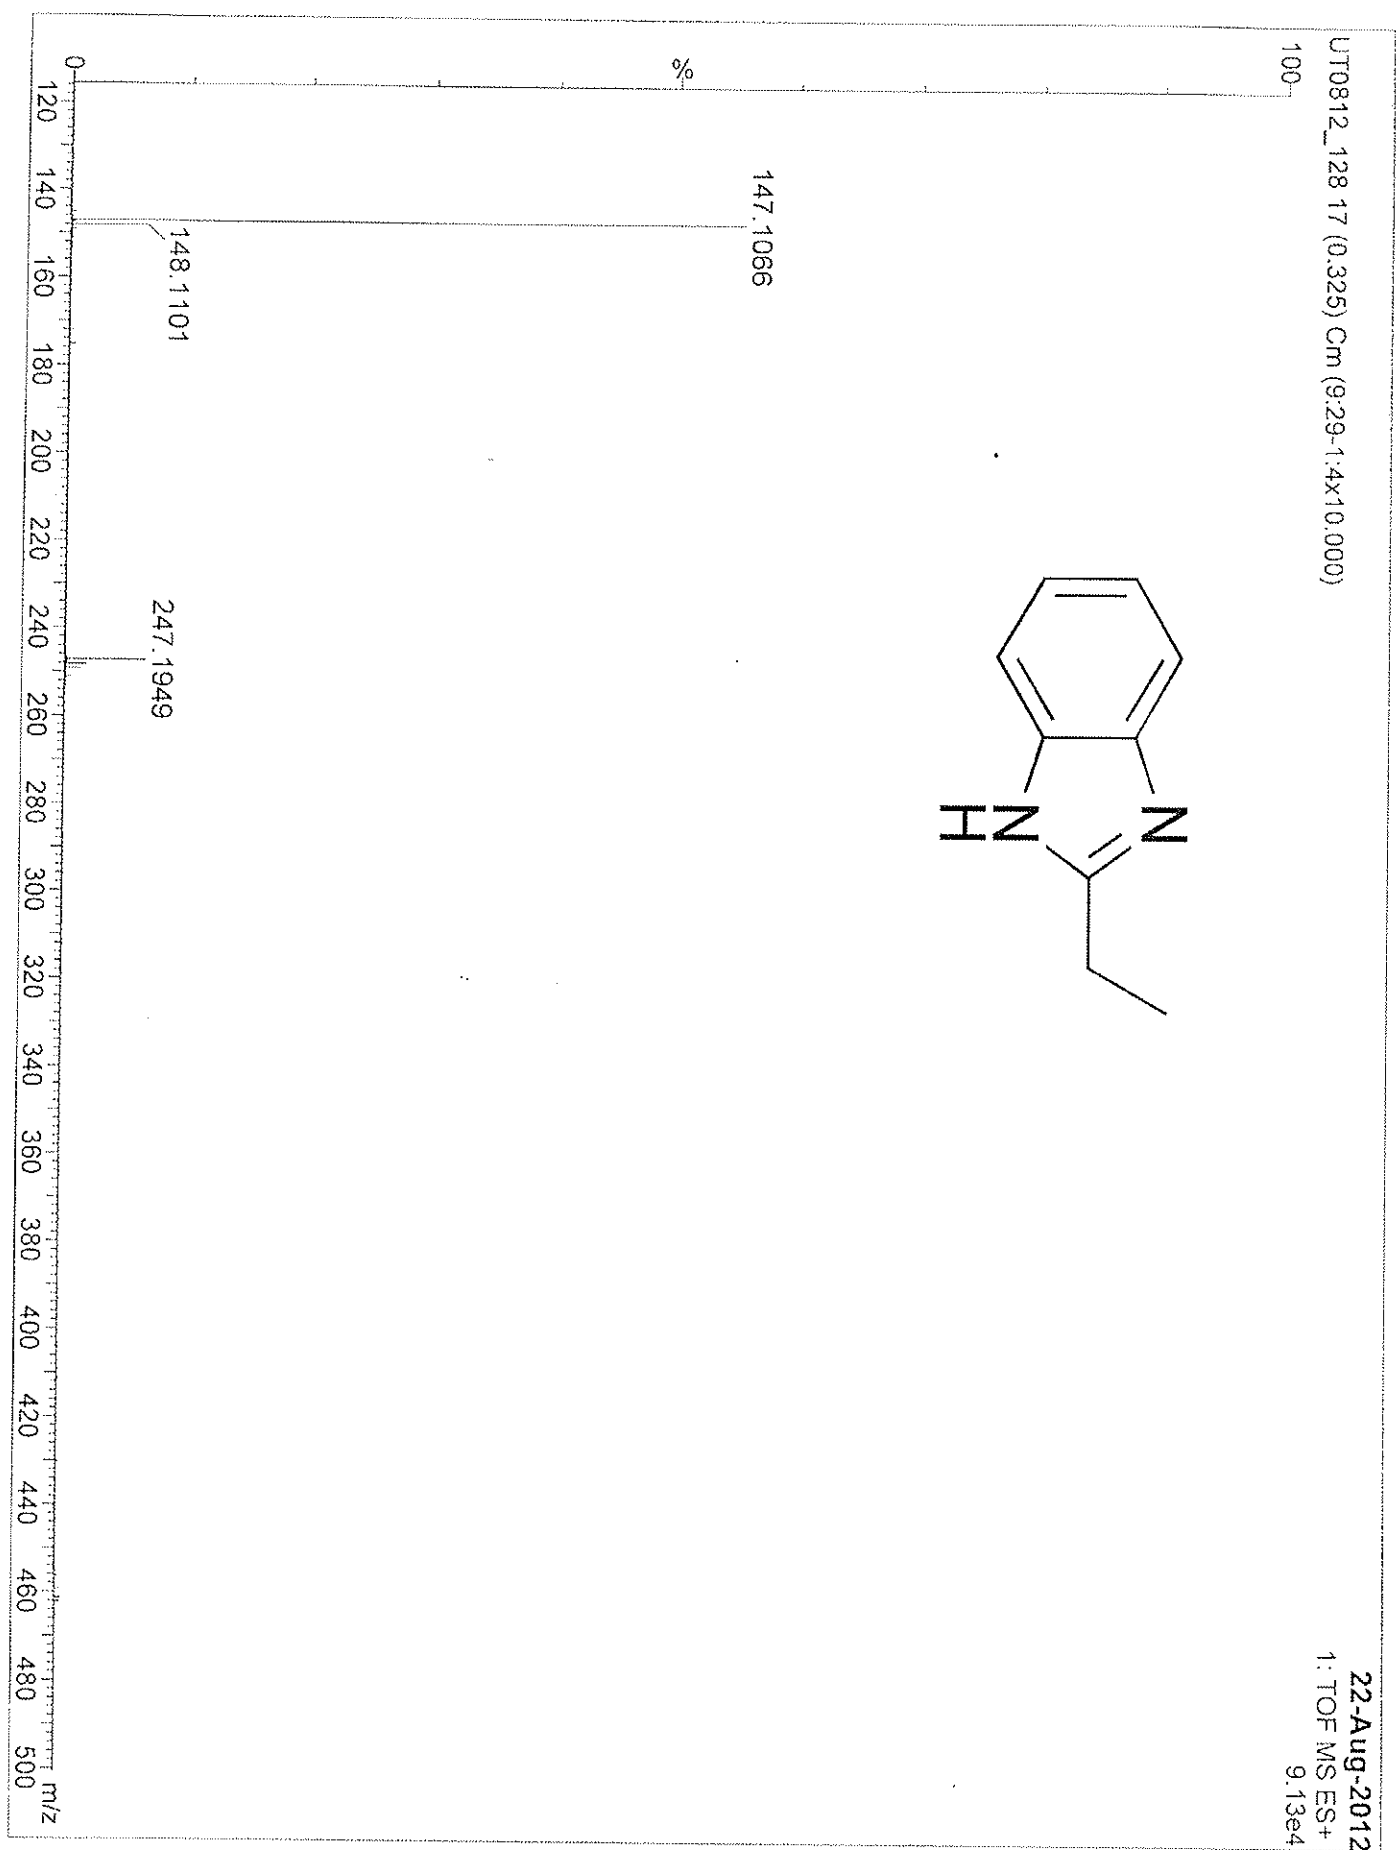

Copies of spectra

NMR-400 in DMSO  
AS.No:ME0810/999  
Date:12 th Aug 2010

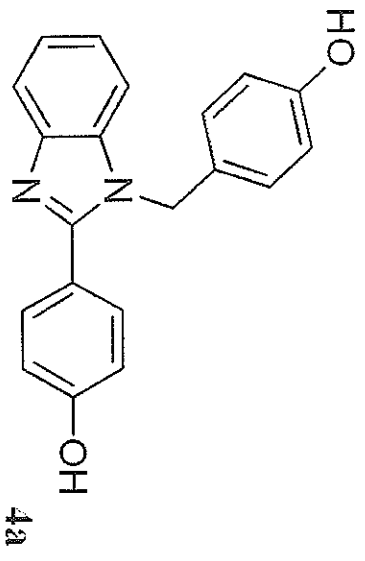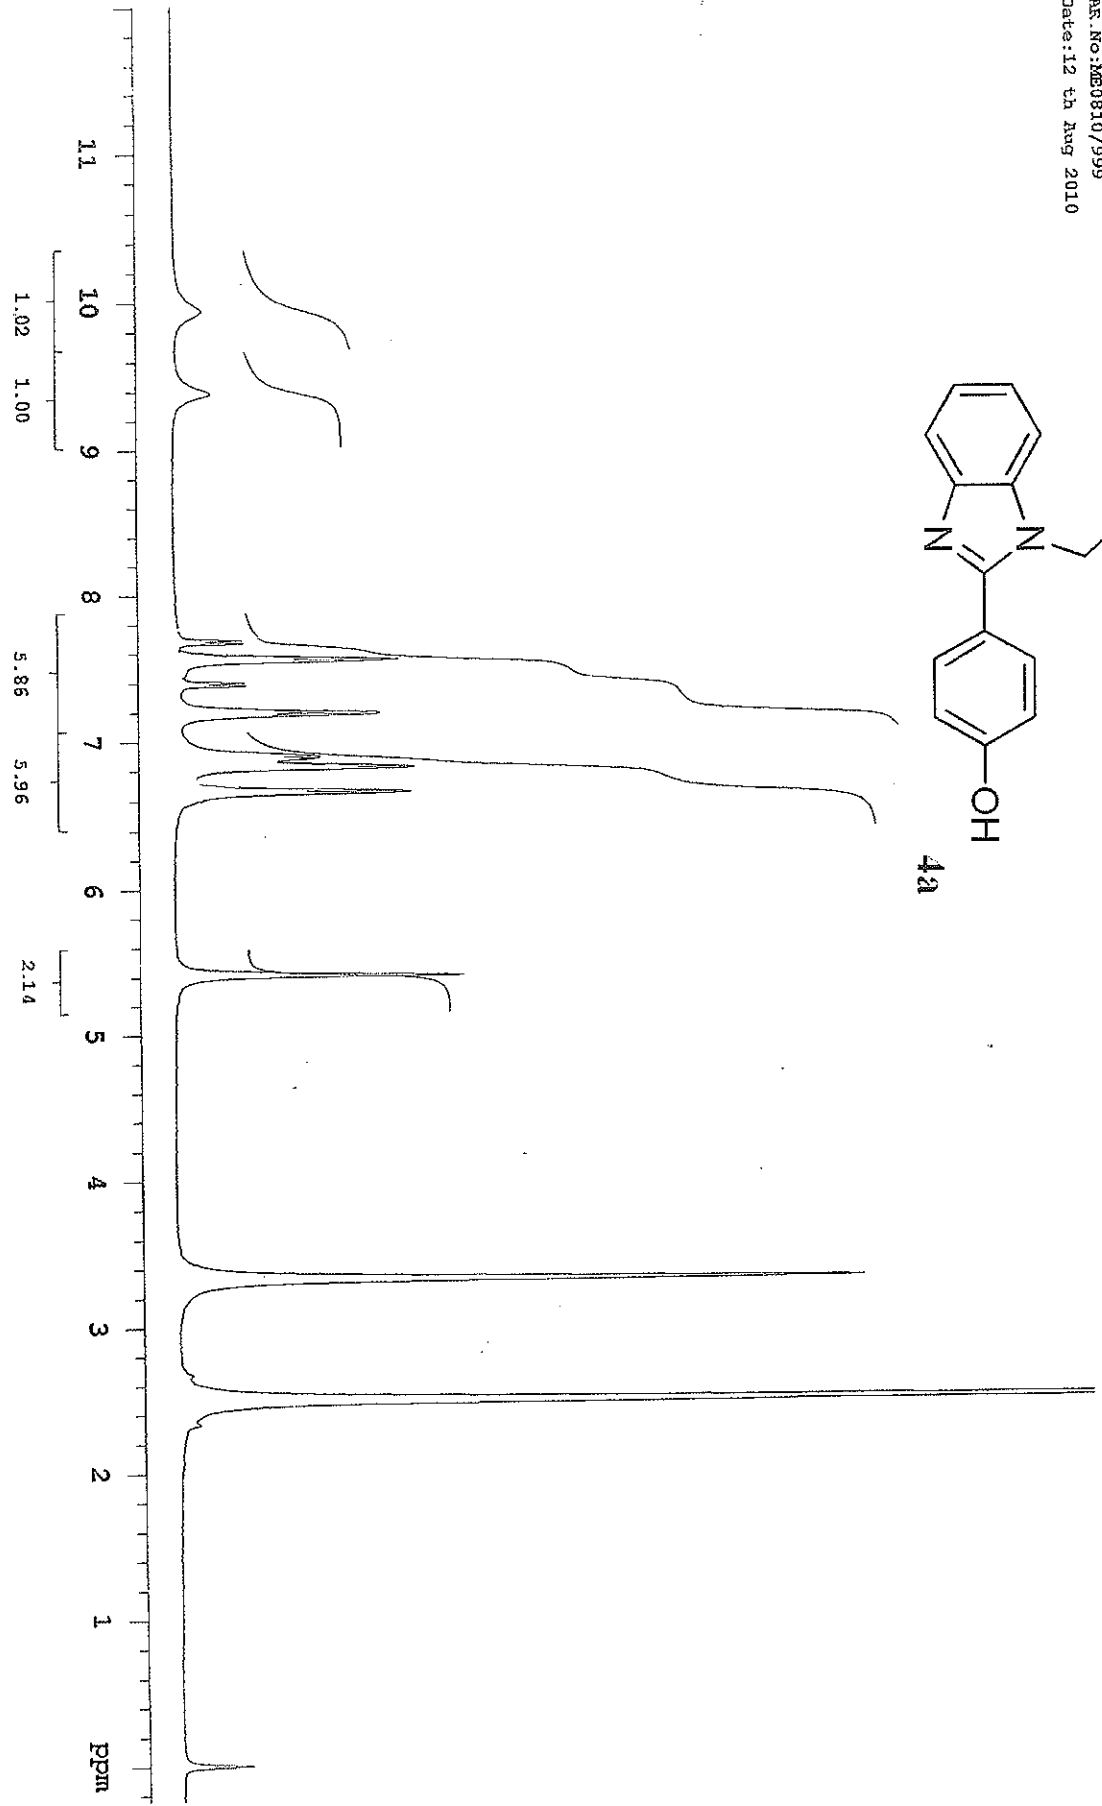

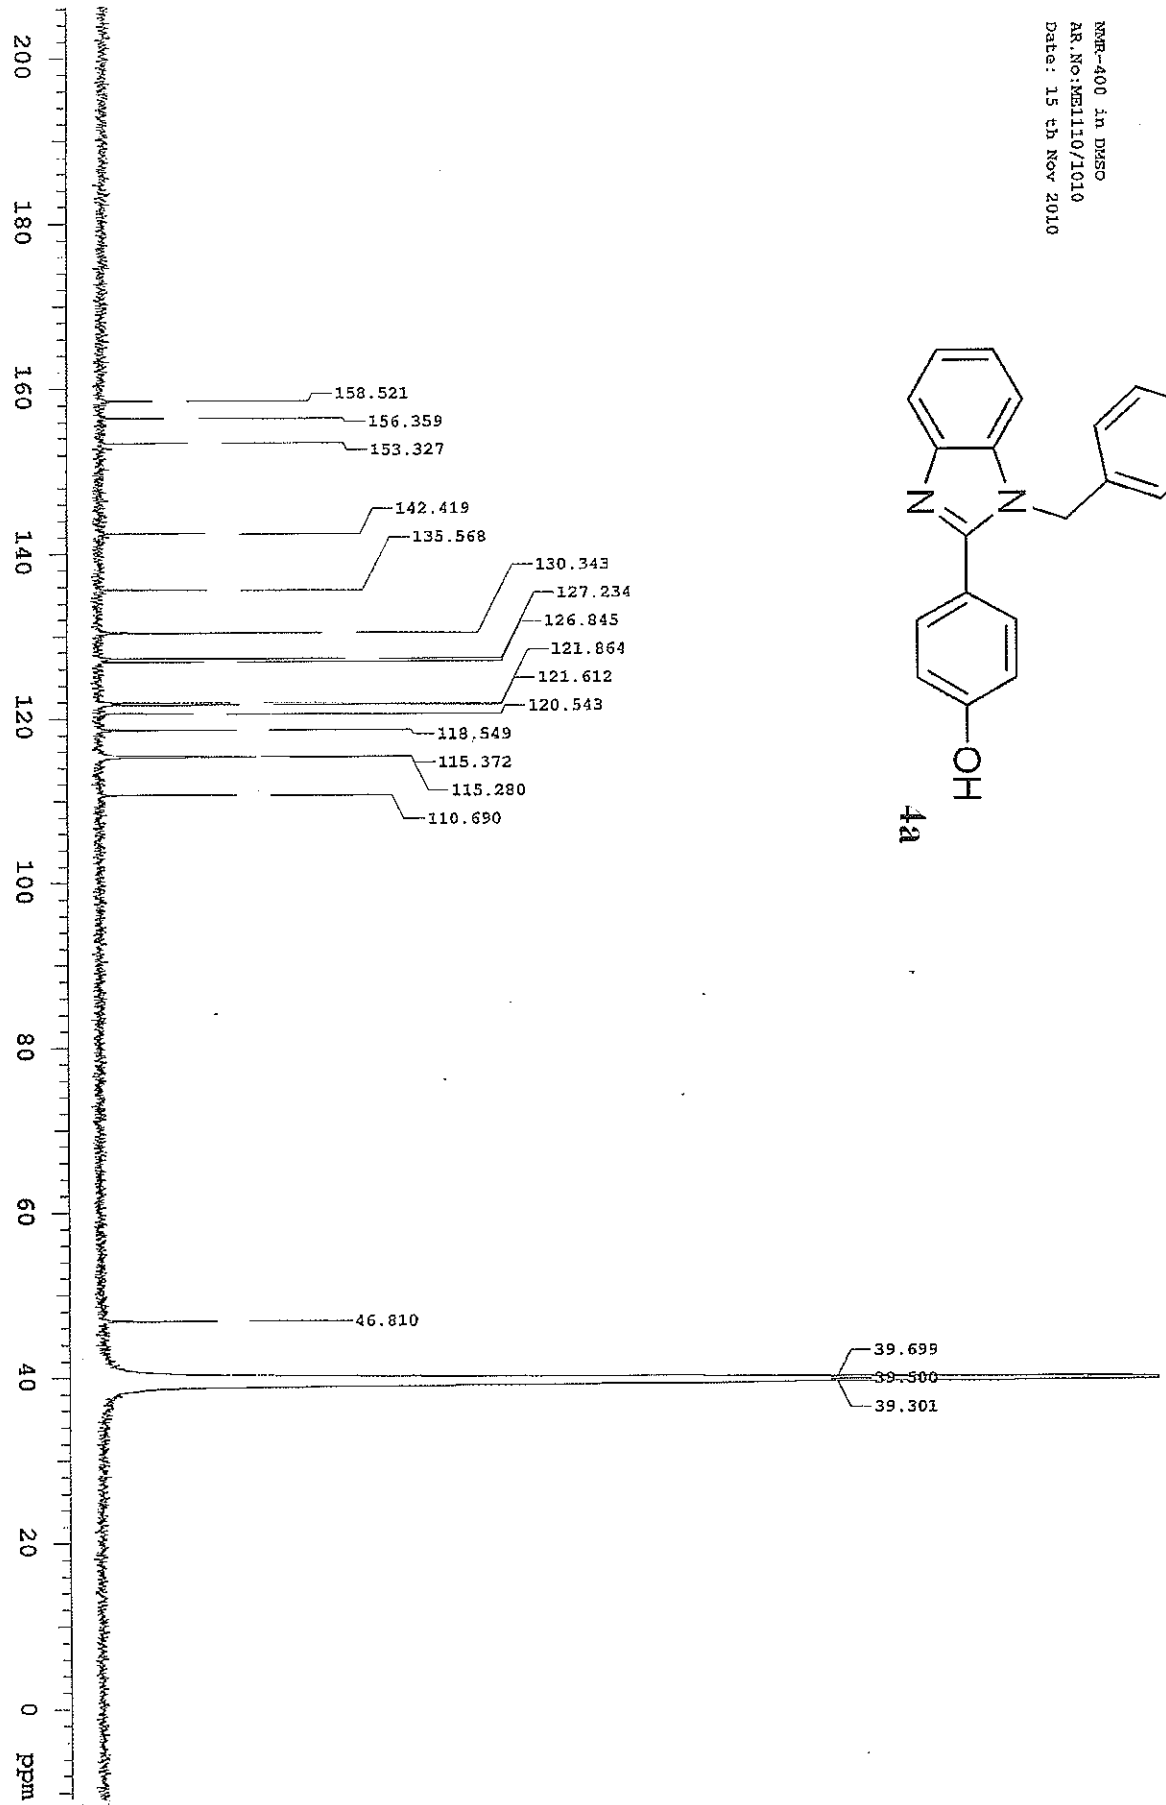

NR-400 in DMSO  
AR, No: ME110/1010  
Date: 15 th Nov 2010

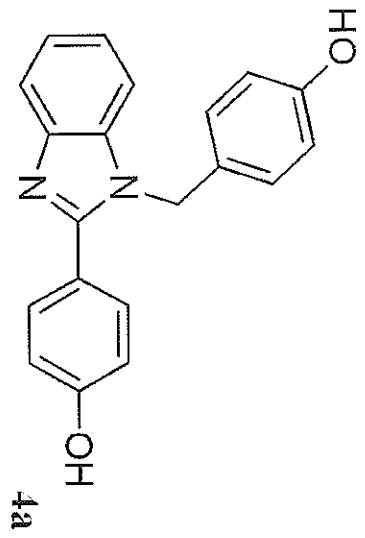

# Elemental Composition Report

## Single Mass Analysis

Tolerance = 5.0 PPM / DBE: min = -1.0, max = 80.0

Element prediction: Off

Number of isotope peaks used for i-FIT = 3

Monoisotopic Mass, Even Electron Ions

4 formula(e) evaluated with 1 results within limits (up to 4 best isotopic matches for each mass)

Elements Used:

C: 0-20 H: 0-20 N: 0-2 O: 0-2

UT0312\_19 5 (0.103) Cm (4:10)

Dr.Reddy's Laboratories Ltd, ARD, TDC-1

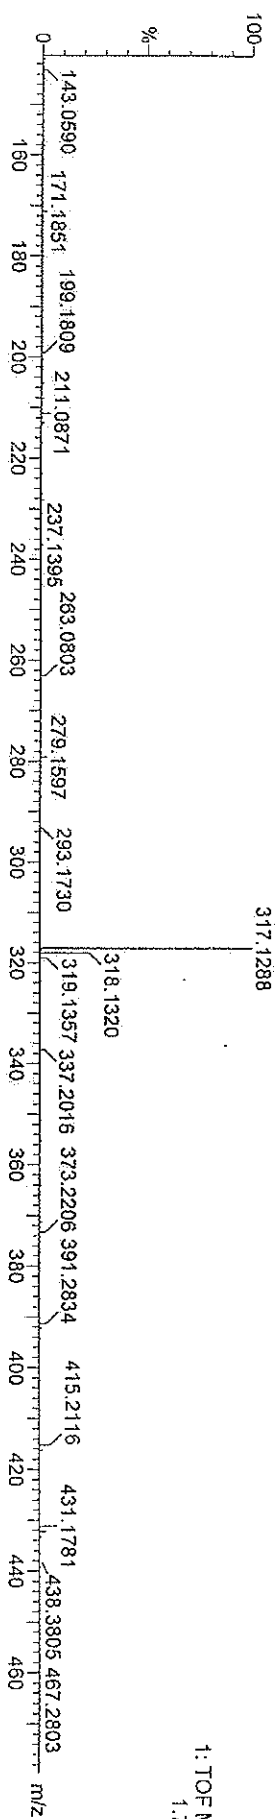

Copies of spectra

|          |            |      |      |      |       |               |
|----------|------------|------|------|------|-------|---------------|
| Minimum: |            |      |      |      |       |               |
| Maximum: |            |      |      |      |       |               |
| Mass     | Calc. Mass | mDa  | PPM  | DBE  | i-FIT | Formula       |
| 317.1288 | 317.1290   | -0.2 | -0.6 | 13.5 | 0.4   | C20 H17 N2 O2 |

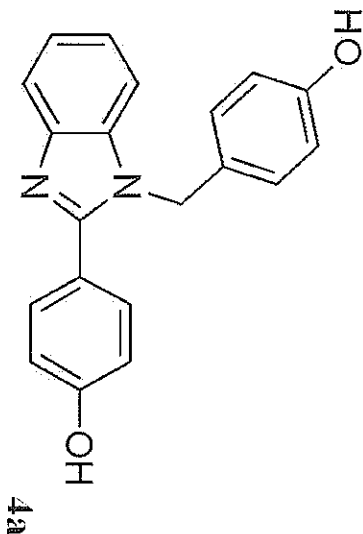

Copies of spectra

nmr-400 in DMSO  
AR.No:ME0910/1770  
Date:29th Sept 2010

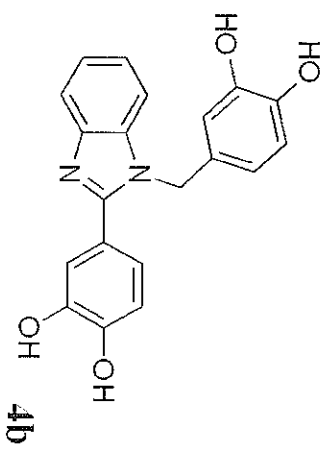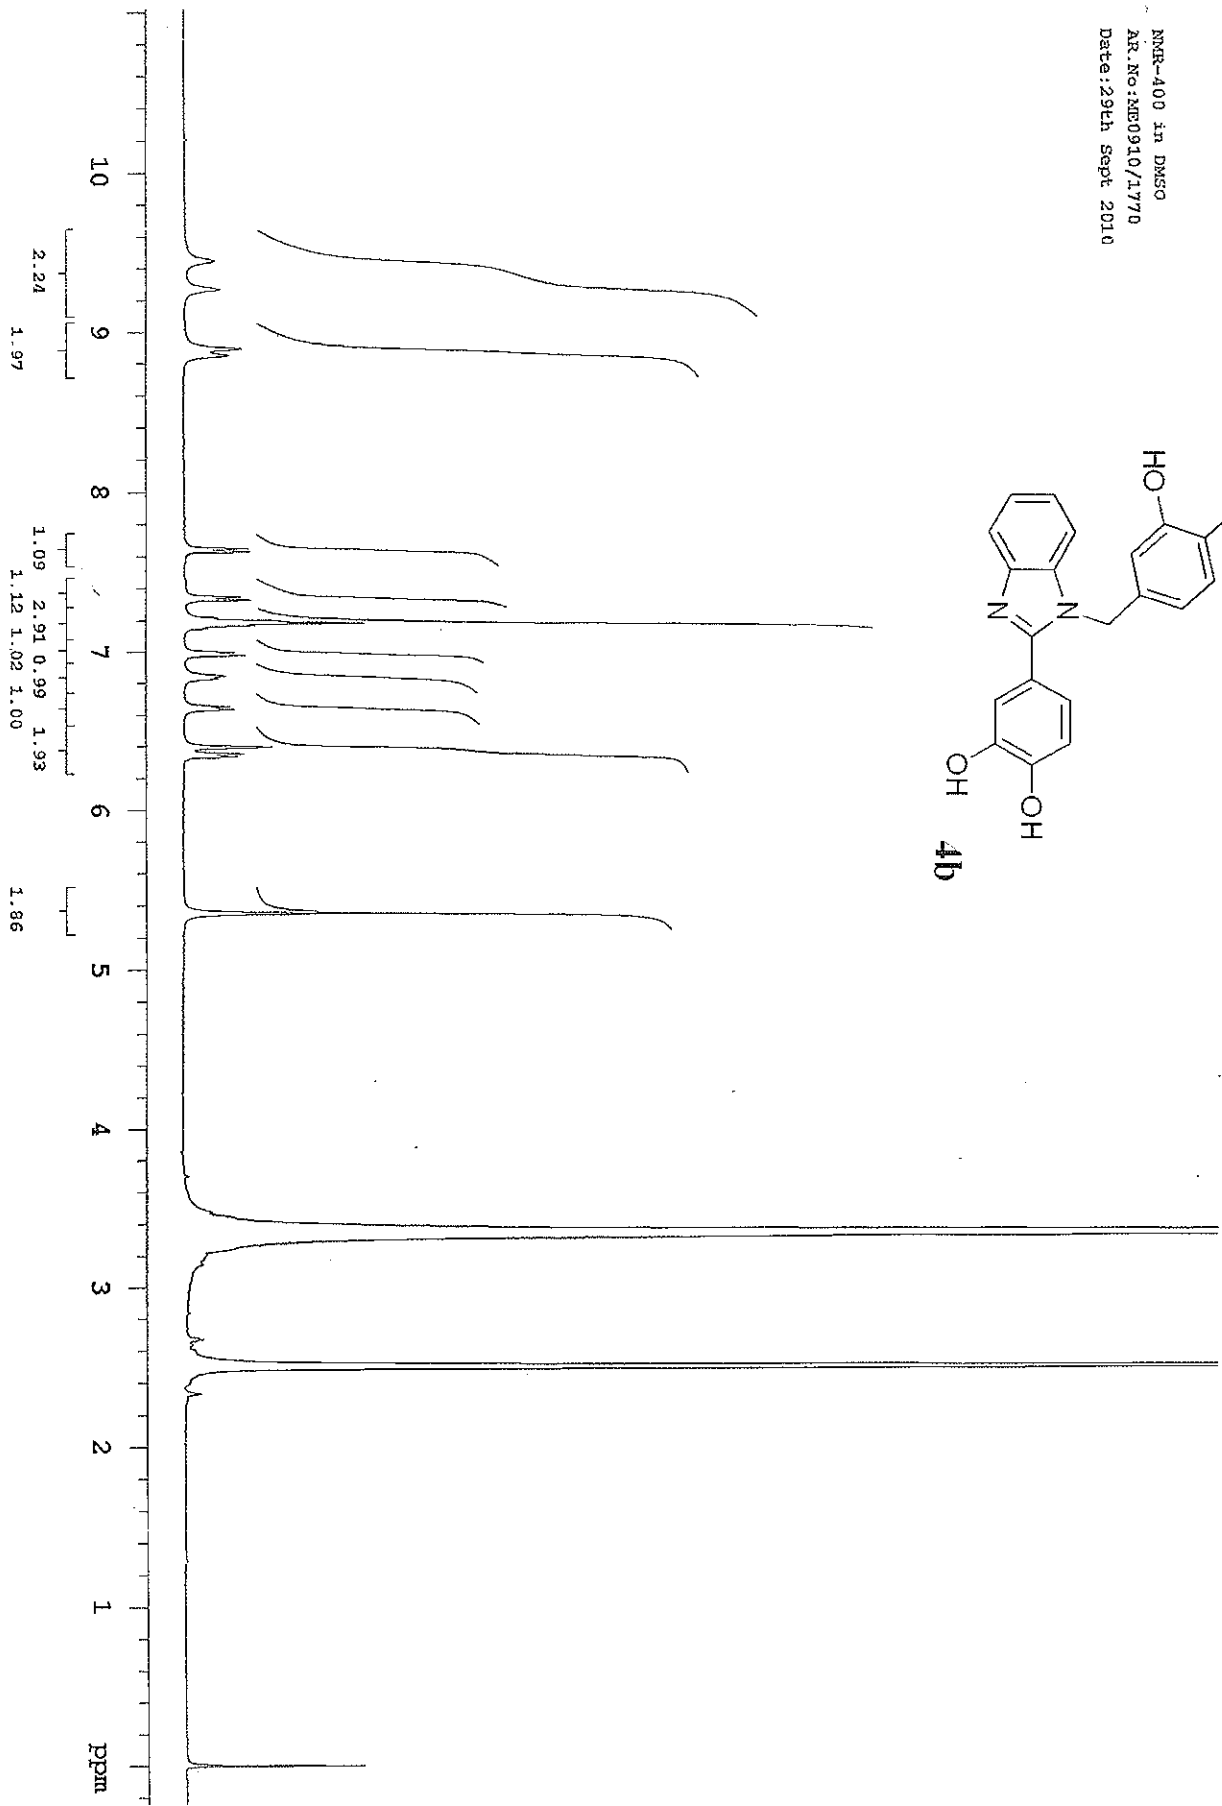

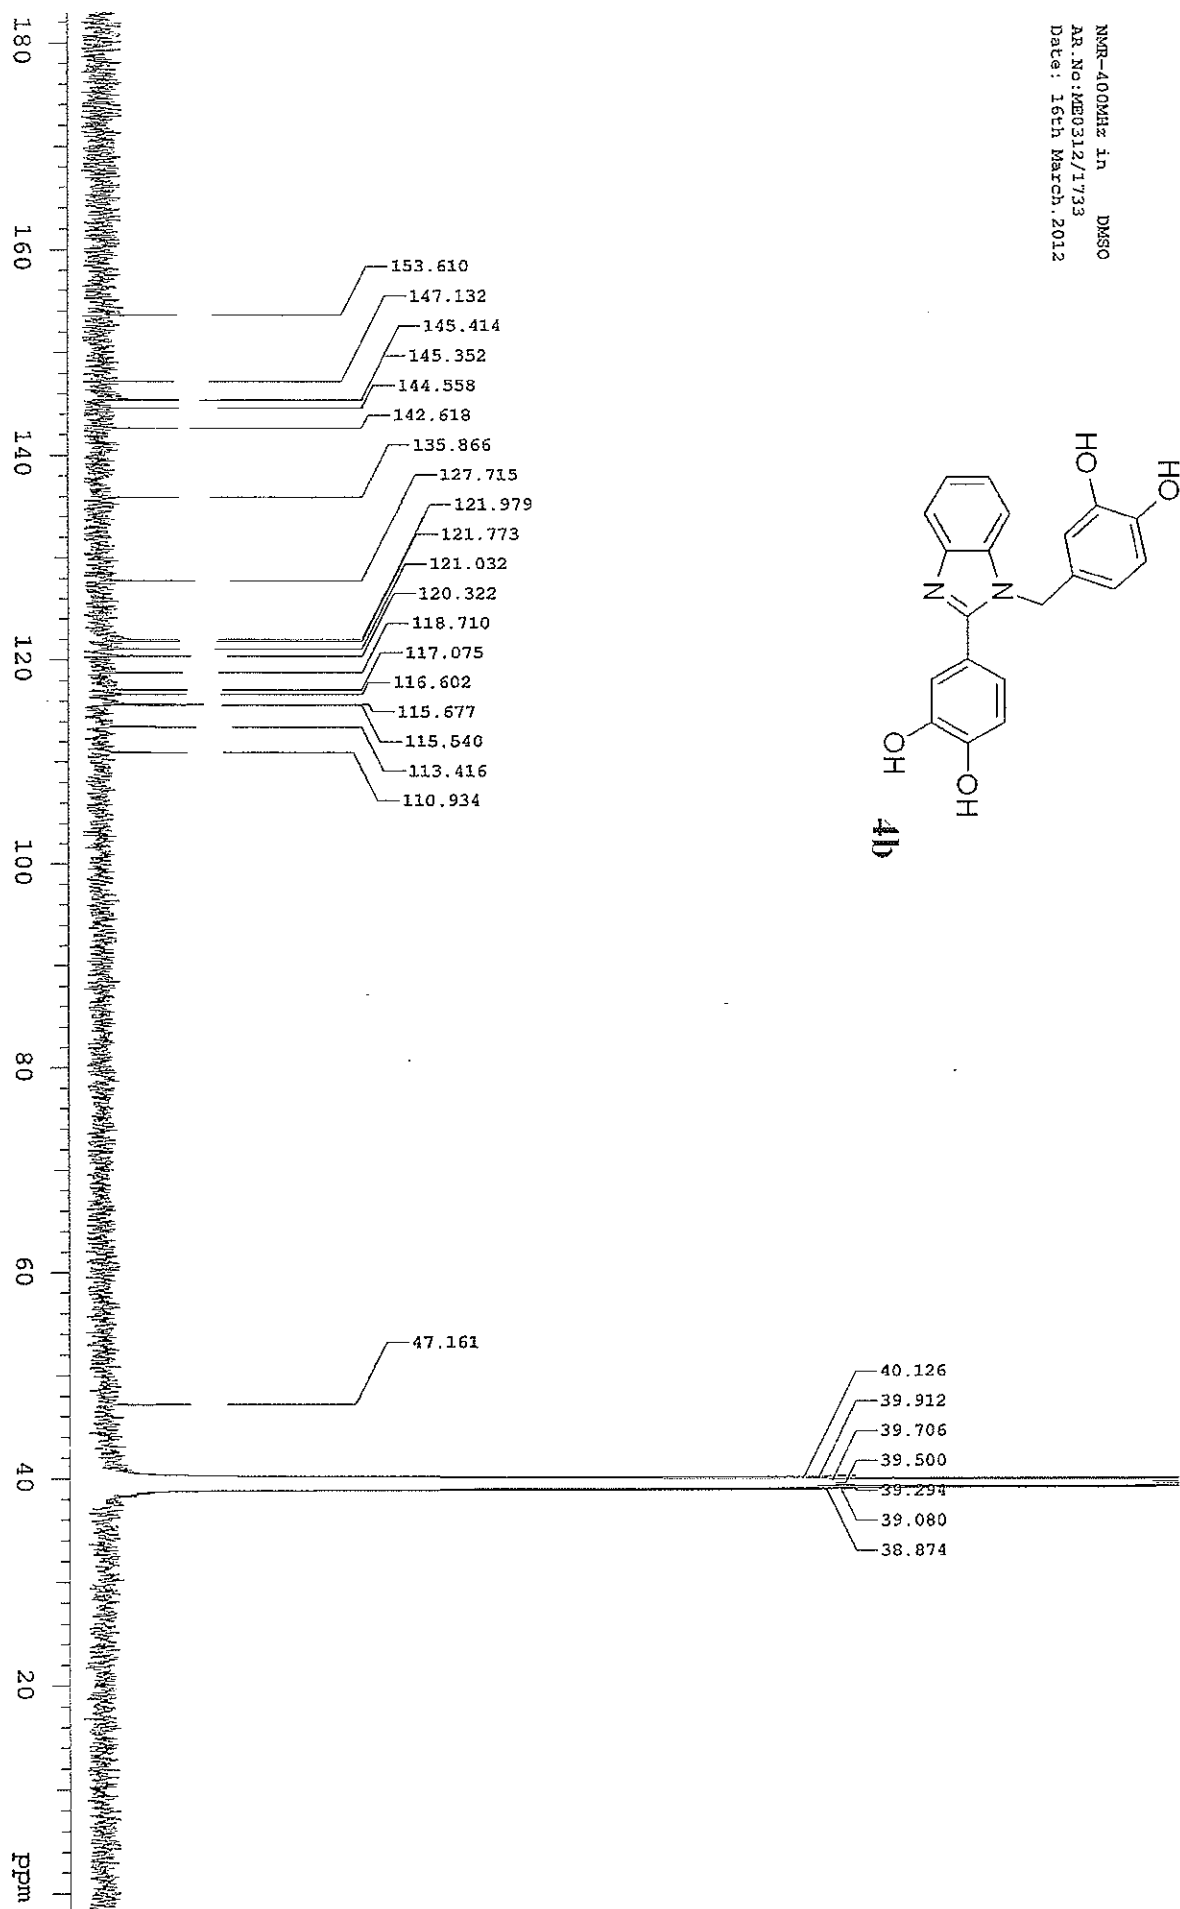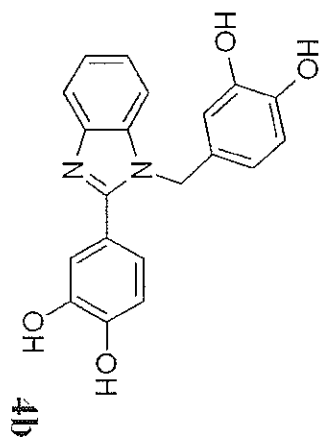

# Elemental Composition Report

## Single Mass Analysis

Tolerance = 5.0 PPM / DBE: min = -1.0, max = 80.0

Element prediction: Off

Number of isotope peaks used for I-FIT = 3

Monoisotopic Mass, Even Electron Ions

10 formula(e) evaluated with 1 results within limits (up to 4 best isotopic matches for each mass)

Elements Used:

C: 0-20 H: 0-20 N: 0-2 O: 0-4

UT0312\_89 31 (0.575) Cm (31.39)

Dr.Reddy's Laboratories Ltd, ARD,TDC-1

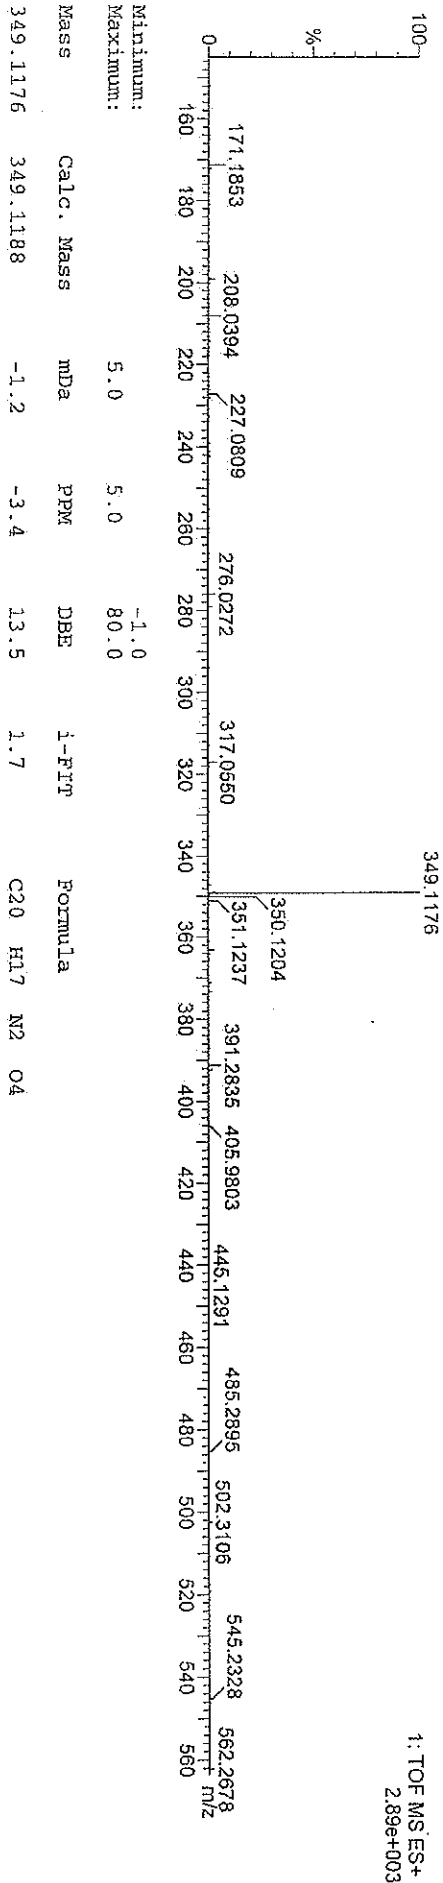

Copies of spectra

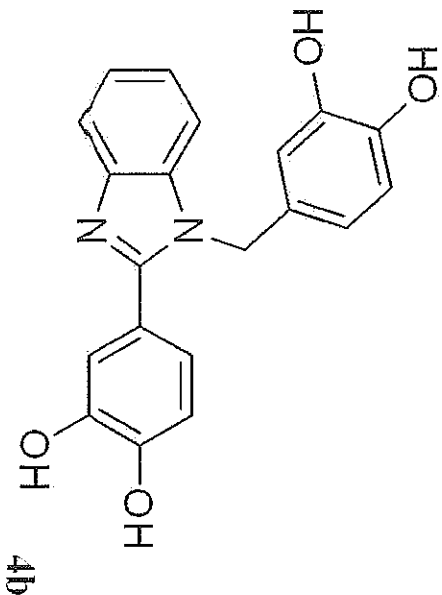



NMR-400 in DMSO  
Ac.No: ME1010/934  
Date: 12th Oct. 2010

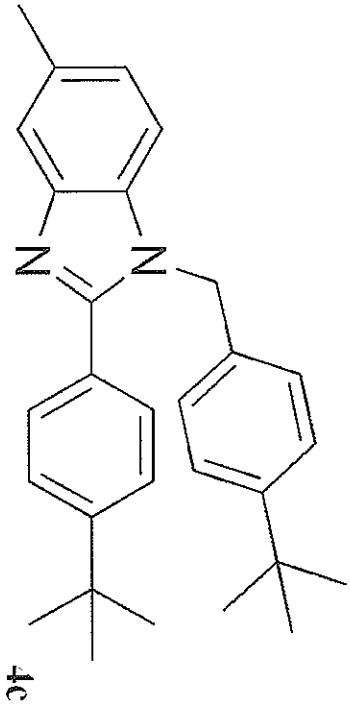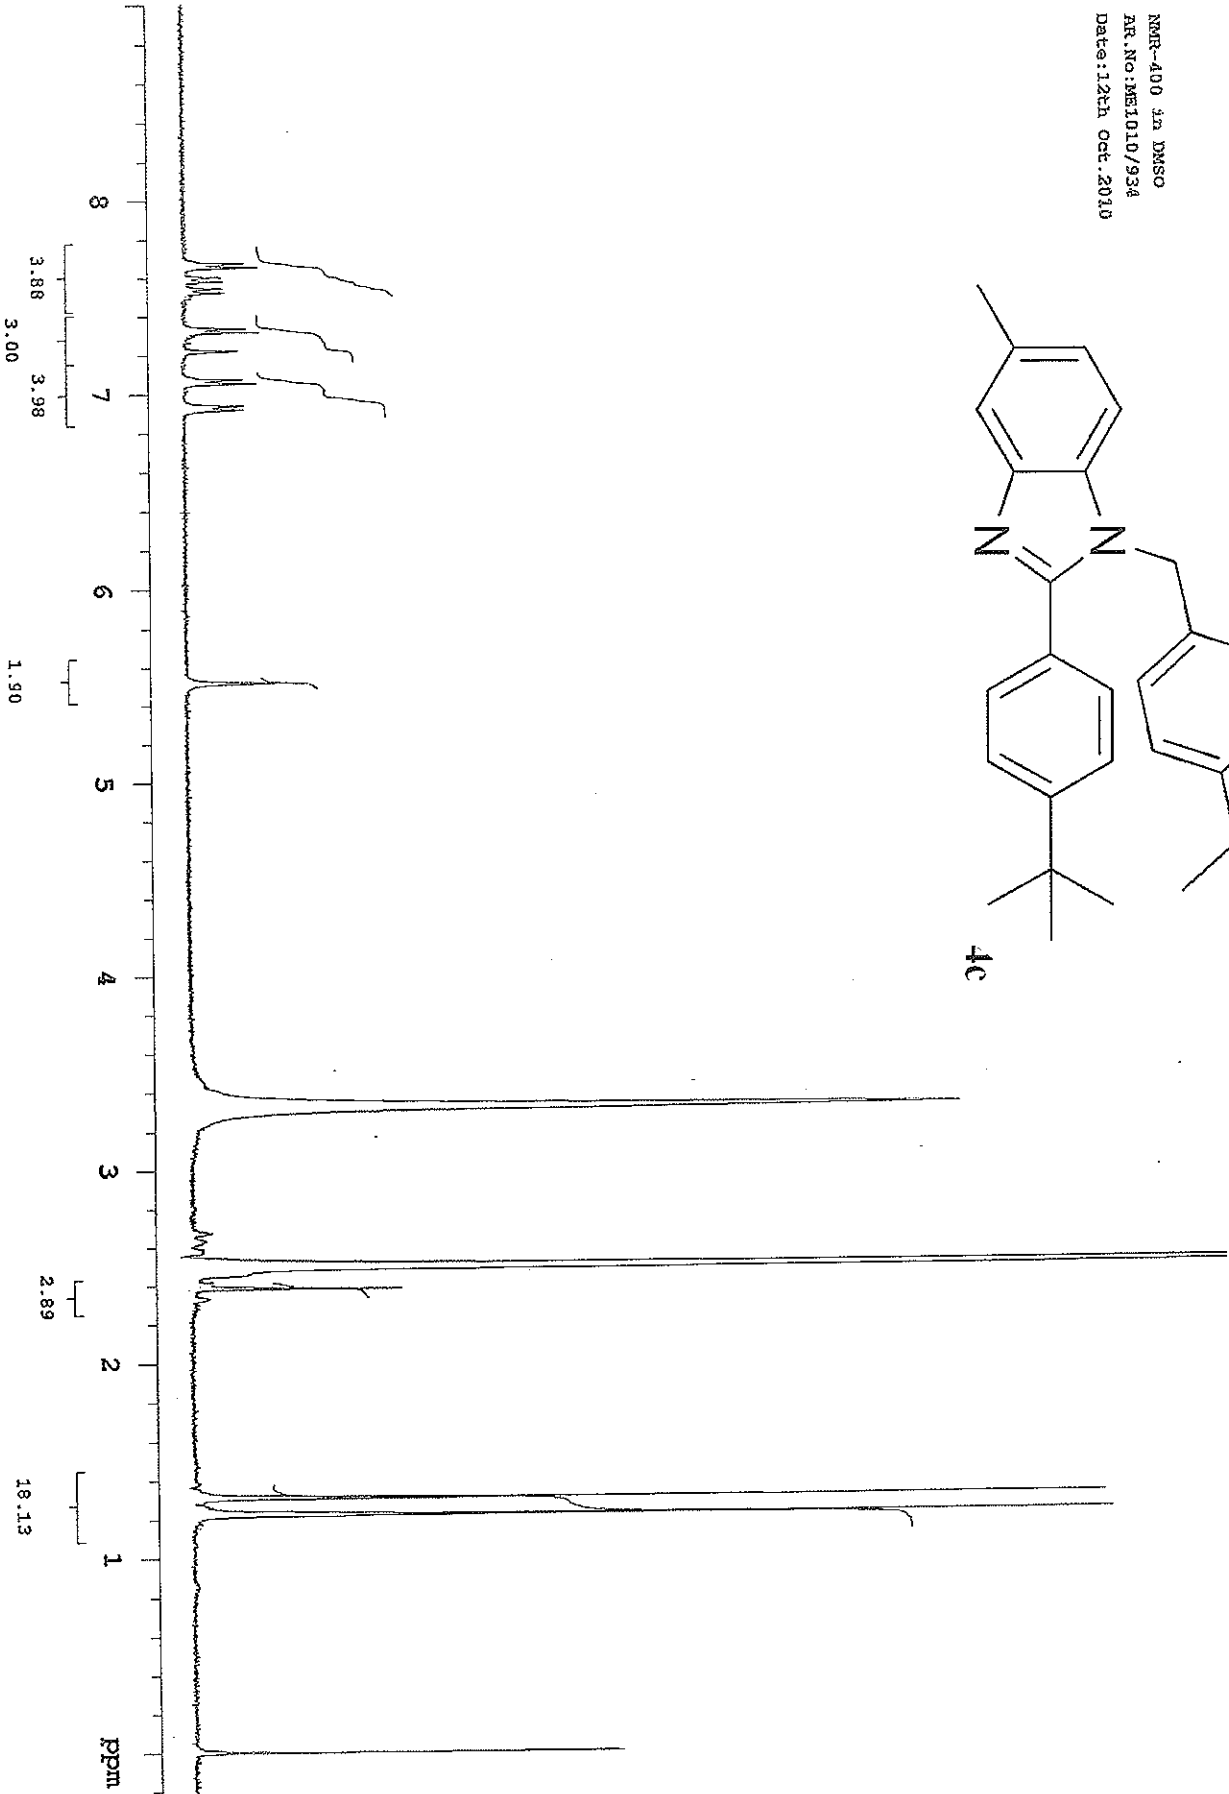

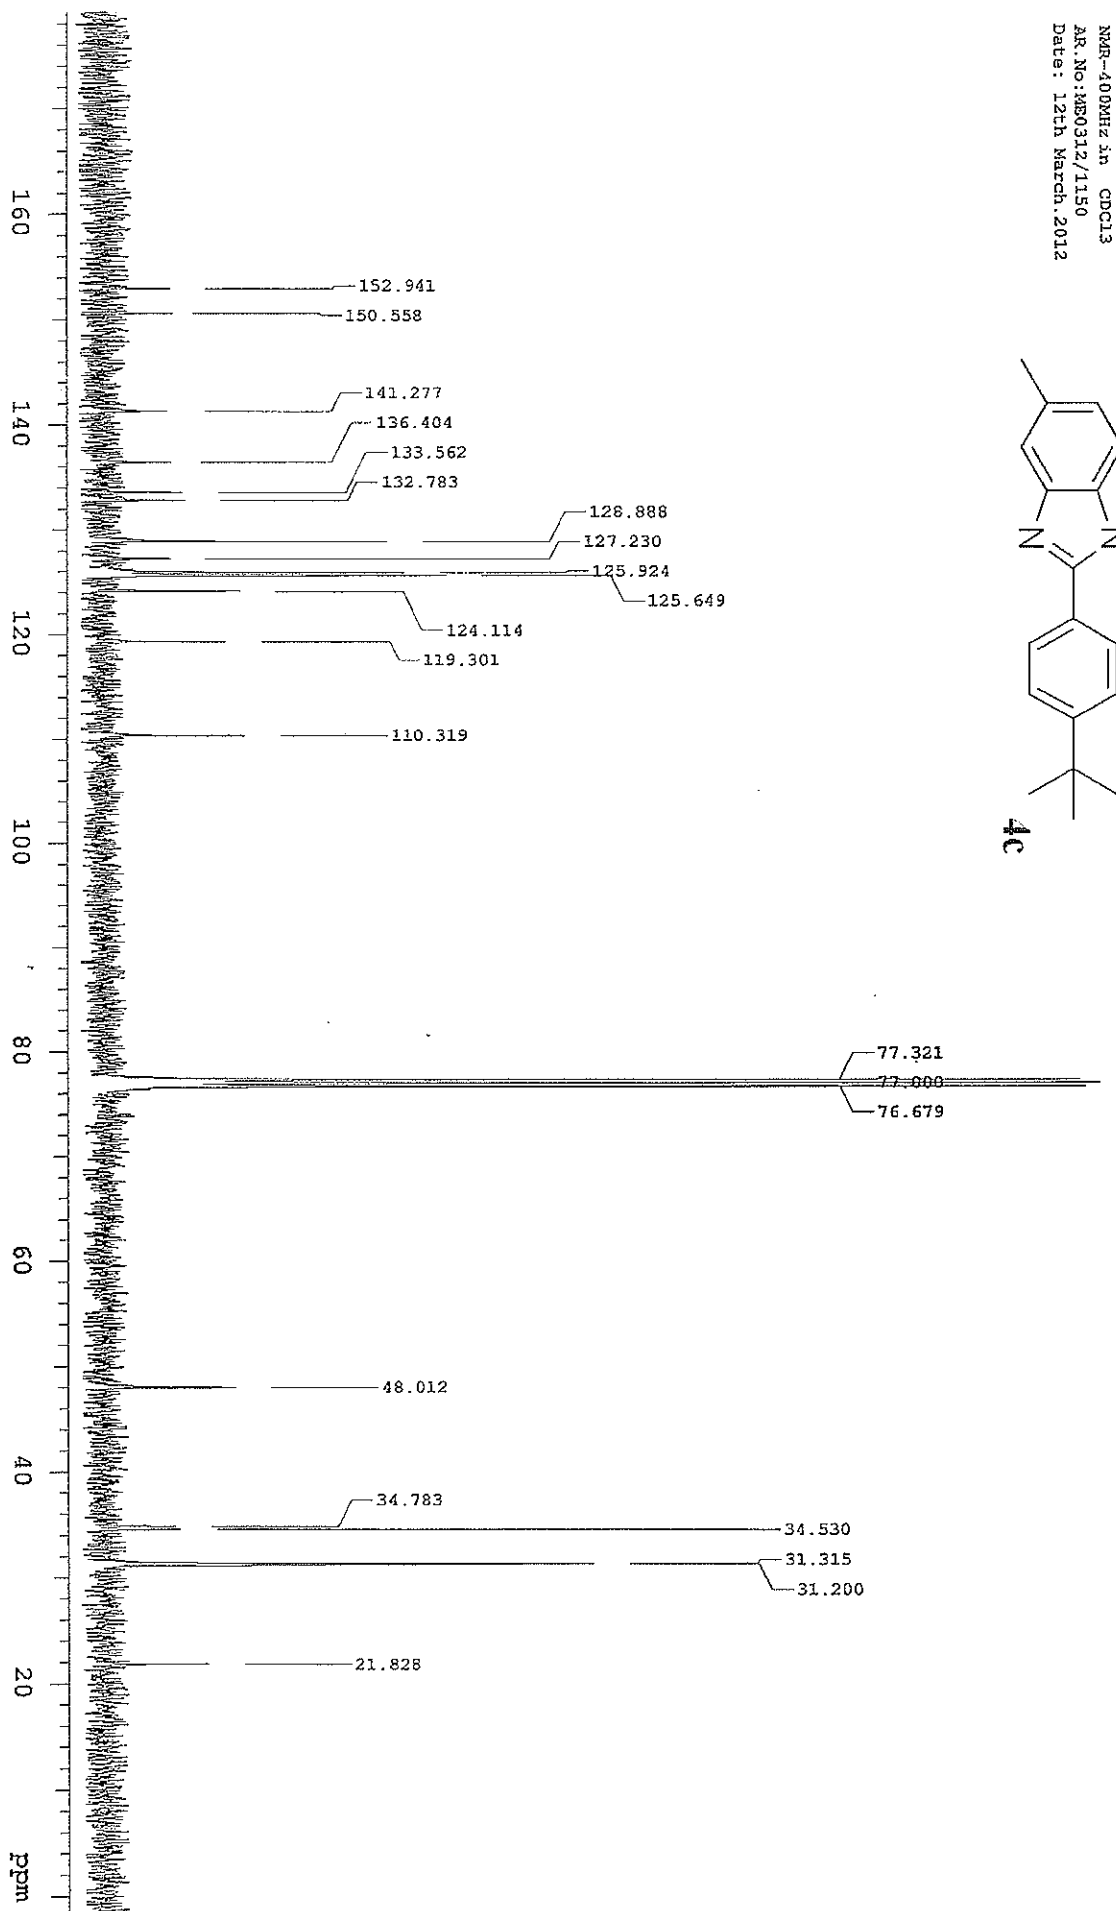

### Single Mass Analysis

Element prediction: Off

### Monoisotopic Mass, Even Electron Ions

3 formula(e) evaluated with 1 results within limits (up to 4 best isotopic matches for each mass)

Elements Used:

C: 0-30    H: 0-40    N: 0-2

UT0312.09 8(0.144) Cm (8:16)

Dr.Reddy's Laboratories Ltd, ARD,TDC-1

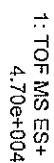

1-11-11

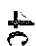

Copies of spectra

NMR-400 1H DMSO  
Ac.No:ME1010/889  
Date: 11 th Oct 2010

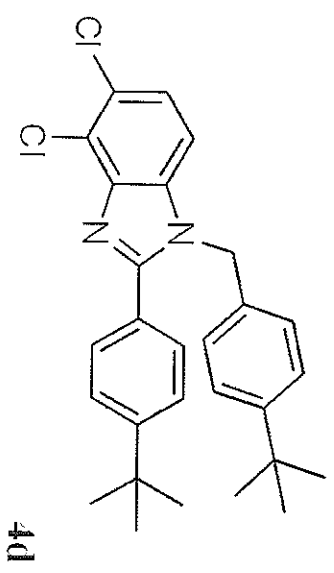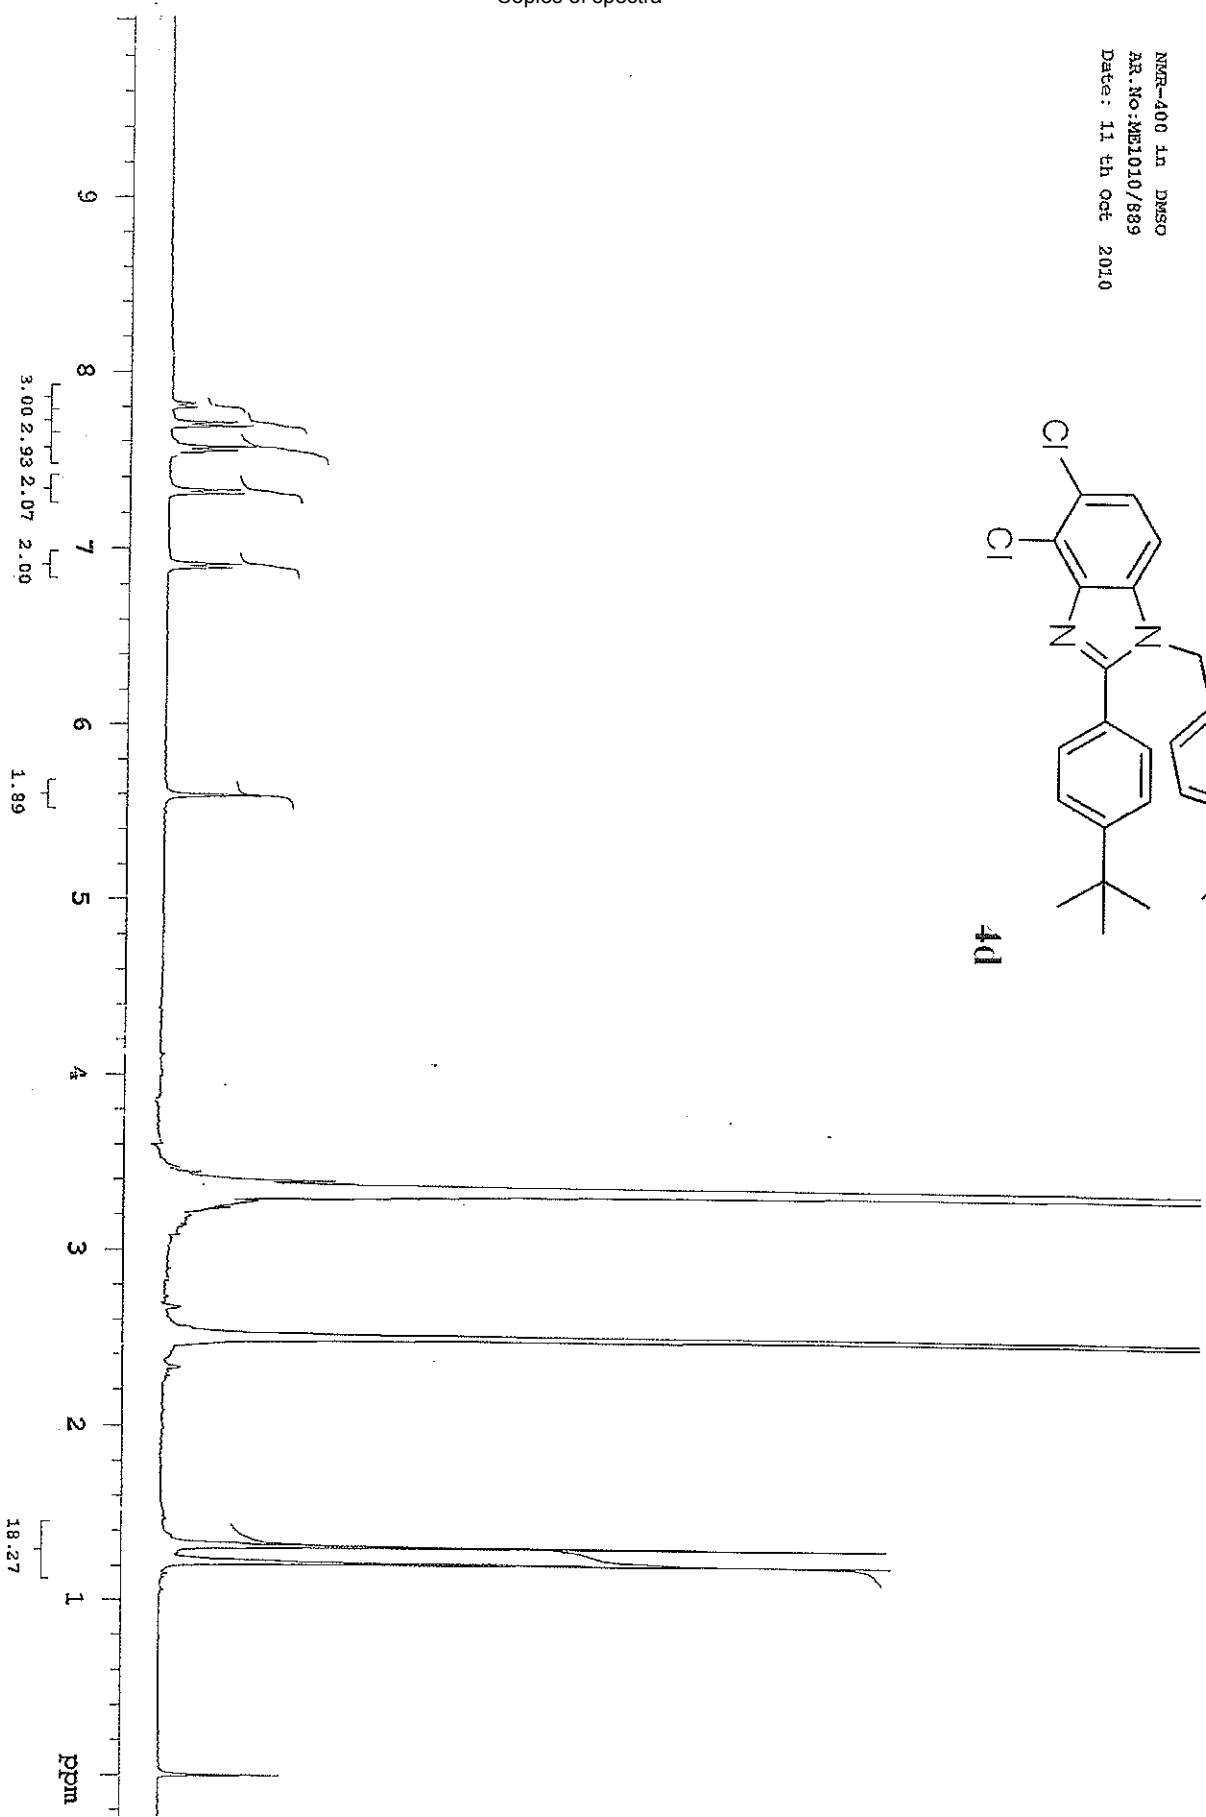

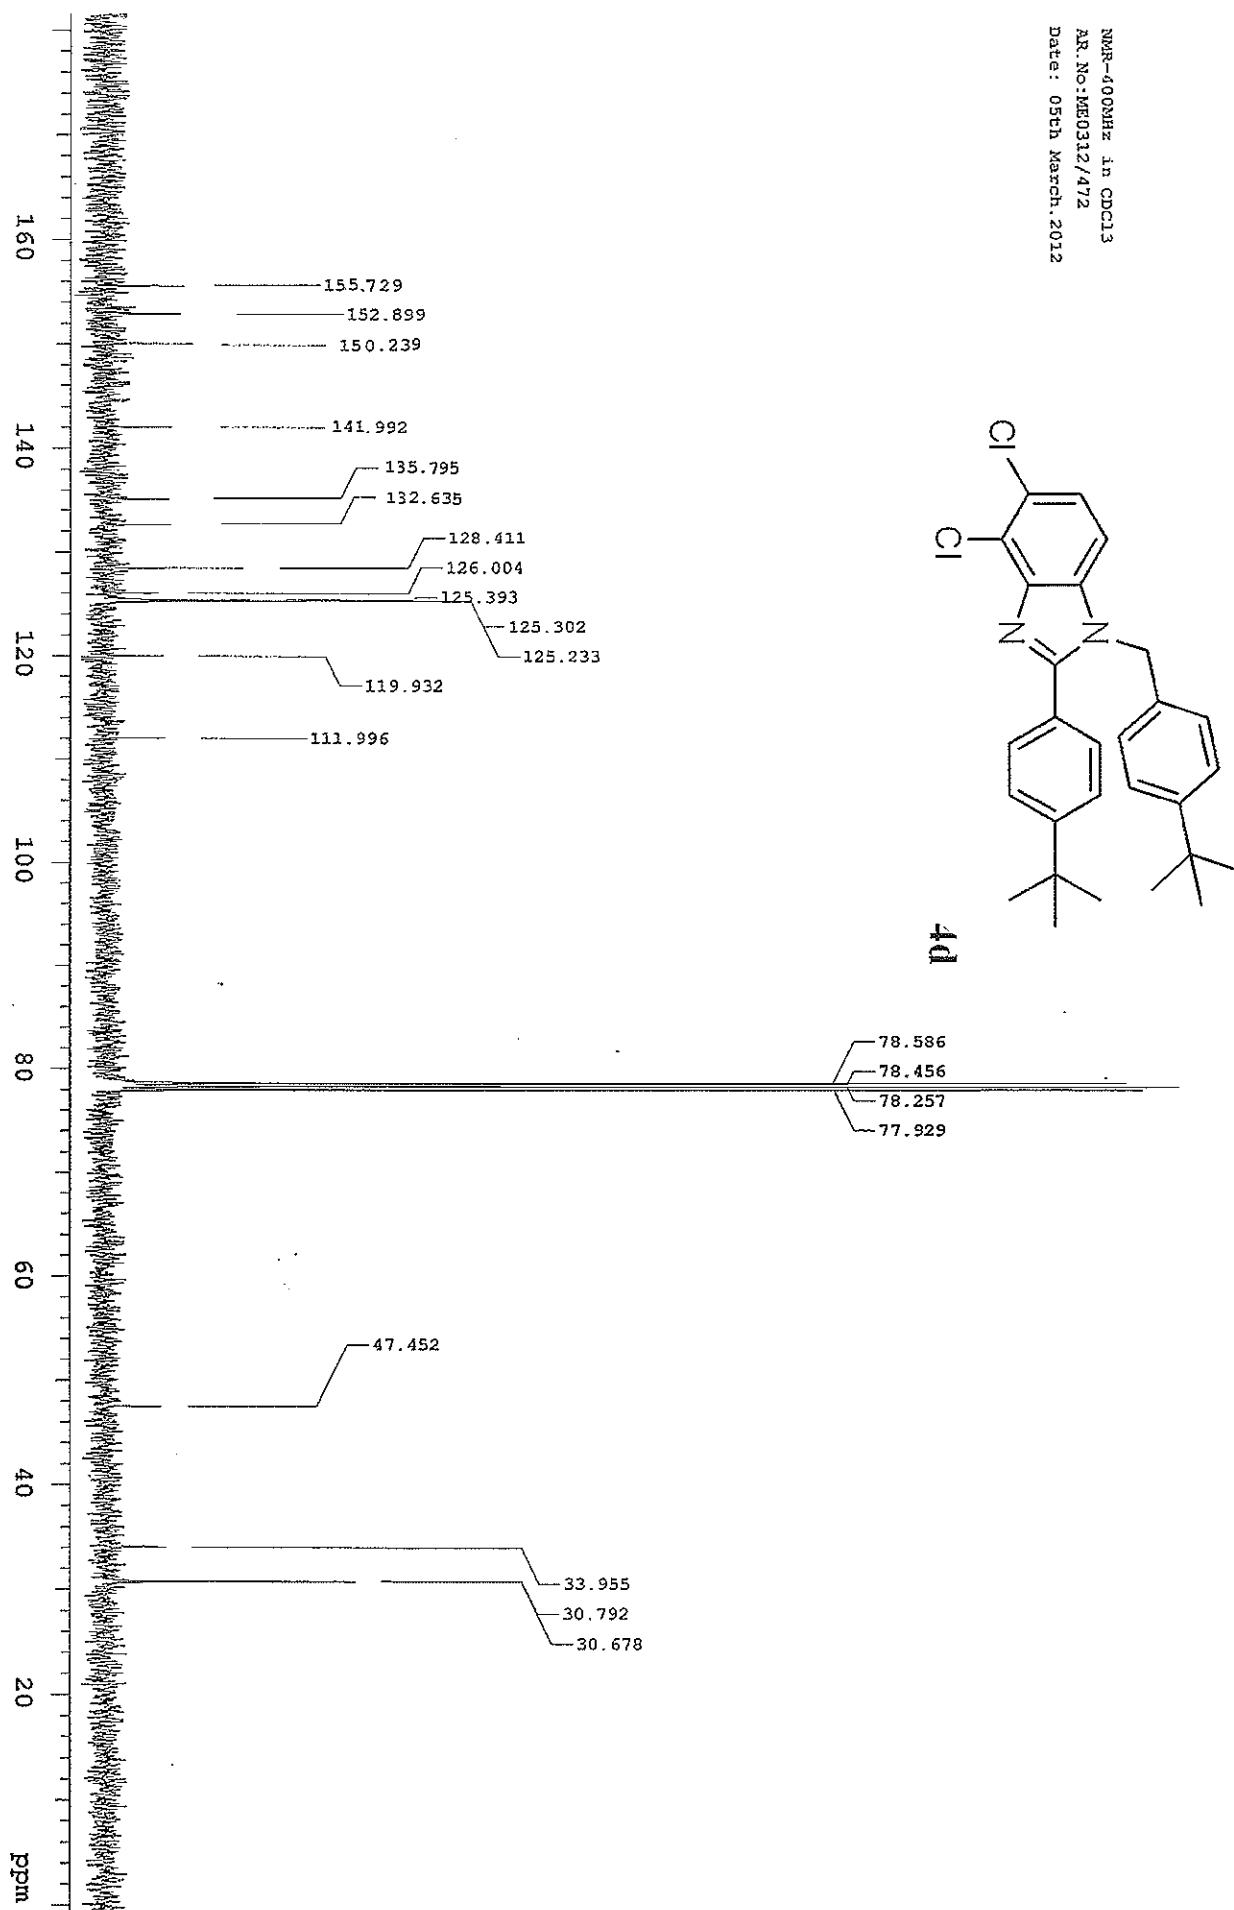

NMR-400MHz in DMSO  
AR.No:ME0312/1717  
Date: 16th March, 2012

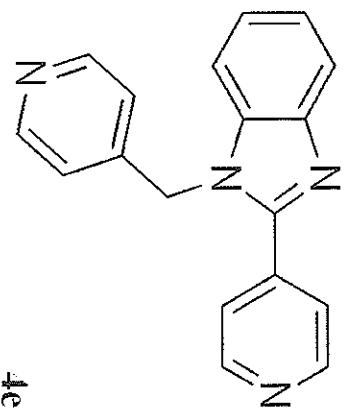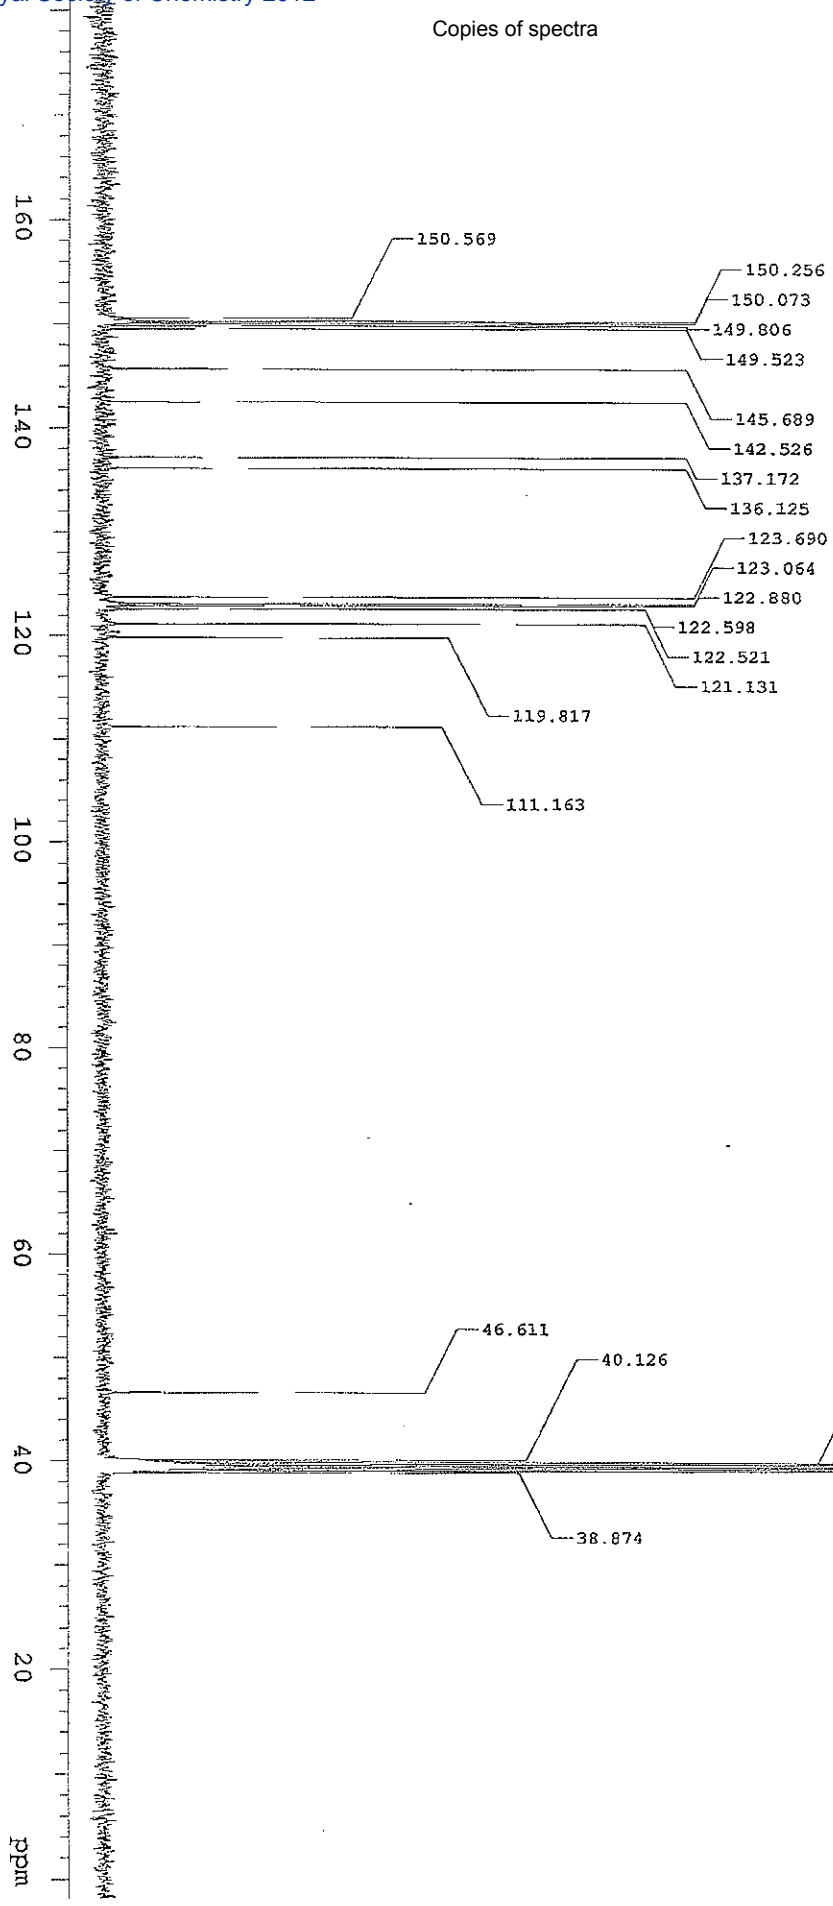

Elemental Composition Report

Single Mass Analysis

Tolerance = 5.0 PPM / DBE: min = -1.0, max = 80.0  
Element prediction: Off  
Number of isotope peaks used for i-FIT = 3

Monoisotopic Mass, Even Electron Ions  
9 formula(e) evaluated with 1 results within limits (up to 4 best isotopic matches for each mass)  
Elements Used:  
C: 0-30 H: 0-35 N: 0-2 Cl: 0-2

Dr. Reddy's Laboratories Ltd, ARD, TDC-1

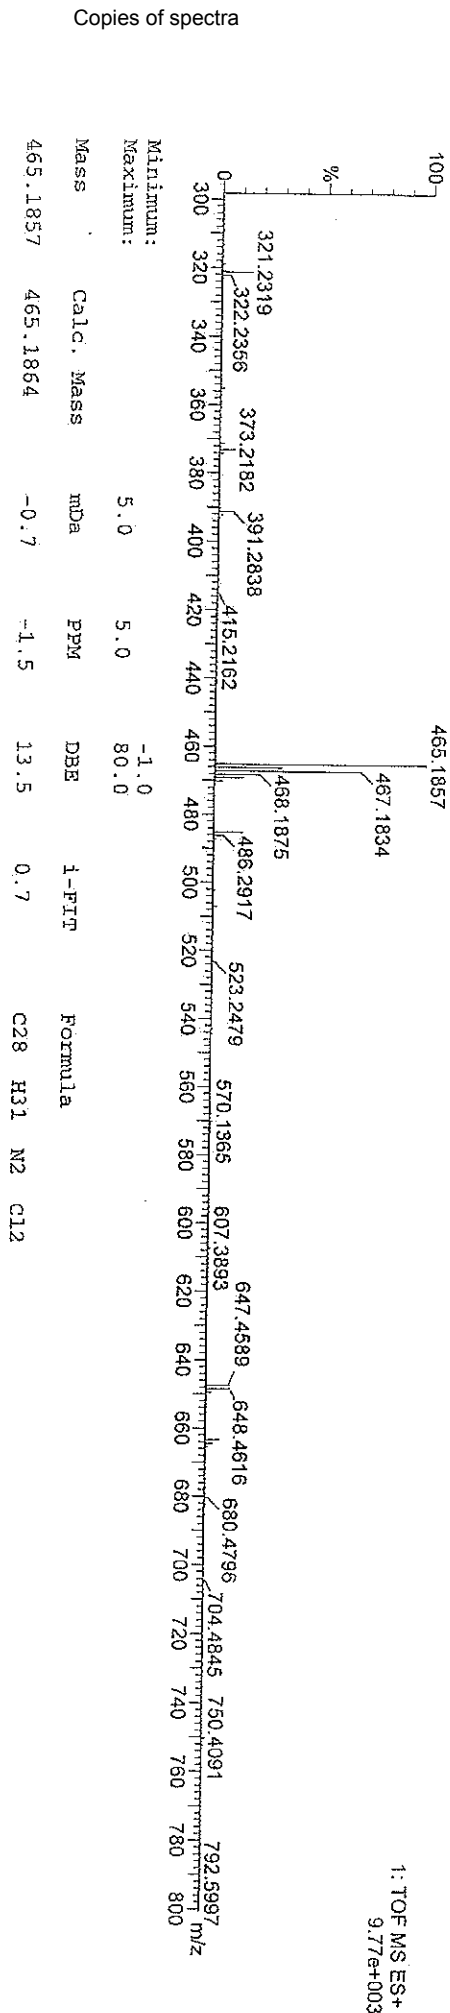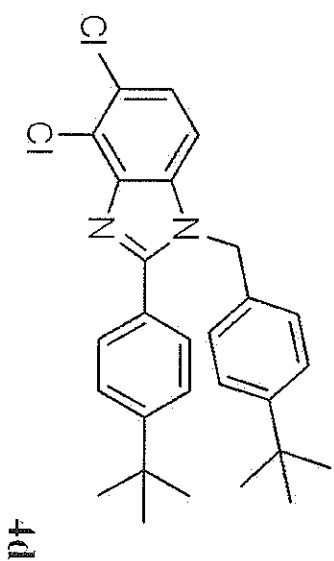

HNMR-400 in DMSO-d6  
AK.NC:NE0311/3014  
Date: 27th May, 2011

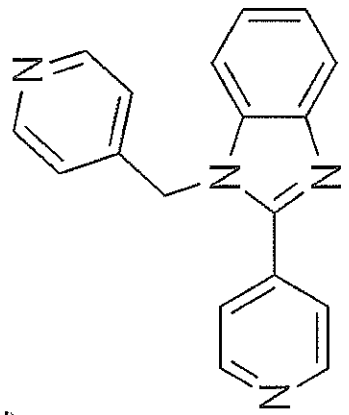

4c

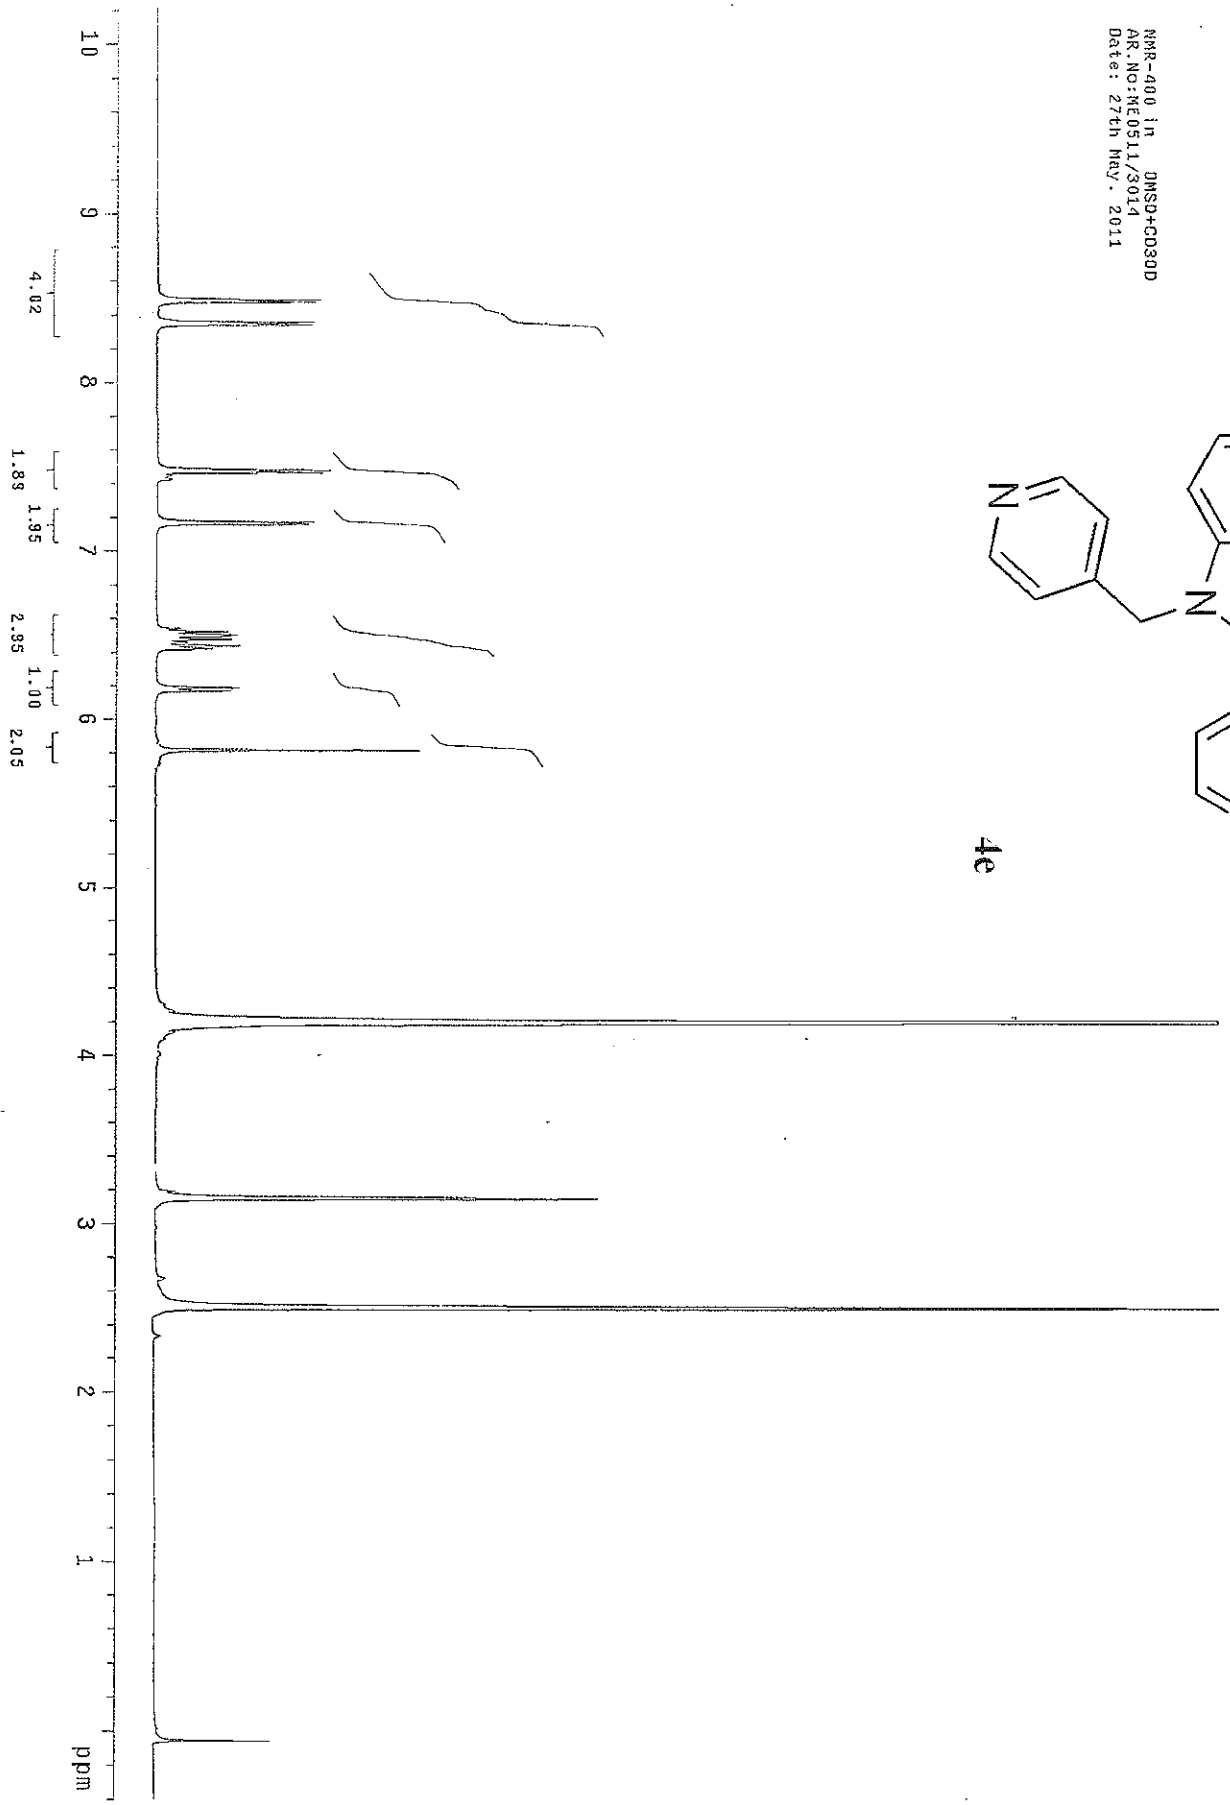



4c  
NMR-400MHz in DMSO  
AR.No:ME0312/1717  
Date: 16th March, 2012

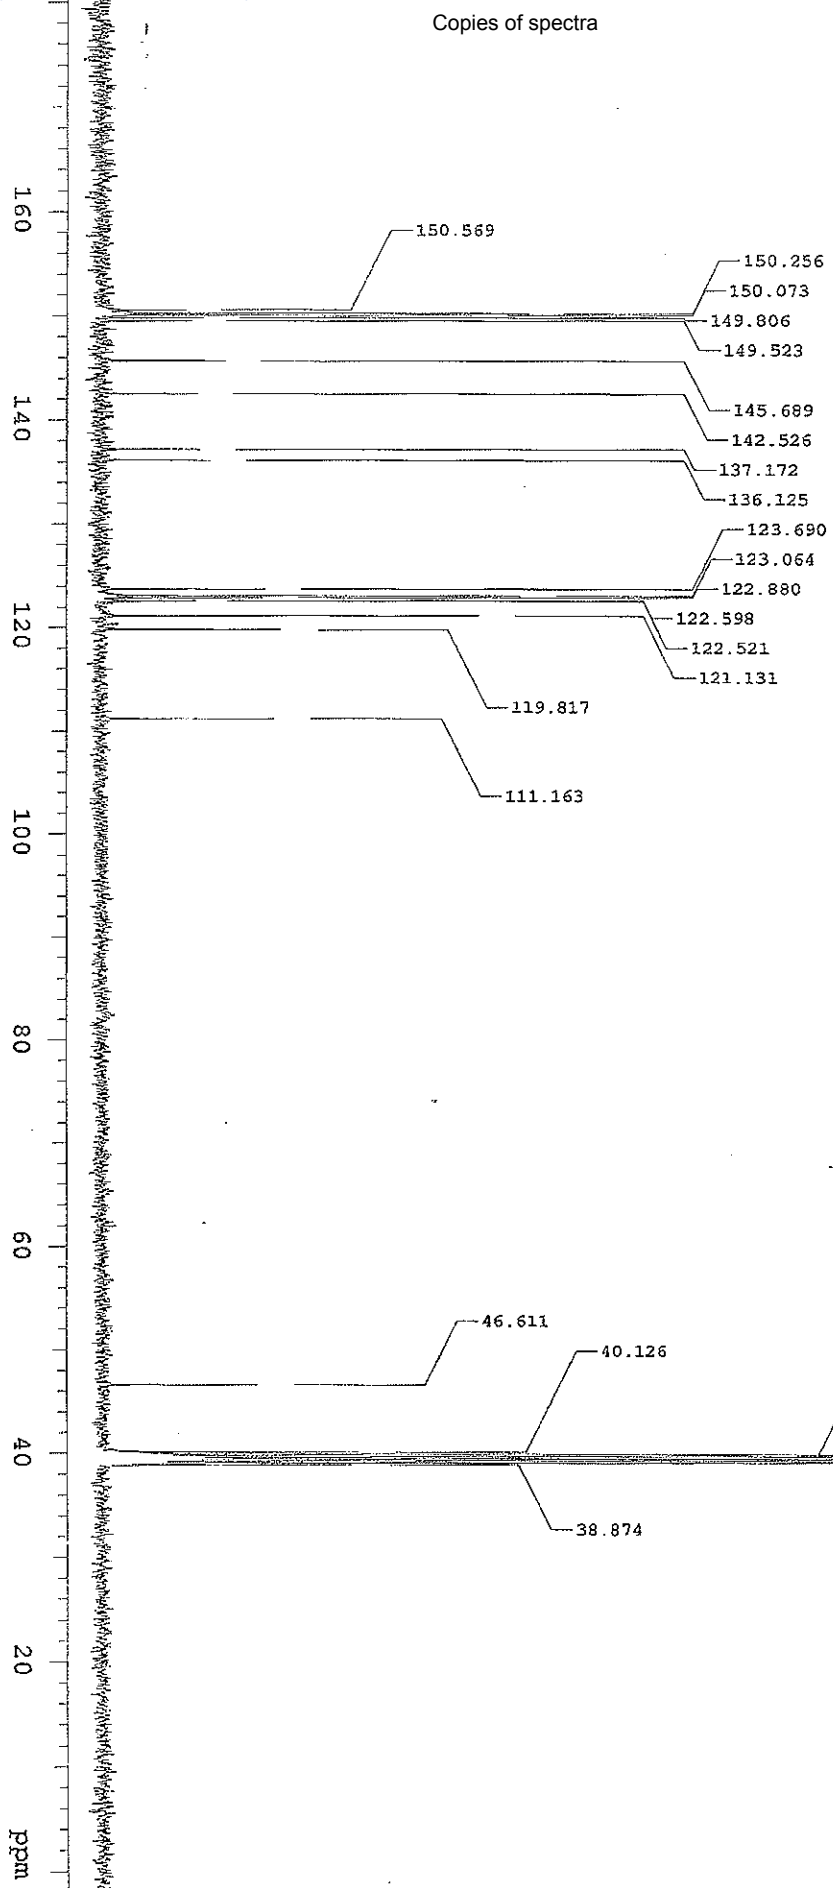

# Elemental Composition Report

## Single Mass Analysis

Tolerance = 5.0 PPM / DBE: min = -1.0, max = 80.0  
Element prediction: Off  
Number of isotope peaks used for i-FIT = 3

Monoisotopic Mass, Even Electron Ions  
5 formula(e) evaluated with 1 results within limits (up to 4 best isotopic matches for each mass)  
Elements Used:  
C: 0-20 H: 0-20 N: 0-4

Dr.Reddy's Laboratories Ltd, ARD, TDC-1

UT0312\_27 22 (0.414) Cm (22.30)

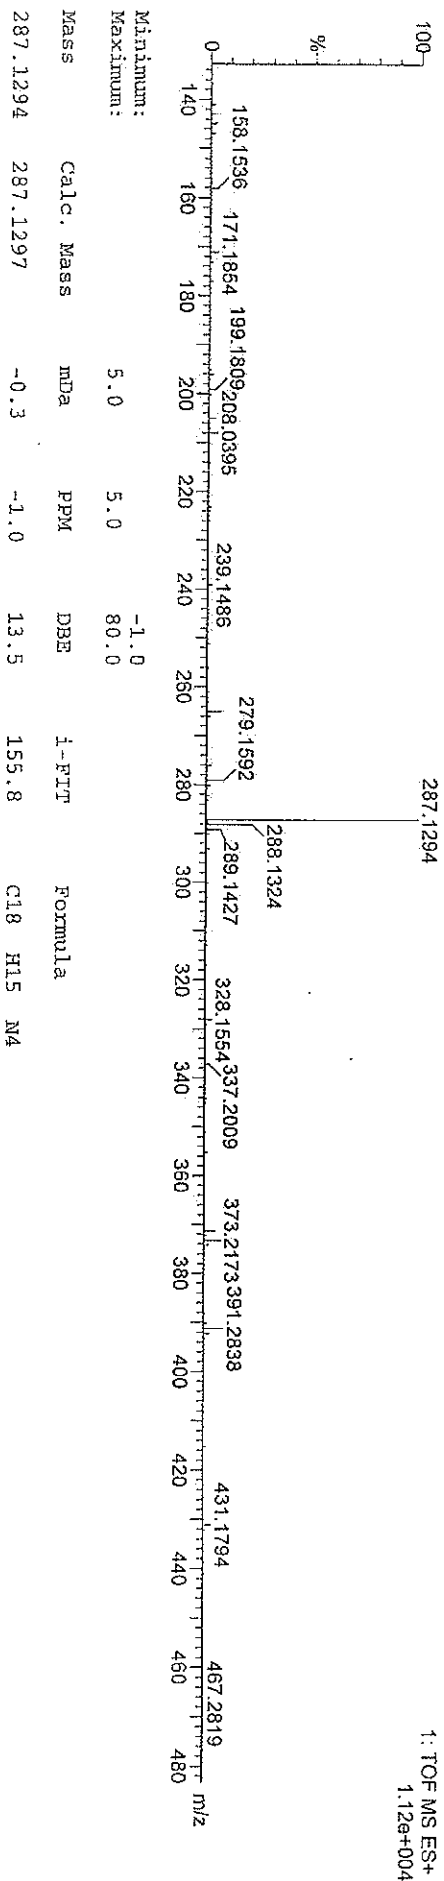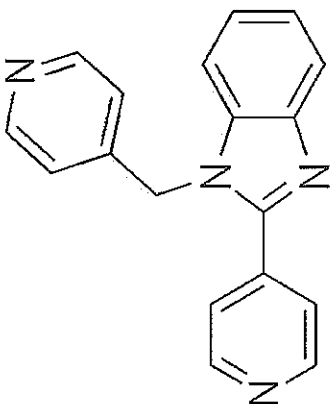

4c

NMR-400 in DMSO  
AR.No:HE0511/2992  
Date: 27th May, 2011

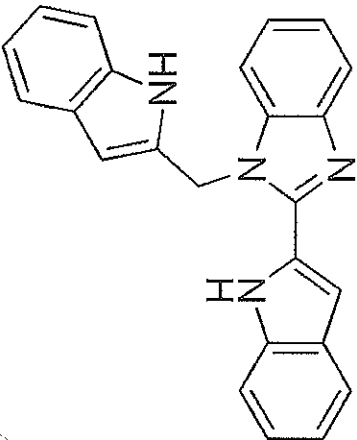

4f

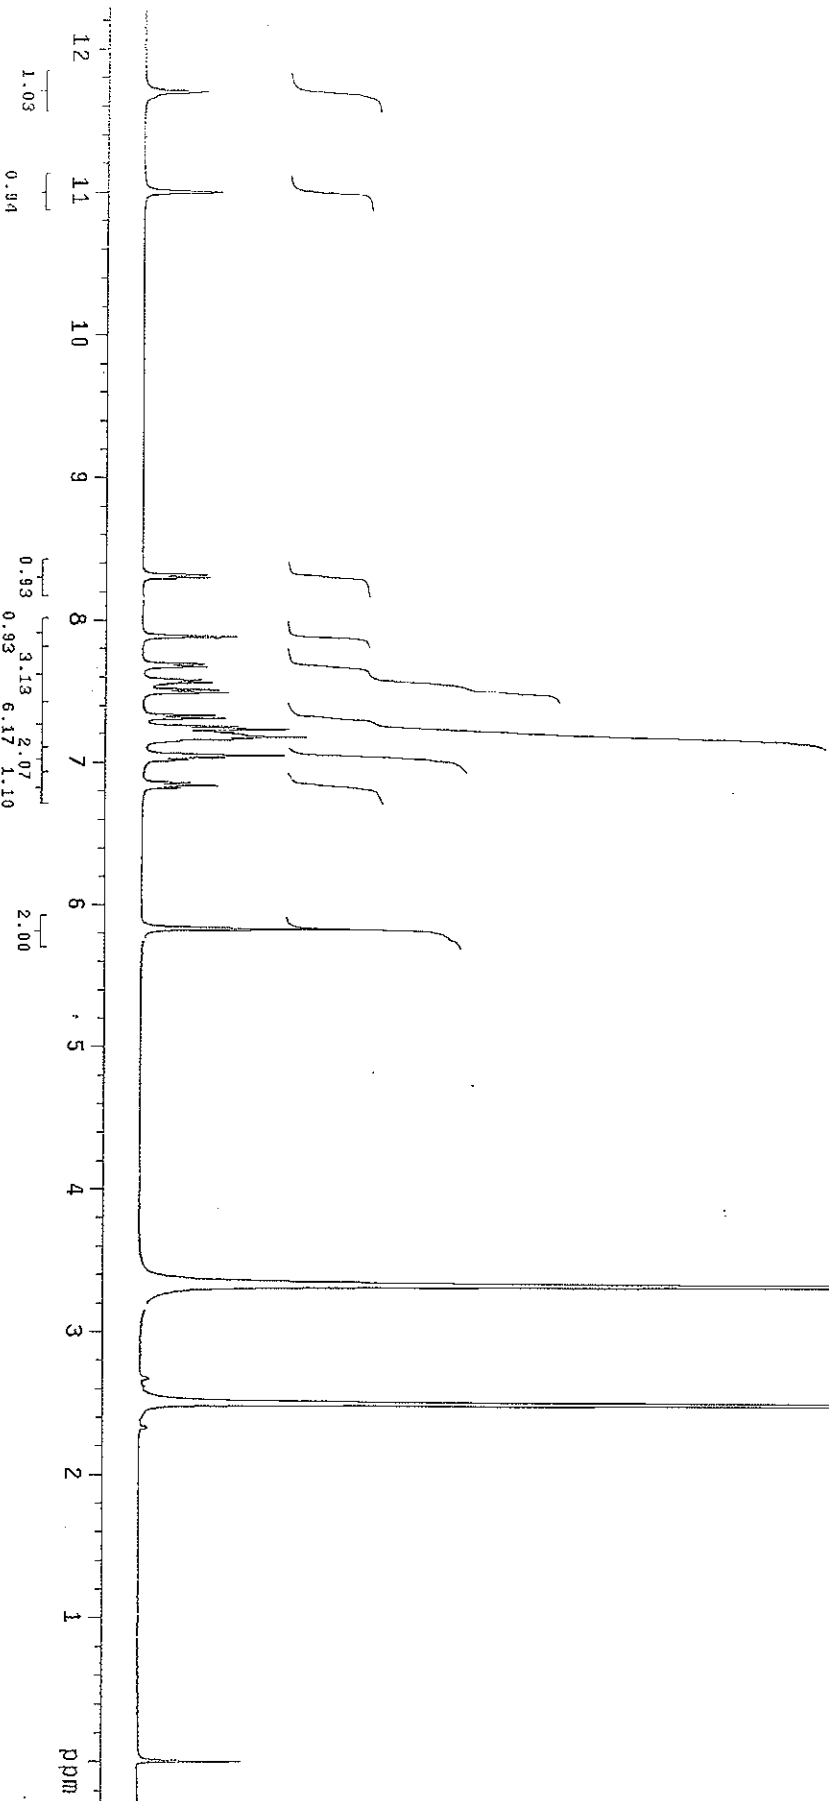

NMR-400MHz in DMSO  
AR.No:ME0312/1716  
Date: 16th March, 2012

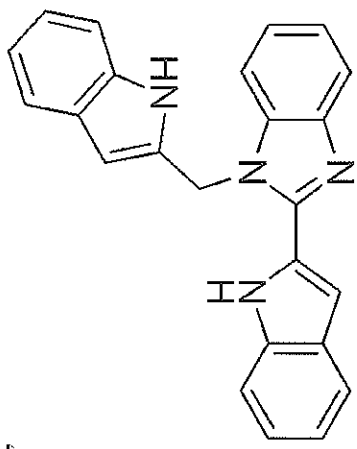

4

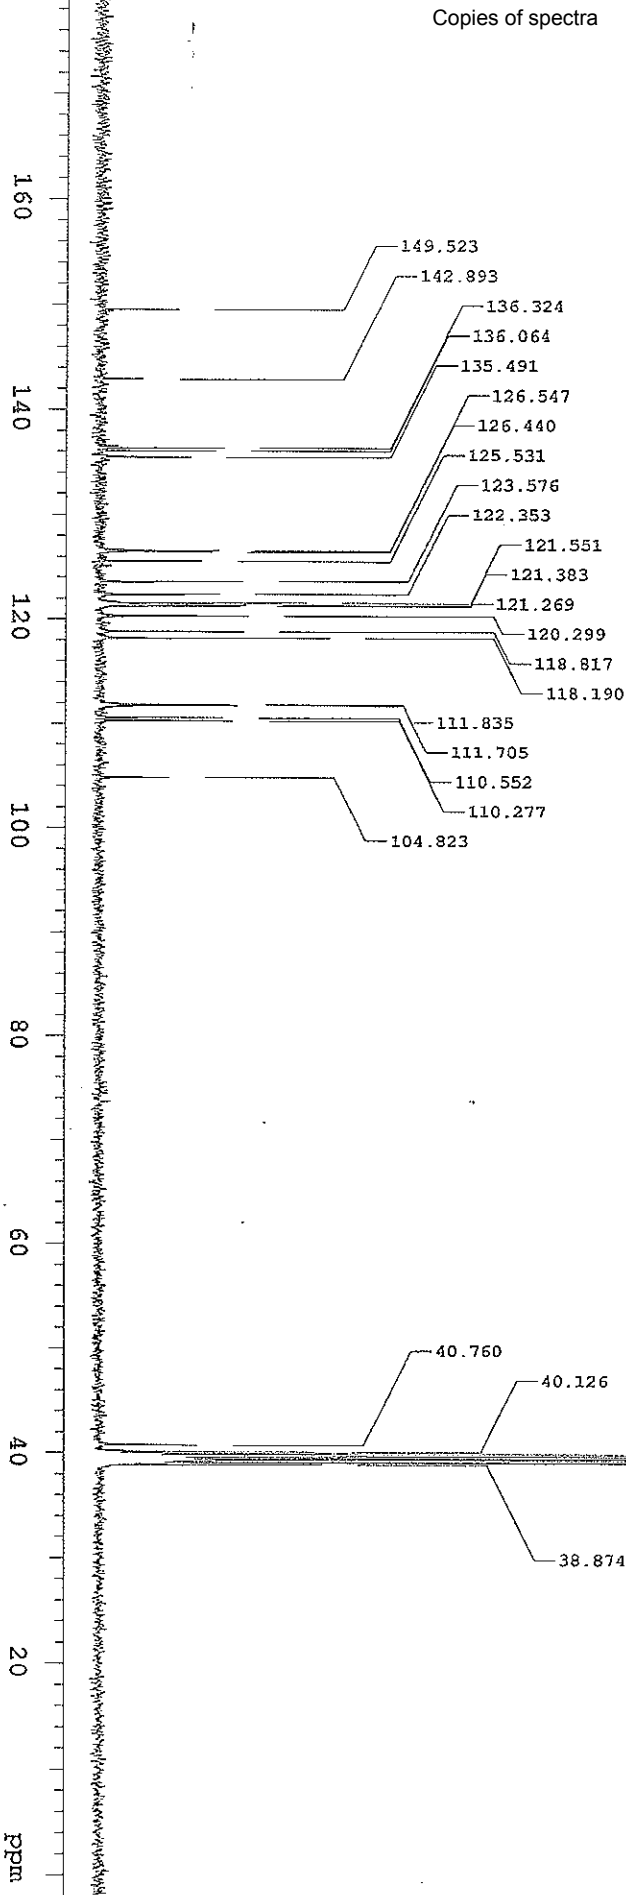

Elemental Composition Report

Single Mass Analysis

Tolerance = 50.0 PPM / DBE: min = -1.0, max = 80.0  
Element prediction: Off  
Number of isotope peaks used for i-FIT = 3

Monoisotopic Mass, Even Electron Ions  
3 formula(e) evaluated with 1 results within limits (up to 4 best isotopic matches for each mass)  
Elements Used:  
C: 0-25 H: 0-20 N: 0-4

Dr.Reddy's Laboratories Ltd, ARD, TDC-1

UT0312\_28 22 (0.413) Cm (22.26)

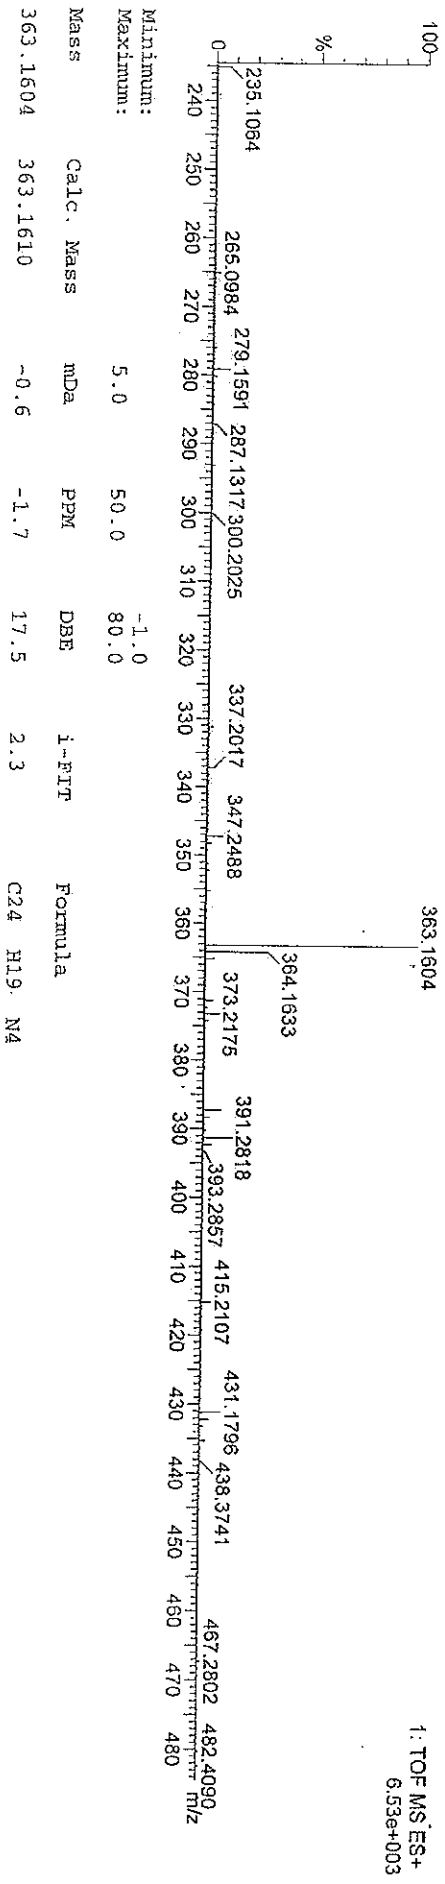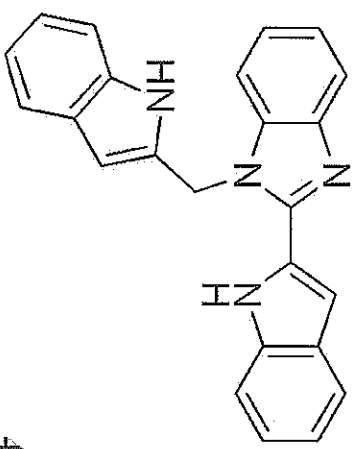

4f
